# Supplementary material for: Comprehensive Analysis of the SBP Family in Blueberry and Their Regulatory Mechanism Controlling Chlorophyll Accumulation
Source: Frontiers journal article supplement (doi:10.3389/fpls.2021.703994), 2021-07-01
Supplement: Image_1.pdf [file Image_1.pdf]

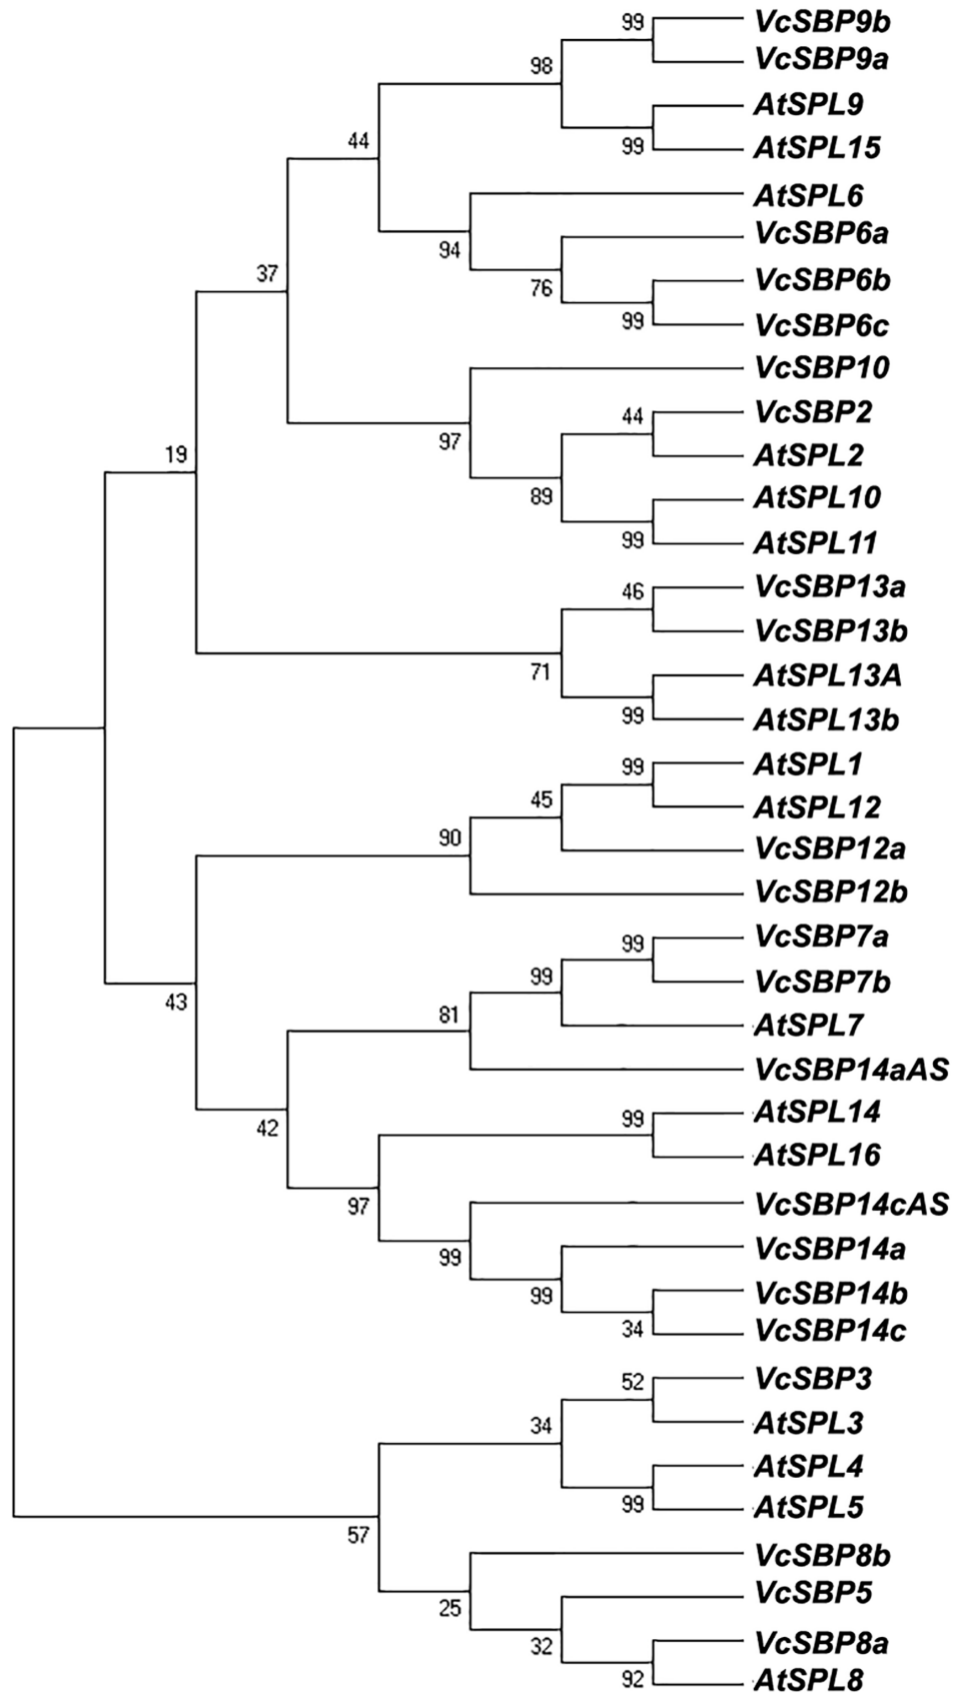

**Supplementary Figure 1** Phylogenetic analysis of *SBP* genes in blueberry and Arabidopsis. The CDS sequences of *AtSBPs* were downloaded from the TAIR website ([www.arabidopsis.org](http://www.arabidopsis.org)). A neighbor-joining tree was generated with the MEGA7 software using the CDS sequences of the *SBP* genes in blueberry and Arabidopsis.
