# Supplementary material for: Comprehensive Analysis of the SBP Family in Blueberry and Their Regulatory Mechanism Controlling Chlorophyll Accumulation
Source: Frontiers journal article supplement (doi:10.3389/fpls.2021.703994), 2021-07-01
Supplement: Image_3.pdf [file Image_3.pdf]

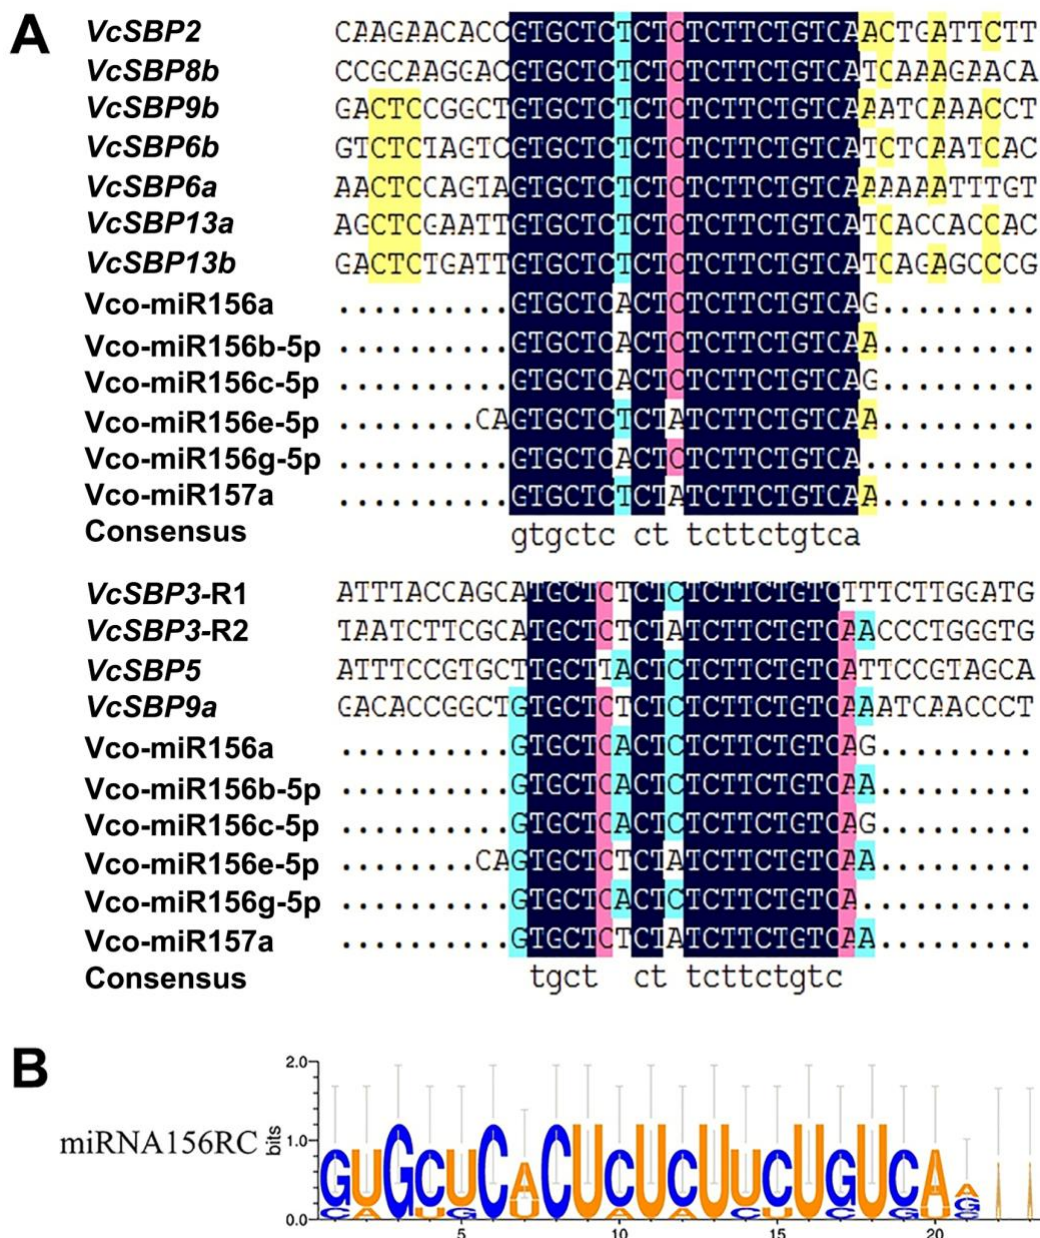

**Supplementary Figure 3** Alignment of miR156 complementary sequences within *VcSBP* genes. **(A)** Complementary sequences are within coding regions and the 3' UTR. Reverse complement sequences of the mature vco-miR156a, vco-miR156b-5p, vco-miR156c-5p, vco-miR156e-5p, vco-miR156g-5p, and vco-miR157a genes are shown below the alignment for comparison. **(B)** The sequence logo of miR156 responsive elements in *VcSBP* genes. The total height of each stack represents the conservation degree of each position, while the height of the letters within each stack indicates the relative frequency of the corresponding nucleotide.
