# Supplementary material for: Comprehensive Analysis of the SBP Family in Blueberry and Their Regulatory Mechanism Controlling Chlorophyll Accumulation
Source: Frontiers journal article supplement (doi:10.3389/fpls.2021.703994), 2021-07-01
Supplement: Image_4.pdf [file Image_4.pdf]

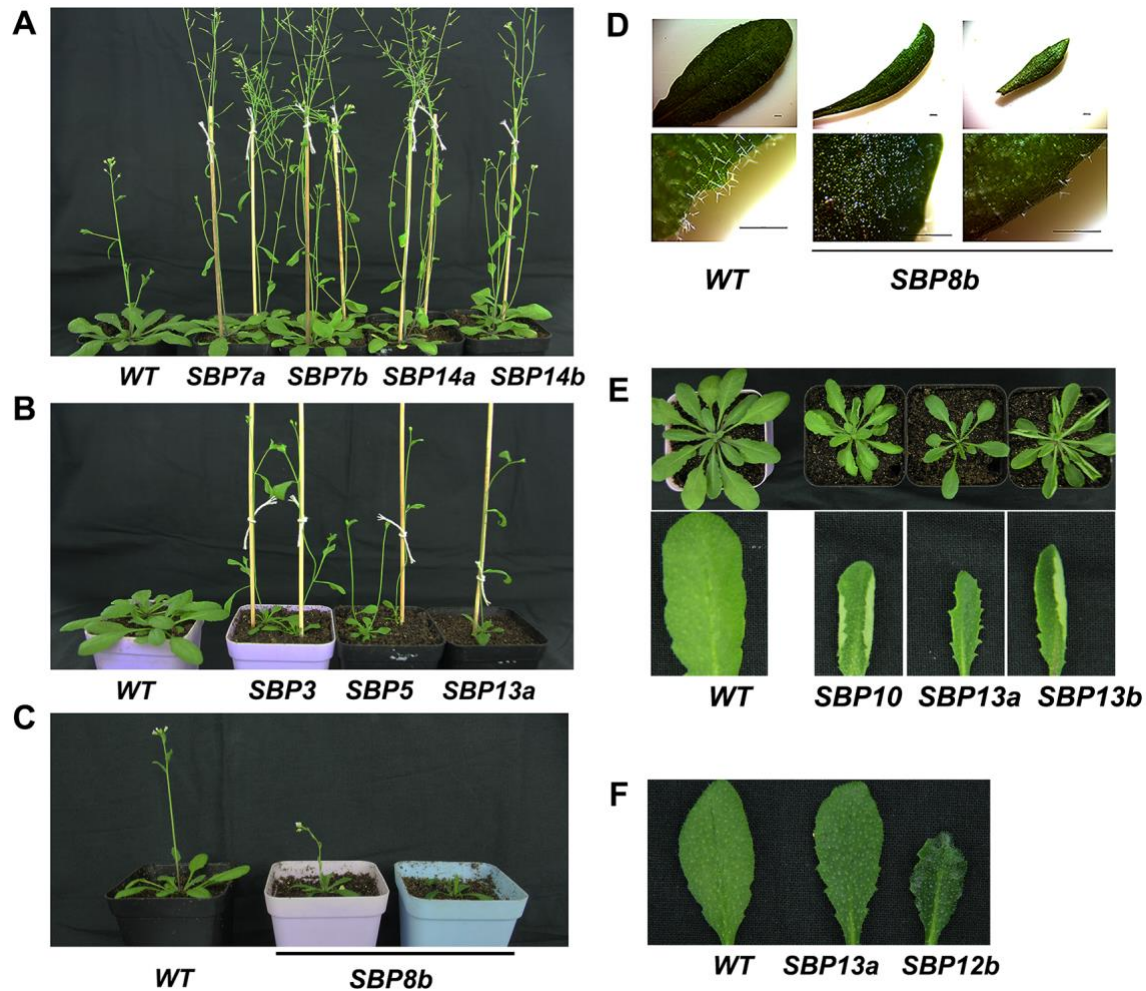

**Supplementary Figure 4** Phenotype of the transgenic Arabidopsis individually overexpressing the *VcSBP* family genes. Early (**A-B**) - and - late (**C**) flowering phenotypes of the transgenic Arabidopsis overexpressing the gene *VcSBP7a*, *VcSBP7b*, *VcSBP14a*, *VcSBP14b*, *VcSBP3*, *VcSBP5*, *VcSBP13a* or *VcSBP8b*. (**D**) Less trichome phenotype of the transgenic Arabidopsis overexpressing the gene *VcSBP7a*. (**E**) Curled leaf phenotype of the transgenic Arabidopsis overexpressing the gene *VcSBP10*, *VcSBP13a* or *VcSBP13b*. (**F**) Serrated leaf phenotype of the transgenic Arabidopsis overexpressing the gene *VcSBP13a* or *VcSBP12b*.
