# Supplementary material for: Comprehensive Analysis of the SBP Family in Blueberry and Their Regulatory Mechanism Controlling Chlorophyll Accumulation
Source: Front Plant Sci. 2021 Jul 1;12:703994. doi: 10.3389/fpls.2021.703994 (PMC8281205; doi:10.3389/fpls.2021.703994)
Supplement: Supplementary Table 1 — Primers used in the study. [file Table_1.XLSX]

## Sheet: Sheet1
Table S1 Primers used in the study
Primer ID	Sequence	Note
VcSBP5-F	GGGGACAAGTTTGTACAAAAAAGCAGGCTTCATGGACGGGTCTGAACCAACC	Cloning gene into the Gateway destination Vector pearleyGate 101
VcSBP5-R	GGGGACCACTTTGTACAAGAAAGCTGGGTCACGGACATGGAACGGTTTGTAGG	Cloning gene into the Gateway destination Vector pearleyGate 101
VcSBP6c-F	GGGGACAAGTTTGTACAAAAAAGCAGGCTTCATGGAGTCTTGGAGTTATGTTTCCC	Cloning gene into the Gateway destination Vector pearleyGate 101
VcSBP6c-R	GGGGACCACTTTGTACAAGAAAGCTGGGTCAATGGACTGAGTCAGATCAATTTTT	Cloning gene into the Gateway destination Vector pearleyGate 101
VcSBP8b-F	GGGGACAAGTTTGTACAAAAAAGCAGGCTTCATGGAACATGGTTGGAGCCTATTC	Cloning gene into the Gateway destination Vector pearleyGate 101
VcSBP8b-R	GGGGACCACTTTGTACAAGAAAGCTGGGTCAACGACATGAGCTCCGCCC	Cloning gene into the Gateway destination Vector pearleyGate 101
VcSBP10-F	GGGGACAAGTTTGTACAAAAAAGCAGGCTTCATGGACTGTGCCTCAAAAACTCC	Cloning gene into the Gateway destination Vector pearleyGate 101
VcSBP10-R	GGGGACCACTTTGTACAAGAAAGCTGGGTCTGGTACACTTATTGCAAAAGGCTTC	Cloning gene into the Gateway destination Vector pearleyGate 101
VcSBP12a-F	GGGGACAAGTTTGTACAAAAAAGCAGGCTTCATGGAGATGAGAGTTGGAGGAGGTG	Cloning gene into the Gateway destination Vector pearleyGate 101
VcSBP12a-R	GGGGACCACTTTGTACAAGAAAGCTGGGTCACAAGATCCAAAGTCCATCGATTCC	Cloning gene into the Gateway destination Vector pearleyGate 101
VcSBP12b-F	GGGGACAAGTTTGTACAAAAAAGCAGGCTTCATGGAGGCTACACTTGGAGGAAAG	Cloning gene into the Gateway destination Vector pearleyGate 101
VcSBP12b-R	GGGGACCACTTTGTACAAGAAAGCTGGGTCTCCGCCCCCTCCATTCTC	Cloning gene into the Gateway destination Vector pearleyGate 101
VcSBP13a-F	GGGGACAAGTTTGTACAAAAAAGCAGGCTTCATGGATTGGAATTTGAAGGCAC	Cloning gene into the Gateway destination Vector pearleyGate 101
VcSBP13a-R	GGGGACCACTTTGTACAAGAAAGCTGGGTCTTCCCAGCAGAAGGGTAGTGTT	Cloning gene into the Gateway destination Vector pearleyGate 101
VcSBP13b-F	GGGGACAAGTTTGTACAAAAAAGCAGGCTTCATGCTTGGGAGGATTAGTAGATCT	Cloning gene into the Gateway destination Vector pearleyGate 101
VcSBP13b-R	GGGGACCACTTTGTACAAGAAAGCTGGGTCTTCCCATCTGAATGACAGGGTT	Cloning gene into the Gateway destination Vector pearleyGate 101
VcSBP14aAS-F	GGGGACAAGTTTGTACAAAAAAGCAGGCTTCATGAAGTGCATAACTCTTCCATTCT	Cloning gene into the Gateway destination Vector pearleyGate 101
VcSBP14aAS-R	GGGGACCACTTTGTACAAGAAAGCTGGGTCTCCAACTCTTTTACCCTGTGCAC	Cloning gene into the Gateway destination Vector pearleyGate 101
VcSBP14bAS-F	GGGGACAAGTTTGTACAAAAAAGCAGGCTTCATGGAAGACATAGGTGCGCAAG	Cloning gene into the Gateway destination Vector pearleyGate 101
VcSBP14bAS-R	GGGGACCACTTTGTACAAGAAAGCTGGGTCTCTAACACATGAAACAACAGAAAAT	Cloning gene into the Gateway destination Vector pearleyGate 101
VcSBP14c-F	GGGGACAAGTTTGTACAAAAAAGCAGGCTTCATGGAAGACATAGGTGCGCAAG	Cloning gene into the Gateway destination Vector pearleyGate 101
VcSBP14c-R	GGGGACCACTTTGTACAAGAAAGCTGGGTCGGTCATATTATCATCAATGAGAAGA	Cloning gene into the Gateway destination Vector pearleyGate 101
VcSBP7a-F	GGACTCTAGAGGATCCATGGACCCTCCTCCTTCGCC	Cloning gene into the destination vector pBI121
VcSBP7a-R	GGGGAAATTCGAGCTCCTATTTGTTGTCAAACAGACACCTG	Cloning gene into the destination vector pBI121
VcSBP7b-F	GGACTCTAGAGGATCCATGGACCCTCCTCCTCCTTCG	Cloning gene into the destination vector pBI121
VcSBP7b-R	GGGGAAATTCGAGCTCCTATTTGTTGTCAAACAGACACCTG	Cloning gene into the destination vector pBI121
VcSBP14a-F	GGACTCTAGAGGATCCATGGAAGACATAGGTGCGCAAG	Cloning gene into the destination vector pBI121
VcSBP14a-R	GGGGAAATTCGAGCTCCTAACTTGTGCCATAACACAGACTC	Cloning gene into the destination vector pBI121
VcSBP14b-F	GGACTCTAGAGGATCCATGGAAGACATAGGTGCGCAAG	Cloning gene into the destination vector pBI121
VcSBP14b-R	GGGGAAATTCGAGCTCCTATAGATATATTATGAACCATAAG	Cloning gene into the destination vector pBI121
VcSBP2q-F	ACAGACTGGGGAATTGAAGATGAAG	qPCR for gene expression
VcSBP2q-R	TAAATGCCTCCTTTGATGAAGAACC	qPCR for gene expression
VcSBP3q-F	GGAAACAAGTAGAGCTGGAGGAAAG	qPCR for gene expression
VcSBP3q-R	TCCCCAGACCCTAACCCTAAAG	qPCR for gene expression
VcSBP5q-F	CCGAGGTCAAGCCTTCAGTTG	qPCR for gene expression
VcSBP5q-R	CATGGAACGGTTTGTAGGTGGG	qPCR for gene expression
VcSBP6aq-F	GGGGAAATGGGCTGATTGG	qPCR for gene expression
VcSBP6aq-R	TCGTTCGTGCTCTCTTTGCTG	qPCR for gene expression
VcSBP6b/6cq-F	AATACCTAGATGCCAGGGAGCG	qPCR for gene expression
VcSBP6b/6cq-R	CTGCATGGATTGCTTTTCACG	qPCR for gene expression
VcSBP7a/7bq-F	CGATAATAAGAGGGCGGTGGATAAG	qPCR for gene expression
VcSBP7a/7bq-R	CAACATCAACAGCAGTCGCACAC	qPCR for gene expression
VcSBP8aq-F	CCAAACTCAGGCCCATCATTACC	qPCR for gene expression
VcSBP8aq-R	GACCCGAACTCAACGACACCAC	qPCR for gene expression
VcSBP8bq-F	CCACCACTACTACTGCTCGCTTTG	qPCR for gene expression
VcSBP8bq-R	GGGGTGGTGGGGGTTTAACAT	qPCR for gene expression
VcSBP9aq-F	ACTGGGCTATATACCCATCCATCAG	qPCR for gene expression
VcSBP9aq-R	TTGAATAACCCCTCTCTTCCCTTTC	qPCR for gene expression
VcSBP9bq-F	ACCAGAAAACCCTCCTGCGTC	qPCR for gene expression
VcSBP9bq-R	ACTTGTGGATCGGGCTTGTTG	qPCR for gene expression
VcSBP10q-F	ATGGACTGTGCCTCAAAAACTCC	qPCR for gene expression
VcSBP10q-R	GAATCCGCCGAAGAATAAGGAAAT	qPCR for gene expression
VcSBP12aq-F	GGTGCAAGGCTCTCATCAGTCAAG	qPCR for gene expression
VcSBP12aq-R	GAATCTGCGCTCGTAGGACATAAGG	qPCR for gene expression
VcSBP12bq-F	GGGATCTGTTTACGGCTGCTCC	qPCR for gene expression
VcSBP12bq-R	CACATCCCTCCTCCGTTTTTCC	qPCR for gene expression
VcSBP13aq-F	ATGGATTGGAATTTGAAGGCACC	qPCR for gene expression
VcSBP13aq-R	TCGCCCTTATTCCCTTGACCTC	qPCR for gene expression
VcSBP13bq-F	TGGAAGCTTCGTCATCATCTGG	qPCR for gene expression
VcSBP13bq-R	AGGTCTGAATTGCACCCATCAAC	qPCR for gene expression
VcSBP14a-14cq-F	GGACAGCGTTAGGTTTGTTGCC	qPCR for the gene expressions of VcSBP14a, VcSBP14b, VcSBP14c
VcSBP14a-14cq-R	TCGTCTTCATCCACAGAGTCGTTG	qPCR for the gene expressions of VcSBP14a, VcSBP14b, VcSBP14c
VcSBP14aASq-F	GTGCATAACTCTTCCATTCTTTCCC	qPCR for gene expression
VcSBP14aASq-R	ACCACAACGCCGCTTAAACC	qPCR for gene expression
AtCHLH-F	TCTTCACACAGACGAACCCG	qPCR for gene expression
AtCHLH-R	TGTTGAGAGATTGCACGGCT	qPCR for gene expression
AtDVR-F	TTTCCTTCGGTTGGAGAGGC	qPCR for gene expression
AtDVR-R	TTCACCGAGTTCTTGACCCG	qPCR for gene expression
AtPORA-F	TGAGATGCAAGAGGGAACAGAG	qPCR for gene expression
AtPORA-R	TGCCTTTGCCGTTGCTAAAC	qPCR for gene expression
AtPORB-F	GTGCCTCCATTACCGACCAA	qPCR for gene expression
AtPORB-R	GCACGCCATTATCACGTTCC	qPCR for gene expression
AtPORC-F	GCTCTCCAAGCTGCCTATTCT	qPCR for gene expression
AtPORC-R	CGCGGTTTCTGTCTTCTCTGT	qPCR for gene expression
AtCAO-F	CTCCAGAAAGAAGGGCGTGA	qPCR for gene expression
AtCAO-R	CGAGCACGCCAATCCAAGTA	qPCR for gene expression
AtHEMA1-F	CGCTGGAAAAATGGGGAAGC	qPCR for gene expression
AtHEMA1-R	TACCAGGCATCTCCTCACGGATAG	qPCR for gene expression
VcLHCB2-F	CCCAATCCCAAACAAGGACCAATC	qPCR for gene expression
VcLHCB2-R	GATATTGAGATGGAGAGGAGGGCAG	qPCR for gene expression
VcLHC-F	GCCTTTCCGACGCTAAACAATCC	qPCR for gene expression
VcLHC-R	CAAACCCGTAATCCCCAACCAAG	qPCR for gene expression
VcLHCB-F	GACCAGGCAGCTCTGTTGAAAGTG	qPCR for gene expression
VcLHCB-R	CAAGCACGGTGAGCAAGTTGTTG	qPCR for gene expression
VcLQY-F	CTAGAGAAGTGCCGATTTTGCCTG	qPCR for gene expression
VcLQY-R	CGAGGTTGAATACCACTGCCTTGAC	qPCR for gene expression
VcPOR1-F	CGAAATTCCCTCGAATGAAGGTTC	qPCR for gene expression
VcPOR1-R	CAAAAGCCGCCTCTATTGACTCTG	qPCR for gene expression
VcLPA3-F	CTCATTCTCTCCCCTCAAACCTCG	qPCR for gene expression
VcLPA3-R	CAAGTGAAATCGCAGCATCGGTG	qPCR for gene expression
pLacZi-pVcLHBC1-F	ATCTGTCGACCTCGAGATACTCCGTACGTCCGGATT	Y1H assay
pLacZi-pVcLHBC1-R	GAGCACATGCCTCGAGTTATTAATTGTACGAAGGGG	Y1H assay
pB42AD-VcSBP13a-F	TGCCTCTCCCGAATTCATGGATTGGAATTTGAAGGC	Y1H assay
pB42AD-VcSBP13a-R	CGAGTCGGCCGAATTCCTATTCCCAGCAGAAGGGTA	Y1H assay
