# Supplementary material for: Comprehensive Analysis of the SBP Family in Blueberry and Their Regulatory Mechanism Controlling Chlorophyll Accumulation
Source: Front Plant Sci. 2021 Jul 1;12:703994. doi: 10.3389/fpls.2021.703994 (PMC8281205; doi:10.3389/fpls.2021.703994)
Supplement: Supplementary Table 3 — Similarity and identity between different VcSBP family members. [file Table_3.XLSX]

## Sheet: Sheet1
Table S3 Similarity and identity between different VcSBP family members
Gene ID	Gene ID	CDS (%)	CDS (%)	Protein (%)	Protein (%)
VcSBP12a	VcSBP12b	23.3	61.35	19.96	52.88
VcSBP2	VcSBP10	33.55	54.13	26.12	42.96
VcSBP3	VcSBP8b	21.27	50.39	18.38	41.9
VcSBP3	VcSBP5	47.19	59.19	43.15	56.67
VcSBP3	VcSBP8a	25.71	49.32	21.32	46.1
VcSBP8b	VcSBP5	27.63	51.38	20.91	40.47
VcSBP8b	VcSBP8a	43.07	45.8	26.74	30.42
VcSBP5	VcSBP8a	33.9	51.61	27.46	45.77
VcSBP9b	VcSBP9a	39.67	69.85	35.75	63.01
VcSBP7a	VcSBP7b	99.27	99.27	99.27	99.27
VcSBP7a	VcSBP14aAS	7.57	44.63	4.62	29.46
VcSBP7b	VcSBP14aAS	7.57	44.63	4.65	29.46
VcSBP14aAS	VcSBP14a	8.53	65.01	7.08	58.02
VcSBP6b	VcSBP6a	50.32	50.9	36.95	37.31
VcSBP6b	VcSBP6c	39.61	90.8	37.98	92.89
VcSBP6a	VcSBP6c	26.58	53.4	19.43	40.93
VcSBP13a	VcSBP13b	47.91	54.29	38.86	44.02
VcSBP14a	VcSBP14b	51.41	95.84	50.51	95.45
VcSBP14a	VcSBP14c	53.29	94.86	52.6	95.13
VcSBP14a	VcSBP14cAS	18.87	93.55	18.44	92.52
VcSBP14b	VcSBP14c	94.21	94.26	92.83	93.79
VcSBP14b	VcSBP14cAS	35.45	93.55	34.68	92.52
VcSBP14c	VcSBP14cAS	34.37	93.09	33.79	92.52
