# Supplementary material for: Comprehensive Analysis of the SBP Family in Blueberry and Their Regulatory Mechanism Controlling Chlorophyll Accumulation
Source: Front Plant Sci. 2021 Jul 1;12:703994. doi: 10.3389/fpls.2021.703994 (PMC8281205; doi:10.3389/fpls.2021.703994)
Supplement: Supplementary Table 4 — The predicted targets of the VcSBP family proteins in blueberry. [file Table_4.XLSX]

## Sheet: Sheet1
Table S4 The predicted targets of the VcSBP family proteins in blueberry
Query	Seed ortholog	e-value	score	description
maker-VaccDscaff62-snap-gene-4.32-mRNA-1	29760.VIT_19s0027g01670.t01	1.3e-33	149.8	Belongs to the cyclin family
augustus_masked-VaccDscaff62-processed-gene-8.11-mRNA-1	102107.XP_008218991.1	1.4e-29	136.0	Chaperone protein DNAj
augustus_masked-VaccDscaff79-processed-gene-5.0-mRNA-1	3641.EOY23100	6e-25	124.0	Plant mobile domain
augustus_masked-VaccDscaff79-processed-gene-6.6-mRNA-1	3641.EOY23100	3.8e-43	183.3	Plant mobile domain
maker-VaccDscaff311-snap-gene-0.45-mRNA-1	29760.VIT_01s0010g01030.t01	7.7e-67	261.5	F-box FBD LRR-repeat protein At1g13570-like
snap_masked-VaccDscaff311-processed-gene-0.24-mRNA-1	4098.XP_009594964.1	9.1e-52	211.1	F-box FBD LRR-repeat protein At1g13570-like
maker-VaccDscaff795-snap-gene-0.12-mRNA-1	4081.Solyc01g090240.2.1	1e-33	149.8	Serine/Threonine protein kinases, catalytic domain
maker-VaccDscaff10-augustus-gene-0.23-mRNA-1	3847.GLYMA02G46670.1	9.6e-145	519.6	Serine threonine-protein kinase
snap_masked-VaccDscaff10-processed-gene-7.19-mRNA-1	4113.PGSC0003DMT400002802	2.4e-24	118.2
maker-VaccDscaff10-snap-gene-15.46-mRNA-1	71139.XP_010064916.1	0.0	1272.7	G-type lectin S-receptor-like serine threonine-protein kinase
maker-VaccDscaff10-augustus-gene-15.38-mRNA-1	71139.XP_010064429.1	1.8e-171	609.4	G-type lectin S-receptor-like serine threonine-protein kinase
maker-VaccDscaff10-snap-gene-17.28-mRNA-1	4113.PGSC0003DMT400049634	1.9e-84	318.9	Universal stress protein family
maker-VaccDscaff10-snap-gene-24.34-mRNA-1	4081.Solyc05g012920.1.1	9.7e-41	175.6	Pentatricopeptide repeat-containing protein
augustus_masked-VaccDscaff10-processed-gene-33.10-mRNA-1	4432.XP_010242152.1	1.4e-14	85.5
maker-VaccDscaff10-snap-gene-40.39-mRNA-1	3649.evm.model.supercontig_332.5	2.7e-39	168.7	regulator of chromosome condensation (RCC1) family protein
snap_masked-VaccDscaff10-processed-gene-50.28-mRNA-1	29760.VIT_12s0057g00860.t01	6.1e-116	425.6	receptor-like protein 12
snap_masked-VaccDscaff10-processed-gene-55.27-mRNA-1	4098.XP_009628674.1	6.4e-203	714.5	Belongs to the formin-like family
maker-VaccDscaff10-snap-gene-56.27-mRNA-1	71139.XP_010035573.1	2.6e-111	408.7	Belongs to the peroxidase family. Classical plant peroxidase
augustus_masked-VaccDscaff10-processed-gene-60.3-mRNA-1	3885.XP_007140535.1	1.4e-15	91.3
maker-VaccDscaff10-snap-gene-62.43-mRNA-1	3750.XP_008379654.1	4.1e-121	440.7	BAH and coiled-coil domain-containing protein
maker-VaccDscaff10-snap-gene-68.42-mRNA-1	102107.XP_008229836.1	6e-238	830.1	Transcription initiation factor TFIID subunit
maker-VaccDscaff10-snap-gene-71.42-mRNA-1	71139.XP_010035573.1	6.9e-112	410.6	Belongs to the peroxidase family. Classical plant peroxidase
maker-VaccDscaff10-snap-gene-84.55-mRNA-1	4081.Solyc10g008580.1.1	1.3e-52	214.2	A Receptor for Ubiquitination Targets
maker-VaccDscaff10-snap-gene-95.41-mRNA-1	71139.XP_010044659.1	1.4e-12	78.6	Cysteine-rich and transmembrane domain-containing protein
augustus_masked-VaccDscaff10-processed-gene-98.0-mRNA-1	3641.EOY23100	4.1e-39	170.6	Plant mobile domain
augustus_masked-VaccDscaff10-processed-gene-100.1-mRNA-1	4098.XP_009629313.1	5.4e-125	455.7
maker-VaccDscaff10-augustus-gene-106.26-mRNA-1	71139.XP_010060705.1	3.1e-61	241.1	Multiprotein-bridging factor
maker-VaccDscaff10-snap-gene-108.37-mRNA-1	3694.POPTR_0005s15520.1	1.5e-13	82.4	Belongs to the protein kinase superfamily
augustus_masked-VaccDscaff10-processed-gene-151.4-mRNA-1	161934.XP_010675428.1	1.1e-10	73.6	Ribonuclease H protein
maker-VaccDscaff10-augustus-gene-160.17-mRNA-1	85681.XP_006430523.1	2e-130	472.6	mediator of RNA polymerase II transcription subunit
snap_masked-VaccDscaff10-processed-gene-171.11-mRNA-1	2711.XP_006482021.1	6.2e-57	227.3	Werner syndrome-like exonuclease
maker-VaccDscaff10-augustus-gene-175.17-mRNA-1	29760.VIT_08s0056g00050.t01	1.5e-213	749.6	Belongs to the GRAS family
augustus_masked-VaccDscaff10-processed-gene-178.11-mRNA-1	3760.EMJ13720	1.4e-41	176.8	Plant mobile domain
maker-VaccDscaff10-snap-gene-190.26-mRNA-1	29760.VIT_08s0058g00700.t01	9.3e-169	600.5	F-box LRR-repeat protein
maker-VaccDscaff10-augustus-gene-195.14-mRNA-1	4155.Migut.J00712.1.p	3.5e-69	268.1	Late embryogenesis abundant protein
maker-VaccDscaff10-augustus-gene-196.19-mRNA-1	29760.VIT_08s0007g02130.t01	0.0	1103.6	phosphoprotein phosphatase activity
augustus_masked-VaccDscaff10-processed-gene-197.2-mRNA-1	3760.EMJ27390	2.5e-36	161.4	Plant mobile domain
augustus_masked-VaccDscaff10-processed-gene-203.2-mRNA-1	3641.EOY23100	5.6e-21	109.8	Plant mobile domain
augustus_masked-VaccDscaff10-processed-gene-221.2-mRNA-1	29760.VIT_08s0040g01670.t01	1.9e-42	178.3	Indole-3-acetic acid-induced protein
augustus_masked-VaccDscaff10-processed-gene-222.4-mRNA-1	3641.EOY23100	3.1e-39	171.0	Plant mobile domain
maker-VaccDscaff10-augustus-gene-226.29-mRNA-1	102107.XP_008243930.1	3.8e-116	424.9	E3 ubiquitin-protein ligase
augustus_masked-VaccDscaff10-processed-gene-228.6-mRNA-1	3760.EMJ27390	3.5e-36	159.8	Plant mobile domain
maker-VaccDscaff10-snap-gene-236.27-mRNA-1	4432.XP_010259976.1	5.1e-56	224.6	Putative zinc- or iron-chelating domain
augustus_masked-VaccDscaff10-processed-gene-236.0-mRNA-1	3760.EMJ27390	3.9e-27	130.6	Plant mobile domain
maker-VaccDscaff10-augustus-gene-258.28-mRNA-1	29730.Gorai.009G302600.1	5.9e-68	264.6	Pentatricopeptide repeat-containing protein
maker-VaccDscaff10-snap-gene-258.40-mRNA-1	4555.Si031695m	2.9e-33	147.9	Tim10/DDP family zinc finger
maker-VaccDscaff10-augustus-gene-271.28-mRNA-1	29730.Gorai.011G178800.1	2.8e-92	344.7	Initiation factor
maker-VaccDscaff10-augustus-gene-274.24-mRNA-1	29760.VIT_05s0049g01660.t01	2e-112	412.9	heterogeneous nuclear ribonucleoprotein
maker-VaccDscaff10-snap-gene-279.34-mRNA-1	3694.POPTR_0014s10510.1	1.2e-216	759.6	transcription factor
maker-VaccDscaff10-augustus-gene-323.27-mRNA-1	29760.VIT_05s0020g04500.t01	5e-122	444.5	Plant-specific domain TIGR01615 family protein
maker-VaccDscaff10-augustus-gene-325.22-mRNA-1	29760.VIT_05s0020g04180.t01	0.0	1263.4	Leucine-rich repeat protein kinase family protein
snap_masked-VaccDscaff10-processed-gene-327.12-mRNA-1	2711.XP_006494494.1	5.9e-33	148.3	F-box protein
maker-VaccDscaff10-augustus-gene-342.29-mRNA-1	4098.XP_009626058.1	0.0	1424.8	Plant lipoxygenase
snap_masked-VaccDscaff10-processed-gene-345.25-mRNA-1	4081.Solyc01g080130.2.1	3.5e-234	817.8
snap_masked-VaccDscaff10-processed-gene-348.15-mRNA-1	71139.XP_010045077.1	3.5e-65	254.2	Belongs to the cytochrome P450 family
snap_masked-VaccDscaff10-processed-gene-348.17-mRNA-1	4530.OS06T0642400-00	3e-09	68.2
maker-VaccDscaff10-snap-gene-349.28-mRNA-1	225117.XP_009365790.1	1.3e-53	216.1	1,4-beta-D-glucanase-like
augustus_masked-VaccDscaff10-processed-gene-353.7-mRNA-1	3694.POPTR_0006s01360.1	4.2e-47	195.7	f-box protein
maker-VaccDscaff10-snap-gene-354.49-mRNA-1	85681.XP_006419760.1	2.4e-286	991.1	Belongs to the adaptor complexes medium subunit family
maker-VaccDscaff10-snap-gene-354.45-mRNA-1	4155.Migut.D01866.1.p	5.7e-80	305.4	F-box associated domain
maker-VaccDscaff10-snap-gene-355.29-mRNA-1	4538.ORGLA01G0200700.1	1.7e-31	144.4	Plant transposase (Ptta/En/Spm family)
maker-VaccDscaff10-augustus-gene-362.31-mRNA-1	102107.XP_008223108.1	7.2e-139	500.4
maker-VaccDscaff10-augustus-gene-363.27-mRNA-1	3988.XP_002531424.1	2.9e-132	479.9	LRR receptor-like serine threonine-protein kinase At3g47570
maker-VaccDscaff10-augustus-gene-369.17-mRNA-1	4096.XP_009763085.1	3.9e-259	902.1	zinc ion binding protein
maker-VaccDscaff10-augustus-gene-373.30-mRNA-1	3641.EOY06551	6.3e-53	213.4	60S ribosomal Protein
maker-VaccDscaff10-snap-gene-377.37-mRNA-1	81985.XP_006283220.1	4.3e-239	834.3	epoxide hydrolase
maker-VaccDscaff10-augustus-gene-382.18-mRNA-1	3694.POPTR_0010s00290.1	7.6e-82	310.8	Protein of unknown function (DUF789)
augustus_masked-VaccDscaff10-processed-gene-383.2-mRNA-1	4096.XP_009768396.1	1.1e-15	90.1	Domain of unknown function (DUF3511)
augustus_masked-VaccDscaff10-processed-gene-383.1-mRNA-1	29760.VIT_05s0077g01390.t01	7.7e-26	123.6	Zinc finger protein
maker-VaccDscaff10-snap-gene-386.47-mRNA-1	29760.VIT_05s0077g01000.t01	4.7e-107	396.4	Fip1 motif
maker-VaccDscaff10-snap-gene-398.35-mRNA-1	2711.XP_006488740.1	1.2e-165	589.3	sugar phosphate phosphate translocator
maker-VaccDscaff126-snap-gene-0.30-mRNA-1	3694.POPTR_0009s12690.1	8.4e-234	816.2	Endoglucanase
maker-VaccDscaff8-augustus-gene-8.34-mRNA-1	3847.GLYMA02G46670.1	3e-144	518.1	Serine threonine-protein kinase
augustus_masked-VaccDscaff8-processed-gene-21.2-mRNA-1	29760.VIT_06s0009g03670.t01	4e-16	91.7	F-Box protein
snap_masked-VaccDscaff8-processed-gene-31.11-mRNA-1	225117.XP_009362951.1	0.0	1203.3	Pentatricopeptide repeat-containing protein
snap_masked-VaccDscaff8-processed-gene-31.13-mRNA-1	3694.POPTR_0011s12380.1	9.6e-72	276.6	TIR domain
maker-VaccDscaff8-snap-gene-27.53-mRNA-1	29760.VIT_19s0014g03670.t01	1.5e-75	290.4
augustus_masked-VaccDscaff8-processed-gene-22.8-mRNA-1	71139.XP_010064429.1	2.4e-218	765.4	G-type lectin S-receptor-like serine threonine-protein kinase
augustus_masked-VaccDscaff8-processed-gene-37.7-mRNA-1	29730.Gorai.001G244000.1	6.3e-79	300.4	Glutamine phosphoribosylpyrophosphate amidotransferase
augustus_masked-VaccDscaff8-processed-gene-41.4-mRNA-1	4432.XP_010242152.1	4.9e-15	87.0
snap_masked-VaccDscaff8-processed-gene-52.13-mRNA-1	3827.XP_004488642.1	7.4e-14	83.2	VQ motif
maker-VaccDscaff8-snap-gene-47.49-mRNA-1	29760.VIT_12s0057g01490.t01	2.9e-67	263.8	SWI3, ADA2, N-CoR and TFIIIB'' DNA-binding domains
maker-VaccDscaff8-snap-gene-48.41-mRNA-1	981085.XP_010091131.1	1.4e-291	1009.6	Ubiquitin carboxyl-terminal hydrolase
augustus_masked-VaccDscaff8-processed-gene-66.3-mRNA-1	102107.XP_008223140.1	1.9e-56	226.9	F-box protein At3g07870-like
maker-VaccDscaff8-snap-gene-65.30-mRNA-1	4432.XP_010252681.1	1.4e-154	553.1	Cytochrome b561 and DOMON domain-containing protein
maker-VaccDscaff8-augustus-gene-72.36-mRNA-1	71139.XP_010035573.1	1.4e-112	412.9	Belongs to the peroxidase family
augustus_masked-VaccDscaff8-processed-gene-63.8-mRNA-1	225117.XP_009356034.1	2.5e-21	109.0	Domain of unknown function (DUF4539)
maker-VaccDscaff8-augustus-gene-64.34-mRNA-1	3988.XP_002531690.1	2.4e-139	501.5	Chlorophyll a-b binding protein
maker-VaccDscaff8-snap-gene-75.41-mRNA-1	102107.XP_008229836.1	2.5e-236	824.7	Transcription initiation factor TFIID subunit
maker-VaccDscaff8-snap-gene-81.33-mRNA-1	3750.XP_008379654.1	1.4e-121	442.2	BAH and coiled-coil domain-containing protein
augustus_masked-VaccDscaff8-processed-gene-87.7-mRNA-1	3880.AES82110	1.6e-15	91.3	Ribonuclease H protein
maker-VaccDscaff8-augustus-gene-77.23-mRNA-1	2711.XP_006480308.1	1.6e-127	463.0	Belongs to the protein kinase superfamily
maker-VaccDscaff8-augustus-gene-97.22-mRNA-1	71139.XP_010035573.1	3.3e-114	418.3	Belongs to the peroxidase family
maker-VaccDscaff8-augustus-gene-116.19-mRNA-1	4155.Migut.M00158.1.p	6e-185	653.7	Aminotransferase class I and II
augustus_masked-VaccDscaff8-processed-gene-133.4-mRNA-1	3760.EMJ27390	6.2e-38	166.8	Plant mobile domain
maker-VaccDscaff8-snap-gene-129.39-mRNA-1	71139.XP_010060705.1	1.4e-61	242.3	Multiprotein-bridging factor
maker-VaccDscaff8-snap-gene-153.32-mRNA-1	29760.VIT_08s0007g08120.t01	0.0	1345.5	exostosin family
maker-VaccDscaff8-augustus-gene-178.18-mRNA-1	85681.XP_006430523.1	6.8e-134	484.2	mediator of RNA polymerase II transcription subunit
maker-VaccDscaff8-augustus-gene-203.18-mRNA-1	29760.VIT_08s0058g00700.t01	5.7e-174	617.8	F-box LRR-repeat protein
maker-VaccDscaff8-augustus-gene-195.24-mRNA-1	3641.EOY04461	1.5e-201	709.1	receptor-like protein kinase
maker-VaccDscaff8-augustus-gene-202.21-mRNA-1	2711.XP_006490317.1	2.8e-162	578.6	Spinocerebellar ataxia type 10 protein domain
maker-VaccDscaff8-snap-gene-209.29-mRNA-1	29760.VIT_08s0007g02130.t01	0.0	1119.0	phosphoprotein phosphatase activity
maker-VaccDscaff8-snap-gene-223.25-mRNA-1	225117.XP_009378231.1	2.7e-260	905.2	Pentatricopeptide repeat-containing protein
augustus_masked-VaccDscaff8-processed-gene-224.8-mRNA-1	3641.EOY23100	6.8e-34	153.3	Plant mobile domain
augustus_masked-VaccDscaff8-processed-gene-234.2-mRNA-1	29760.VIT_08s0040g01670.t01	2.9e-43	181.0	Indole-3-acetic acid-induced protein
maker-VaccDscaff8-snap-gene-238.69-mRNA-1	3880.AES97346	1.8e-13	82.0
augustus_masked-VaccDscaff8-processed-gene-251.6-mRNA-1	3641.EOY23100	2.9e-18	99.0	Plant mobile domain
maker-VaccDscaff8-snap-gene-253.23-mRNA-1	29760.VIT_08s0040g02870.t01	1.2e-55	224.2	Putative zinc- or iron-chelating domain
maker-VaccDscaff8-snap-gene-278.16-mRNA-1	4081.Solyc09g013080.2.1	3.5e-173	615.5	a carboxylase
maker-VaccDscaff8-snap-gene-276.39-mRNA-1	4555.Si031695m	1.8e-33	148.7	Tim10/DDP family zinc finger
maker-VaccDscaff8-snap-gene-283.36-mRNA-1	29730.Gorai.011G178800.1	1e-86	326.2	Initiation factor
maker-VaccDscaff8-augustus-gene-279.41-mRNA-1	4098.XP_009602210.1	3.5e-174	618.2	Major Facilitator Superfamily
maker-VaccDscaff8-snap-gene-290.31-mRNA-1	29760.VIT_05s0049g01660.t01	2.5e-112	412.5	heterogeneous nuclear ribonucleoprotein
snap_masked-VaccDscaff8-processed-gene-302.7-mRNA-1	4432.XP_010243133.1	1.9e-163	582.8	Uncharacterised conserved protein UCP015417
snap_masked-VaccDscaff8-processed-gene-302.8-mRNA-1	3641.EOY04076	2.2e-39	171.0	Plant mobile domain
maker-VaccDscaff8-augustus-gene-296.29-mRNA-1	3641.EOX95515	3.1e-217	761.5	transcription factor
maker-VaccDscaff8-augustus-gene-315.15-mRNA-1	29760.VIT_18s0001g01370.t01	1.5e-27	129.8	Wall-associated receptor kinase
snap_masked-VaccDscaff8-processed-gene-315.10-mRNA-1	3641.EOY23100	6.1e-20	104.4	Plant mobile domain
augustus_masked-VaccDscaff8-processed-gene-328.3-mRNA-1	57918.XP_004291774.1	2.2e-20	107.8	Serine threonine-protein phosphatase 7 long form homolog
maker-VaccDscaff8-augustus-gene-336.9-mRNA-1	29760.VIT_05s0020g04500.t01	1.3e-117	429.9	Plant-specific domain TIGR01615 family protein
maker-VaccDscaff8-augustus-gene-335.17-mRNA-1	29760.VIT_14s0030g01670.t01	2.8e-207	728.0	26S proteasome non-ATPase regulatory subunit
maker-VaccDscaff8-augustus-gene-338.13-mRNA-1	29760.VIT_05s0020g04180.t01	0.0	1259.2	Leucine-rich repeat protein kinase family protein
maker-VaccDscaff8-augustus-gene-346.24-mRNA-1	29730.Gorai.013G065800.1	1.1e-08	66.2	Encoded by
maker-VaccDscaff8-snap-gene-331.45-mRNA-1	3760.EMJ05988	2.4e-72	281.2	ankyrin repeat-containing protein
maker-VaccDscaff8-augustus-gene-340.35-mRNA-1	4432.XP_010244251.1	3.5e-31	142.5	F-box protein
snap_masked-VaccDscaff8-processed-gene-357.14-mRNA-1	4081.Solyc01g080130.2.1	9.3e-232	809.7
snap_masked-VaccDscaff8-processed-gene-361.12-mRNA-1	71139.XP_010045077.1	4.2e-84	317.4	Belongs to the cytochrome P450 family
maker-VaccDscaff8-augustus-gene-367.36-mRNA-1	29760.VIT_05s0020g02400.t01	4.6e-109	402.1	F-box LRR-repeat protein
maker-VaccDscaff8-snap-gene-372.37-mRNA-1	3988.XP_002520704.1	2.7e-192	678.7	Removal of H(2)O(2), oxidation of toxic reductants
augustus_masked-VaccDscaff8-processed-gene-377.7-mRNA-1	85681.XP_006437543.1	3e-126	459.9	Belongs to the protein kinase superfamily
maker-VaccDscaff8-snap-gene-376.19-mRNA-1	29760.VIT_08s0007g02110.t01	4.5e-158	566.6	Belongs to the protein kinase superfamily
maker-VaccDscaff8-augustus-gene-371.35-mRNA-1	4098.XP_009610113.1	2.8e-54	219.2	splicing factor
maker-VaccDscaff8-snap-gene-384.33-mRNA-1	29760.VIT_05s0020g01360.t01	1.1e-198	700.7	BEST Arabidopsis thaliana protein match is
maker-VaccDscaff8-augustus-gene-384.24-mRNA-1	4096.XP_009763085.1	4.3e-263	915.2	zinc ion binding protein
maker-VaccDscaff8-augustus-gene-389.32-mRNA-1	2711.XP_006489040.1	9.7e-143	513.1	epoxide hydrolase
maker-VaccDscaff8-augustus-gene-390.25-mRNA-1	3659.XP_004136019.1	4.6e-93	347.4	Belongs to the eukaryotic ribosomal protein eL19 family
augustus_masked-VaccDscaff8-processed-gene-395.0-mRNA-1	29760.VIT_05s0077g01390.t01	5.9e-26	124.0	Zinc finger protein
augustus_masked-VaccDscaff8-processed-gene-395.1-mRNA-1	4096.XP_009768396.1	1.3e-11	76.6	Domain of unknown function (DUF3511)
maker-VaccDscaff8-snap-gene-393.38-mRNA-1	3694.POPTR_0010s00290.1	2.4e-91	342.8	Protein of unknown function (DUF789)
maker-VaccDscaff8-augustus-gene-407.33-mRNA-1	29760.VIT_05s0020g00400.t01	2.6e-262	911.4	Beta-13-galactosyltransferase
maker-VaccDscaff8-snap-gene-405.45-mRNA-1	3649.evm.model.supercontig_9.15	2.2e-10	72.8	Pentatricopeptide repeat-containing protein
maker-VaccDscaff8-snap-gene-410.35-mRNA-1	29760.VIT_05s0020g00560.t01	0.0	2281.1	Inactive serine threonine-protein kinase
maker-VaccDscaff8-snap-gene-411.31-mRNA-1	2711.XP_006488740.1	1.2e-165	589.3	sugar phosphate phosphate translocator
maker-VaccDscaff22-augustus-gene-11.25-mRNA-1	3694.POPTR_0002s21870.1	1.7e-75	288.5	Seems to be required for maximal rate of protein biosynthesis
maker-VaccDscaff22-augustus-gene-16.39-mRNA-1	2711.XP_006491165.1	7e-230	803.1	Belongs to the glycosyl hydrolase 28 family
maker-VaccDscaff22-augustus-gene-18.26-mRNA-1	29760.VIT_15s0046g02280.t01	1.3e-83	315.8	Belongs to the ubiquitin-conjugating enzyme family
maker-VaccDscaff22-snap-gene-24.49-mRNA-1	3656.XP_008438064.1	9.6e-109	399.4	Cleavage and polyadenylation specificity factor subunit
maker-VaccDscaff22-augustus-gene-24.33-mRNA-1	3760.EMJ19234	3.9e-139	501.5	tRNA-specific adenosine deaminase
snap_masked-VaccDscaff22-processed-gene-31.16-mRNA-1	3641.EOX99448	2.5e-121	442.2	O-acyltransferase (WSD1-like)
augustus_masked-VaccDscaff22-processed-gene-32.6-mRNA-1	29760.VIT_15s0048g01400.t01	1.2e-171	610.1	receptor-like serine threonine-protein kinase
maker-VaccDscaff22-augustus-gene-33.51-mRNA-1	29730.Gorai.006G136100.1	2.8e-43	182.6	DNA-templated transcriptional preinitiation complex assembly
maker-VaccDscaff22-snap-gene-39.43-mRNA-1	4098.XP_009628687.1	5.2e-202	710.7	Plant protein of unknown function (DUF641)
snap_masked-VaccDscaff22-processed-gene-49.18-mRNA-1	3983.cassava4.1_030473m	2e-22	113.2
snap_masked-VaccDscaff22-processed-gene-49.22-mRNA-1	29760.VIT_14s0068g00070.t01	1.8e-10	71.6	receptor-like protein kinase
snap_masked-VaccDscaff22-processed-gene-49.23-mRNA-1	4432.XP_010253388.1	4.1e-13	80.1	belongs to the protein kinase superfamily
snap_masked-VaccDscaff22-processed-gene-49.24-mRNA-1	161934.XP_010694005.1	6.8e-07	60.1	receptor-like protein kinase
maker-VaccDscaff22-snap-gene-49.46-mRNA-1	29760.VIT_01s0244g00090.t01	8.2e-25	120.6	receptor-like protein kinase
maker-VaccDscaff22-augustus-gene-51.47-mRNA-1	4096.XP_009788621.1	3.1e-35	154.5	Non-specific lipid-transfer protein
snap_masked-VaccDscaff22-processed-gene-51.36-mRNA-1	4432.XP_010275440.1	1.6e-294	1018.5	serine threonine-protein kinase
maker-VaccDscaff22-snap-gene-81.46-mRNA-1	29760.VIT_03s0088g00140.t01	6.7e-120	437.6	synthase 1-like
augustus_masked-VaccDscaff22-processed-gene-91.2-mRNA-1	29730.Gorai.009G312700.1	6.3e-224	784.6	disease resistance
augustus_masked-VaccDscaff22-processed-gene-104.0-mRNA-1	4432.XP_010278101.1	6.3e-34	152.5	Pentatricopeptide repeat-containing protein
augustus_masked-VaccDscaff22-processed-gene-115.0-mRNA-1	218851.Aquca_028_00093.1	2.4e-85	323.6	Domain of unknown function (DUF4220)
maker-VaccDscaff22-snap-gene-119.46-mRNA-1	4006.Lus10008499	2.6e-39	168.7	Belongs to the glutathione peroxidase family
maker-VaccDscaff22-augustus-gene-124.22-mRNA-1	3885.XP_007158463.1	1.4e-209	735.7	Cytochrome p450
snap_masked-VaccDscaff22-processed-gene-133.19-mRNA-1	28532.XP_010529513.1	9.9e-42	176.4	zinc finger A20 and AN1 domain-containing protein
maker-VaccDscaff22-snap-gene-161.32-mRNA-1	4432.XP_010244060.1	1.6e-217	763.1	serine threonine-protein kinase cdc7
augustus_masked-VaccDscaff22-processed-gene-173.10-mRNA-1	3641.EOY23100	1.1e-16	95.1	Plant mobile domain
maker-VaccDscaff22-augustus-gene-177.35-mRNA-1	4538.ORGLA01G0200700.1	7.8e-36	158.7	Plant transposase (Ptta/En/Spm family)
snap_masked-VaccDscaff22-processed-gene-190.18-mRNA-1	225117.XP_009356034.1	3.2e-15	89.4	Domain of unknown function (DUF4539)
snap_masked-VaccDscaff22-processed-gene-198.29-mRNA-1	85681.XP_006430895.1	1.9e-81	309.3	Protein kinase domain
augustus_masked-VaccDscaff22-processed-gene-204.0-mRNA-1	29760.VIT_04s0008g01260.t01	2.3e-149	535.4	zinc transporter
snap_masked-VaccDscaff22-processed-gene-205.12-mRNA-1	5297.GMQ_04369T0	2e-08	66.2
maker-VaccDscaff22-augustus-gene-207.23-mRNA-1	4432.XP_010254980.1	2.6e-219	768.1	DA1-related
maker-VaccDscaff22-snap-gene-231.18-mRNA-1	4432.XP_010248008.1	0.0	1138.6	Replication factor C subunit
maker-VaccDscaff22-augustus-gene-232.17-mRNA-1	225117.XP_009368358.1	0.0	1761.1	serine threonine-protein phosphatase
maker-VaccDscaff22-augustus-gene-256.32-mRNA-1	264402.Cagra.0618s0007.1.p	1.5e-08	66.2	Serine threonine-protein phosphatase 7 long form homolog
augustus_masked-VaccDscaff22-processed-gene-262.4-mRNA-1	4098.XP_009598671.1	1.6e-159	569.3	Methyltransferase domain
maker-VaccDscaff22-augustus-gene-265.21-mRNA-1	29760.VIT_06s0004g03280.t01	2.5e-84	318.2	Broad-specificity nucleoside monophosphate (NMP) kinase
augustus_masked-VaccDscaff22-processed-gene-271.9-mRNA-1	4081.Solyc11g072830.1.1	1.5e-113	416.0	Glycosyl hydrolases family 18
augustus_masked-VaccDscaff22-processed-gene-285.3-mRNA-1	3988.XP_002520526.1	3.1e-244	851.3	L-type lectin-domain containing receptor kinase
augustus_masked-VaccDscaff22-processed-gene-286.2-mRNA-1	981085.XP_010089954.1	5.6e-25	123.6	CHD3-type chromatin-remodeling factor
maker-VaccDscaff22-snap-gene-288.34-mRNA-1	3760.EMJ07794	2e-134	487.3	UDP-glycosyltransferase 76E2-like
maker-VaccDscaff22-snap-gene-290.37-mRNA-1	102107.XP_008220423.1	5.1e-269	933.3	Lignin degradation and detoxification of lignin-derived products
maker-VaccDscaff22-snap-gene-307.40-mRNA-1	3641.EOX93679	7.7e-181	640.2	Acyl-coenzyme A thioesterase 9
maker-VaccDscaff22-augustus-gene-312.32-mRNA-1	3694.POPTR_0002s24990.1	4.2e-108	398.7	transcription factor
maker-VaccDscaff22-augustus-gene-332.53-mRNA-1	4098.XP_009614586.1	8.7e-248	862.8	Pre-mRNA splicing Prp18-interacting factor
augustus_masked-VaccDscaff246-processed-gene-0.13-mRNA-1	29730.Gorai.011G031900.1	4.6e-63	248.4	Glutamate-gated receptor
maker-VaccDscaff827-snap-gene-0.12-mRNA-1	29760.VIT_19s0014g05430.t01	8.5e-07	61.6	NDR1-like
maker-VaccDscaff38-snap-gene-1.19-mRNA-1	29760.VIT_11s0037g00560.t01	5.4e-171	607.8	QWRF motif-containing protein
snap_masked-VaccDscaff38-processed-gene-2.25-mRNA-1	3983.cassava4.1_006971m	2.5e-76	292.0	Belongs to the multicopper oxidase family
augustus_masked-VaccDscaff38-processed-gene-4.3-mRNA-1	4098.XP_009602470.1	3.8e-70	272.3	Vinorine synthase-like
augustus_masked-VaccDscaff38-processed-gene-5.3-mRNA-1	4432.XP_010265527.1	1.7e-84	319.3	shikimate
maker-VaccDscaff38-augustus-gene-6.25-mRNA-1	3988.XP_002529405.1	2.2e-38	166.8	U1-like zinc finger
maker-VaccDscaff38-augustus-gene-7.33-mRNA-1	3641.EOY29544	0.0	1130.9	Belongs to the nonaspanin (TM9SF) (TC 9.A.2) family
maker-VaccDscaff38-augustus-gene-15.23-mRNA-1	3988.XP_002528386.1	0.0	1971.8	Translation initiation factor eIF3 subunit 135
maker-VaccDscaff38-snap-gene-37.51-mRNA-1	3983.cassava4.1_032094m	6.1e-253	881.3	disease resistance
augustus_masked-VaccDscaff38-processed-gene-58.2-mRNA-1	4432.XP_010254613.1	9.2e-230	803.1	L-type lectin-domain containing receptor kinase
augustus_masked-VaccDscaff38-processed-gene-66.7-mRNA-1	3988.XP_002533956.1	9e-23	112.8
maker-VaccDscaff38-snap-gene-72.26-mRNA-1	102107.XP_008235290.1	2e-247	861.7	Belongs to the glycosyl hydrolase 5 (cellulase A) family
maker-VaccDscaff38-snap-gene-87.35-mRNA-1	4081.Solyc04g054520.2.1	6.9e-61	240.7	peptidyl-prolyl cis-trans isomerase
snap_masked-VaccDscaff38-processed-gene-95.22-mRNA-1	71139.XP_010025709.1	1.8e-131	476.1	Belongs to the peptidase A1 family
augustus_masked-VaccDscaff38-processed-gene-97.2-mRNA-1	29760.VIT_19s0015g01160.t01	1.4e-34	152.9	phosphatidylinositol phosphatidylcholine transfer protein
maker-VaccDscaff38-augustus-gene-99.32-mRNA-1	29760.VIT_07s0031g01780.t01	3.3e-218	764.6	tRNAHis guanylyltransferase
maker-VaccDscaff38-augustus-gene-118.47-mRNA-1	71139.XP_010025693.1	0.0	1290.0	Chloride channel protein
maker-VaccDscaff38-augustus-gene-123.30-mRNA-1	3983.cassava4.1_011149m	7.1e-136	490.3	isoform X1
maker-VaccDscaff38-augustus-gene-126.27-mRNA-1	29760.VIT_04s0044g01330.t01	1.1e-148	533.1	GDP-mannose transporter
maker-VaccDscaff38-augustus-gene-132.16-mRNA-1	29760.VIT_14s0128g00370.t01	4e-232	810.4	Serine--tRNA
augustus_masked-VaccDscaff38-processed-gene-141.6-mRNA-1	3641.EOX91036	2.4e-103	384.4	Auxilin-like protein 1
maker-VaccDscaff38-augustus-gene-149.19-mRNA-1	85681.XP_006445975.1	0.0	1230.3	Multiple C2 and transmembrane domain-containing protein
maker-VaccDscaff38-snap-gene-150.29-mRNA-1	3641.EOY32490	1.3e-282	979.5	G-type lectin S-receptor-like serine threonine-protein kinase
maker-VaccDscaff38-snap-gene-153.26-mRNA-1	264402.Cagra.3166s0071.1.p	3.2e-24	118.2	Belongs to the small GTPase superfamily. Arf family
augustus_masked-VaccDscaff38-processed-gene-158.9-mRNA-1	4432.XP_010275010.1	4.9e-13	82.4
augustus_masked-VaccDscaff38-processed-gene-174.0-mRNA-1	3760.EMJ27390	5.7e-39	170.2	Plant mobile domain
augustus_masked-VaccDscaff38-processed-gene-175.1-mRNA-1	161934.XP_010677018.1	3.2e-08	65.1	Ribonuclease H protein
maker-VaccDscaff38-augustus-gene-209.29-mRNA-1	4081.Solyc07g055290.2.1	6.5e-32	143.3	Rab subfamily of small GTPases
augustus_masked-VaccDscaff38-processed-gene-217.5-mRNA-1	3694.POPTR_0019s12110.1	6.5e-53	214.5	transcription factor
maker-VaccDscaff38-augustus-gene-218.39-mRNA-1	3760.EMJ15443	2.2e-113	415.6	Belongs to the peptidase C1 family
snap_masked-VaccDscaff38-processed-gene-228.13-mRNA-1	3827.XP_004516681.1	3.4e-11	74.3	O-acyltransferase (WSD1-like)
maker-VaccDscaff38-snap-gene-231.30-mRNA-1	3760.EMJ21674	3.5e-11	74.7	21 kDa protein-like
maker-VaccDscaff38-augustus-gene-243.28-mRNA-1	29760.VIT_12s0134g00400.t01	6.8e-32	144.4	Zinc finger protein
augustus_masked-VaccDscaff38-processed-gene-246.4-mRNA-1	29760.VIT_12s0057g00150.t01	2.8e-18	97.8	Wound induced protein
augustus_masked-VaccDscaff38-processed-gene-246.6-mRNA-1	29760.VIT_12s0057g00150.t01	4.7e-31	140.2	Wound induced protein
maker-VaccDscaff38-snap-gene-247.21-mRNA-1	981085.XP_010099885.1	3.8e-28	133.3	LRR-repeat protein
snap_masked-VaccDscaff38-processed-gene-248.11-mRNA-1	3827.XP_004490630.1	2.3e-19	100.9	Belongs to the ubiquitin-activating E1 family
maker-VaccDscaff38-augustus-gene-259.38-mRNA-1	3641.EOY04547	9.8e-149	533.1	2-alkenal reductase (NADP( )-dependent)-like
maker-VaccDscaff38-snap-gene-261.33-mRNA-1	85681.XP_006446691.1	0.0	1162.1	26S proteasome non-ATPase regulatory subunit 2
maker-VaccDscaff38-augustus-gene-277.21-mRNA-1	2711.XP_006469501.1	9.1e-205	719.9	zinc finger CCCH domain-containing protein
augustus_masked-VaccDscaff38-processed-gene-278.1-mRNA-1	29760.VIT_12s0057g00710.t01	1.2e-243	849.4	DNAJ heat shock N-terminal domain-containing protein
maker-VaccDscaff38-snap-gene-283.32-mRNA-1	3694.POPTR_0014s16800.1	2.4e-121	442.2	U-box domain-containing protein
maker-VaccDscaff38-augustus-gene-288.29-mRNA-1	161934.XP_010694843.1	1.1e-70	273.1	Belongs to the Casparian strip membrane proteins (CASP) family
maker-VaccDscaff258-augustus-gene-0.55-mRNA-1	4432.XP_010277770.1	5.1e-291	1006.5	ketol-acid reductoisomerase
maker-VaccDscaff43-snap-gene-10.42-mRNA-1	85681.XP_006444317.1	2.2e-138	499.2	Phytochrome A-associated F-box
maker-VaccDscaff43-augustus-gene-12.29-mRNA-1	3750.XP_008386867.1	1.3e-59	235.7	IMPACT family member in pol
augustus_masked-VaccDscaff43-processed-gene-26.2-mRNA-1	29760.VIT_07s0151g00310.t01	1e-265	922.5	serine threonine-protein kinase
maker-VaccDscaff43-augustus-gene-20.29-mRNA-1	29760.VIT_07s0104g00390.t01	0.0	1895.6	mediator of RNA polymerase II transcription subunit
snap_masked-VaccDscaff43-processed-gene-42.15-mRNA-1	4098.XP_009620696.1	9.6e-08	63.5	gag-polypeptide of LTR copia-type
snap_masked-VaccDscaff43-processed-gene-40.24-mRNA-1	4098.XP_009614586.1	9.3e-238	829.7	Pre-mRNA splicing Prp18-interacting factor
maker-VaccDscaff43-snap-gene-48.47-mRNA-1	3694.POPTR_0013s00420.1	1.1e-60	240.4	protease
maker-VaccDscaff43-augustus-gene-48.39-mRNA-1	3694.POPTR_0013s00420.1	1.2e-60	240.4	protease
snap_masked-VaccDscaff43-processed-gene-65.30-mRNA-1	7209.EJD75841.1	7e-08	64.3	regulation of RNA splicing
maker-VaccDscaff43-snap-gene-64.40-mRNA-1	3694.POPTR_0002s24990.1	2.8e-106	392.9	transcription factor
maker-VaccDscaff43-augustus-gene-62.29-mRNA-1	3760.EMJ01248	1.1e-159	570.1	Cytochrome p450
maker-VaccDscaff43-augustus-gene-87.28-mRNA-1	102107.XP_008221415.1	1.4e-209	735.7	Pentatricopeptide repeat-containing protein At2g30100
maker-VaccDscaff43-augustus-gene-116.33-mRNA-1	4081.Solyc11g072830.1.1	6.4e-112	410.6	Glycosyl hydrolases family 18
augustus_masked-VaccDscaff43-processed-gene-124.6-mRNA-1	4098.XP_009598671.1	1.5e-160	572.8	Methyltransferase domain
maker-VaccDscaff43-augustus-gene-130.36-mRNA-1	29760.VIT_06s0061g00280.t01	4.5e-303	1047.0	protein DDB_G0273453 DDB_G0273565-like
maker-VaccDscaff43-snap-gene-140.28-mRNA-1	4096.XP_009775655.1	9.9e-84	316.2	ribosomal protein L24, mitochondrial
maker-VaccDscaff43-augustus-gene-132.32-mRNA-1	4098.XP_009603383.1	5.4e-141	507.3	AMP-binding enzyme C-terminal domain
augustus_masked-VaccDscaff43-processed-gene-132.7-mRNA-1	2711.XP_006488032.1	6.9e-70	270.4	4-coumarate--CoA ligase-like
maker-VaccDscaff43-augustus-gene-121.39-mRNA-1	29760.VIT_06s0004g03280.t01	8.6e-85	319.7	Broad-specificity nucleoside monophosphate (NMP) kinase
maker-VaccDscaff43-augustus-gene-146.15-mRNA-1	225117.XP_009368358.1	0.0	1739.5	serine threonine-protein phosphatase
augustus_masked-VaccDscaff43-processed-gene-159.13-mRNA-1	4432.XP_010275010.1	5.3e-17	95.5
maker-VaccDscaff43-snap-gene-147.22-mRNA-1	4432.XP_010248008.1	0.0	1139.0	Replication factor C subunit
maker-VaccDscaff43-augustus-gene-172.22-mRNA-1	71139.XP_010058384.1	1.2e-118	433.0	Protein kinase domain
snap_masked-VaccDscaff43-processed-gene-176.21-mRNA-1	4432.XP_010262119.1	6.8e-149	533.9	zinc transporter
maker-VaccDscaff43-augustus-gene-180.15-mRNA-1	4432.XP_010254980.1	3.5e-221	774.2	DA1-related
augustus_masked-VaccDscaff43-processed-gene-190.9-mRNA-1	3641.EOY23100	1.9e-40	174.5	Plant mobile domain
maker-VaccDscaff43-snap-gene-194.44-mRNA-1	102107.XP_008238417.1	3.5e-91	341.3	Nudix hydrolase
augustus_masked-VaccDscaff43-processed-gene-194.11-mRNA-1	3641.EOY23100	4e-26	127.5	Plant mobile domain
augustus_masked-VaccDscaff43-processed-gene-197.2-mRNA-1	3760.EMJ25445	1.4e-15	91.7	Plant mobile domain
augustus_masked-VaccDscaff43-processed-gene-192.7-mRNA-1	3760.EMJ27390	1.2e-27	132.5	Plant mobile domain
augustus_masked-VaccDscaff43-processed-gene-199.3-mRNA-1	161934.XP_010677282.1	6.2e-158	564.7	Pentatricopeptide repeat-containing protein
maker-VaccDscaff43-augustus-gene-201.36-mRNA-1	3641.EOY24106	6.1e-208	730.3	Regulator of nonsense transcripts 1 homolog
augustus_masked-VaccDscaff43-processed-gene-227.2-mRNA-1	225117.XP_009372311.1	2e-182	645.6	Pre-mRNA-splicing factor ATP-dependent RNA helicase
augustus_masked-VaccDscaff43-processed-gene-228.14-mRNA-1	3641.EOY04076	2.8e-40	173.7	Plant mobile domain
maker-VaccDscaff43-snap-gene-234.39-mRNA-1	4155.Migut.J00929.1.p	8.4e-143	514.2	isoform X1
maker-VaccDscaff43-snap-gene-242.27-mRNA-1	3694.POPTR_0001s08880.1	1.6e-202	712.2	Cytochrome p450
augustus_masked-VaccDscaff43-processed-gene-248.3-mRNA-1	3649.evm.model.supercontig_28.53	6e-26	124.4	B3 domain-containing protein At2g33720-like
maker-VaccDscaff43-augustus-gene-247.26-mRNA-1	4006.Lus10008499	5e-86	324.3	Belongs to the glutathione peroxidase family
maker-VaccDscaff43-augustus-gene-265.26-mRNA-1	3760.EMJ12090	6.2e-137	495.0	transcription factor
maker-VaccDscaff366-augustus-gene-0.33-mRNA-1	4155.Migut.L01116.1.p	8.9e-156	556.6	Belongs to the cation transport ATPase (P-type)
maker-VaccDscaff834-snap-gene-0.10-mRNA-1	3988.XP_002521945.1	1.1e-167	596.7	Poly(RC)-binding protein
maker-VaccDscaff206-augustus-gene-0.21-mRNA-1	29730.Gorai.009G349200.1	4.5e-12	77.0	Integral membrane HRF1 family protein
maker-VaccDscaff196-augustus-gene-0.22-mRNA-1	29760.VIT_04s0044g01330.t01	2.6e-159	568.2	GDP-mannose transporter
snap_masked-VaccDscaff434-processed-gene-0.18-mRNA-1	4096.XP_009758779.1	5e-164	584.3	Belongs to the peptidase A1 family
maker-VaccDscaff151-snap-gene-2.57-mRNA-1	4155.Migut.M01528.1.p	9.8e-122	443.4
maker-VaccDscaff1348-snap-gene-0.11-mRNA-1	264402.Cagra.0114s0043.1.p	7.8e-17	93.2	Multiple C2 and transmembrane domain-containing protein
maker-VaccDscaff1348-snap-gene-0.10-mRNA-1	13333.ERN11655	2.9e-10	71.2	Multiple C2 and transmembrane domain-containing protein
maker-VaccDscaff59-snap-gene-5.29-mRNA-1	3694.POPTR_0002s18380.1	1.2e-158	566.2	inactive purple acid phosphatase
maker-VaccDscaff59-snap-gene-6.37-mRNA-1	3885.XP_007158284.1	5.3e-18	99.4	Encoded by
augustus_masked-VaccDscaff1509-processed-gene-0.1-mRNA-1	29760.VIT_15s0048g01400.t01	6.2e-173	614.4	receptor-like serine threonine-protein kinase
augustus_masked-VaccDscaff153-processed-gene-2.4-mRNA-1	3641.EOY25968	2.2e-128	466.1	UPF0481 protein At3g02645
maker-VaccDscaff21-snap-gene-14.39-mRNA-1	29760.VIT_11s0016g01160.t01	1.4e-42	179.9
maker-VaccDscaff21-augustus-gene-22.21-mRNA-1	29760.VIT_16s0039g02110.t01	3.3e-211	741.5	mitochondrion organization
augustus_masked-VaccDscaff21-processed-gene-26.11-mRNA-1	3760.EMJ27390	2.8e-38	167.9	Plant mobile domain
augustus_masked-VaccDscaff21-processed-gene-31.5-mRNA-1	4098.XP_009615605.1	2.6e-85	322.4
augustus_masked-VaccDscaff21-processed-gene-41.0-mRNA-1	3827.XP_004498409.1	6.2e-167	594.3	receptor-like protein kinase
augustus_masked-VaccDscaff21-processed-gene-65.5-mRNA-1	218851.Aquca_013_00214.1	2.7e-30	139.0	calcium-dependent lipid-binding (CaLB domain) family protein
maker-VaccDscaff21-snap-gene-65.59-mRNA-1	29760.VIT_15s0048g02000.t01	1.1e-263	916.0	homeobox-leucine zipper protein
maker-VaccDscaff21-snap-gene-79.33-mRNA-1	3641.EOY22974	0.0	2388.6	mRNA cleavage
maker-VaccDscaff21-augustus-gene-89.21-mRNA-1	3827.XP_004499846.1	1e-39	171.0	Belongs to the 'GDSL' lipolytic enzyme family
augustus_masked-VaccDscaff21-processed-gene-94.11-mRNA-1	2711.XP_006490233.1	7.2e-79	301.2	F-box protein At5g07610-like
maker-VaccDscaff21-snap-gene-95.46-mRNA-1	102107.XP_008244613.1	8e-49	201.8	ribonuclease H protein
maker-VaccDscaff21-snap-gene-97.29-mRNA-1	4432.XP_010243797.1	6.3e-196	691.4	RNA polymerase II transcription regulator recruiting activity
augustus_masked-VaccDscaff21-processed-gene-97.2-mRNA-1	4096.XP_009765938.1	4.9e-74	284.6	Transcription factor
snap_masked-VaccDscaff21-processed-gene-114.22-mRNA-1	3750.XP_008345679.1	4.6e-25	121.7	CCR4-associated factor 1 homolog
maker-VaccDscaff21-augustus-gene-116.29-mRNA-1	4155.Migut.F00618.1.p	4.2e-243	847.8	Sodium/hydrogen exchanger family
maker-VaccDscaff21-augustus-gene-121.19-mRNA-1	29760.VIT_13s0067g01350.t01	5e-59	234.6	transcription factor
maker-VaccDscaff21-augustus-gene-135.31-mRNA-1	3694.POPTR_0010s20310.1	2.4e-79	302.8
augustus_masked-VaccDscaff21-processed-gene-138.0-mRNA-1	3983.cassava4.1_012146m	4.1e-167	594.0	Serine threonine-protein phosphatase
snap_masked-VaccDscaff21-processed-gene-142.30-mRNA-1	4432.XP_010256814.1	1.4e-35	155.6	Tropinone reductase homolog
maker-VaccDscaff21-augustus-gene-143.20-mRNA-1	3760.EMJ27983	3.5e-33	148.7	protein FAR1-RELATED SEQUENCE
augustus_masked-VaccDscaff21-processed-gene-151.9-mRNA-1	3641.EOY04076	3.3e-22	113.6	Plant mobile domain
augustus_masked-VaccDscaff21-processed-gene-156.4-mRNA-1	4432.XP_010275010.1	7.7e-16	91.7
maker-VaccDscaff21-snap-gene-173.37-mRNA-1	218851.Aquca_027_00085.1	1.2e-131	477.6	E3 SUMO-protein ligase
maker-VaccDscaff21-snap-gene-182.36-mRNA-1	3641.EOY18722	3.4e-178	633.3	pumilio homolog
augustus_masked-VaccDscaff21-processed-gene-183.9-mRNA-1	3641.EOY23100	6.7e-33	149.8	Plant mobile domain
augustus_masked-VaccDscaff21-processed-gene-191.6-mRNA-1	3641.EOY23100	9.9e-24	119.4	Plant mobile domain
maker-VaccDscaff21-snap-gene-194.21-mRNA-1	29760.VIT_04s0043g00720.t01	1.6e-35	155.2	Pyruvate dehydrogenase E1 component subunit
augustus_masked-VaccDscaff21-processed-gene-216.10-mRNA-1	57918.XP_004301250.1	5e-11	74.7	Domain of unknown function (DUF4539)
maker-VaccDscaff21-snap-gene-235.23-mRNA-1	3659.XP_004140247.1	5.3e-45	188.3	LRR receptor-like serine threonine-protein kinase
maker-VaccDscaff21-augustus-gene-246.22-mRNA-1	29760.VIT_08s0007g04020.t01	1.2e-95	356.7	ahl1,atahl1
snap_masked-VaccDscaff21-processed-gene-251.11-mRNA-1	4098.XP_009590884.1	1.1e-53	216.5	DNA-binding domain in plant proteins
augustus_masked-VaccDscaff21-processed-gene-260.1-mRNA-1	4096.XP_009785411.1	5.9e-57	229.6	Plant protein of unknown function
snap_masked-VaccDscaff21-processed-gene-261.11-mRNA-1	3847.GLYMA13G22080.1	8.8e-27	126.7
maker-VaccDscaff21-snap-gene-269.53-mRNA-1	29760.VIT_08s0007g03000.t01	9.6e-111	406.8	chaperone protein
maker-VaccDscaff21-snap-gene-307.29-mRNA-1	3988.XP_002516653.1	1.1e-143	516.5	TRAFAC class TrmE-Era-EngA-EngB-Septin- like GTPase
maker-VaccDscaff21-snap-gene-321.57-mRNA-1	981085.XP_010112832.1	6.5e-89	334.7	Belongs to the short-chain dehydrogenases reductases (SDR)
maker-VaccDscaff21-snap-gene-339.36-mRNA-1	3983.cassava4.1_005480m	9.2e-244	849.4	The class-II pyridine nucleotide-disulfide oxidoreductase
maker-VaccDscaff21-snap-gene-339.34-mRNA-1	3641.EOY25302	5.8e-17	94.7	Domain of unknown function (DUF4220)
maker-VaccDscaff21-snap-gene-342.43-mRNA-1	29760.VIT_15s0046g00300.t01	0.0	1541.2	Exportin-2
maker-VaccDscaff21-snap-gene-347.27-mRNA-1	4113.PGSC0003DMT400093822	1.9e-27	129.8	No apical meristem (NAM) protein
snap_masked-VaccDscaff21-processed-gene-350.19-mRNA-1	4155.Migut.N02323.1.p	9.9e-15	86.7	EF-hand domain
maker-VaccDscaff21-augustus-gene-366.36-mRNA-1	29760.VIT_13s0067g03700.t01	3.8e-214	751.1	synthase
augustus_masked-VaccDscaff21-processed-gene-366.8-mRNA-1	29760.VIT_13s0067g03700.t01	8.5e-200	703.4	synthase
snap_masked-VaccDscaff21-processed-gene-373.26-mRNA-1	3694.POPTR_0013s05560.1	8.3e-111	406.8	Short-chain type dehydrogenase
augustus_masked-VaccDscaff21-processed-gene-378.1-mRNA-1	981085.XP_010092414.1	3.4e-41	174.9	RNA-directed DNA methylation 1
augustus_masked-VaccDscaff21-processed-gene-378.4-mRNA-1	102107.XP_008224276.1	7.5e-26	124.4	RNA-directed DNA methylation 1
maker-VaccDscaff287-snap-gene-0.51-mRNA-1	29760.VIT_14s0006g02620.t01	3.4e-152	544.7	Alpha beta hydrolase domain-containing protein
maker-VaccDscaff187-augustus-gene-0.22-mRNA-1	29760.VIT_11s0016g02870.t01	2e-199	701.8	Belongs to the peptidase M16 family
maker-VaccDscaff27-augustus-gene-15.40-mRNA-1	2711.XP_006481087.1	0.0	1470.7	ETO1-like protein 1
snap_masked-VaccDscaff27-processed-gene-20.19-mRNA-1	29760.VIT_08s0105g00330.t01	0.0	1574.3	isoform X1
augustus_masked-VaccDscaff27-processed-gene-29.4-mRNA-1	4006.Lus10039780	5.3e-52	212.2	UPF0481 protein At3g47200-like
maker-VaccDscaff27-augustus-gene-34.31-mRNA-1	2711.XP_006480801.1	2.2e-66	258.8	At3g17950-like
snap_masked-VaccDscaff27-processed-gene-37.32-mRNA-1	3847.GLYMA12G07010.2	7e-21	108.6	THO complex subunit
maker-VaccDscaff27-augustus-gene-53.29-mRNA-1	3885.XP_007134597.1	5.1e-46	192.2	Late embryogenesis abundant protein
maker-VaccDscaff27-snap-gene-58.22-mRNA-1	29760.VIT_13s0073g00610.t01	2.8e-255	888.3	Belongs to the peptidase C19 family
maker-VaccDscaff27-snap-gene-69.42-mRNA-1	225117.XP_009333811.1	4.6e-18	97.8	TMV resistance protein N-like
maker-VaccDscaff27-snap-gene-80.21-mRNA-1	4113.PGSC0003DMT400080650	2.8e-79	301.6	Polyadenylate-binding protein 2-like
maker-VaccDscaff27-augustus-gene-93.21-mRNA-1	29730.Gorai.009G113900.1	1.6e-177	629.4	Belongs to the cytochrome P450 family
augustus_masked-VaccDscaff27-processed-gene-110.2-mRNA-1	3641.EOY23100	4.4e-09	70.5	Plant mobile domain
maker-VaccDscaff27-augustus-gene-111.38-mRNA-1	4006.Lus10039780	2.1e-58	233.8	UPF0481 protein At3g47200-like
maker-VaccDscaff27-augustus-gene-125.48-mRNA-1	102107.XP_008218841.1	1.2e-85	322.8	Golgi membrane protein involved in vesicular trafficking
maker-VaccDscaff27-augustus-gene-130.16-mRNA-1	29760.VIT_14s0060g01160.t01	0.0	1395.6	isoform X1
augustus_masked-VaccDscaff27-processed-gene-146.0-mRNA-1	29730.Gorai.007G299100.1	2.2e-18	97.8
augustus_masked-VaccDscaff27-processed-gene-155.12-mRNA-1	3641.EOY23100	4e-19	102.8	Plant mobile domain
augustus_masked-VaccDscaff27-processed-gene-155.11-mRNA-1	3641.EOY23100	2.9e-18	99.0	Plant mobile domain
augustus_masked-VaccDscaff27-processed-gene-158.5-mRNA-1	3760.EMJ05680	5.6e-09	67.8	GRF zinc finger
maker-VaccDscaff27-augustus-gene-165.48-mRNA-1	29760.VIT_05s0020g01780.t01	1.3e-25	123.2	chromatin-remodeling complex ATPase
augustus_masked-VaccDscaff27-processed-gene-170.0-mRNA-1	3880.AES73846	2.3e-18	98.2	Protein of unknown function (DUF632)
maker-VaccDscaff27-snap-gene-176.32-mRNA-1	218851.Aquca_035_00073.1	6.2e-206	724.2	phosphatidylinositol dephosphorylation
augustus_masked-VaccDscaff27-processed-gene-182.0-mRNA-1	3641.EOY23100	2.4e-16	94.7	Plant mobile domain
snap_masked-VaccDscaff27-processed-gene-183.12-mRNA-1	225117.XP_009362951.1	0.0	1211.4	Pentatricopeptide repeat-containing protein
maker-VaccDscaff27-snap-gene-188.28-mRNA-1	3847.GLYMA05G08921.1	3.9e-16	93.6	Domain of unknown function (DUF4283)
augustus_masked-VaccDscaff27-processed-gene-199.6-mRNA-1	4096.XP_009763048.1	5.1e-167	594.3	Belongs to the peptidase A1 family
maker-VaccDscaff27-augustus-gene-203.28-mRNA-1	4432.XP_010266778.1	3.4e-46	191.8
maker-VaccDscaff27-augustus-gene-208.18-mRNA-1	4098.XP_009625187.1	7.5e-57	226.9	LOB domain-containing protein
maker-VaccDscaff27-augustus-gene-211.20-mRNA-1	29730.Gorai.007G201200.1	0.0	1112.1	UPF0261 protein
maker-VaccDscaff27-snap-gene-230.27-mRNA-1	29760.VIT_03s0063g01970.t01	5.1e-82	310.8	Belongs to the globin family
maker-VaccDscaff27-augustus-gene-232.30-mRNA-1	3983.cassava4.1_003101m	2.1e-237	828.6	beta-1,3-galactosyltransferase 19
maker-VaccDscaff27-snap-gene-235.39-mRNA-1	3641.EOY21710	3.2e-74	285.0	integral membrane HPP family protein
maker-VaccDscaff27-snap-gene-239.37-mRNA-1	4098.XP_009598550.1	8.6e-73	281.6
maker-VaccDscaff27-snap-gene-240.36-mRNA-1	29760.VIT_14s0066g00250.t01	8.1e-60	237.7	Belongs to the 'GDSL' lipolytic enzyme family
maker-VaccDscaff27-augustus-gene-242.27-mRNA-1	3641.EOY20614	3.2e-192	678.3	calmodulin binding protein
augustus_masked-VaccDscaff27-processed-gene-247.8-mRNA-1	3880.AES98175	2.4e-17	96.3	Domain of unknown function (DUF4283)
maker-VaccDscaff27-augustus-gene-262.19-mRNA-1	225117.XP_009354047.1	3.1e-27	129.4	f-box protein
snap_masked-VaccDscaff27-processed-gene-264.23-mRNA-1	3988.XP_002519689.1	8.6e-17	94.0	Belongs to the universal ribosomal protein uS11 family
maker-VaccDscaff27-augustus-gene-275.31-mRNA-1	4081.Solyc06g072620.2.1	3.4e-83	315.1	Mediates both low-affinity uptake and efflux of sugar
maker-VaccDscaff27-snap-gene-277.33-mRNA-1	4098.XP_009618909.1	0.0	2227.6
maker-VaccDscaff27-augustus-gene-279.25-mRNA-1	2711.XP_006485105.1	1.1e-152	547.0	Transcription factor
maker-VaccDscaff27-augustus-gene-279.29-mRNA-1	29760.VIT_17s0000g00320.t01	0.0	1099.0	Auxin response factors (ARFs) are transcriptional factors
augustus_masked-VaccDscaff27-processed-gene-288.8-mRNA-1	29760.VIT_09s0018g01330.t01	5.9e-59	234.6	fasciclin-like arabinogalactan protein
maker-VaccDscaff27-augustus-gene-293.24-mRNA-1	71139.XP_010034028.1	2.3e-15	89.4	Metal transporter
augustus_masked-VaccDscaff27-processed-gene-295.5-mRNA-1	4432.XP_010244792.1	2e-77	297.0	F-box LRR-repeat protein
augustus_masked-VaccDscaff27-processed-gene-296.1-mRNA-1	3641.EOX95893	3.8e-28	132.1	Mechanosensitive ion channel protein 1
maker-VaccDscaff27-augustus-gene-304.51-mRNA-1	3988.XP_002517625.1	0.0	1496.1	Hydrolyzes glycerol-phospholipids
maker-VaccDscaff27-augustus-gene-320.31-mRNA-1	4641.GSMUA_Achr4P10470_001	8.7e-56	223.4	SAWADEE domain
augustus_masked-VaccDscaff27-processed-gene-320.2-mRNA-1	29760.VIT_09s0002g03710.t01	1.9e-71	275.4	Protein of unknown function (DUF1677)
maker-VaccDscaff27-snap-gene-325.45-mRNA-1	29760.VIT_09s0054g00450.t01	1.2e-195	689.9	KH domain-containing protein
maker-VaccDscaff27-snap-gene-330.38-mRNA-1	29730.Gorai.011G054900.1	3.1e-92	345.5	Belongs to the ubiquitin-conjugating enzyme family
maker-VaccDscaff27-augustus-gene-341.27-mRNA-1	4113.PGSC0003DMT400076066	9.4e-22	109.4	Mitogen-activated protein kinase kinase kinase
maker-VaccDscaff27-augustus-gene-346.39-mRNA-1	4113.PGSC0003DMT400006608	1.7e-186	659.1	Sigma factor PP2C-like phosphatases
maker-VaccDscaff27-augustus-gene-348.13-mRNA-1	29760.VIT_09s0002g01670.t01	2.2e-81	309.3	RNA polymerase II transcription regulator recruiting activity
maker-VaccDscaff27-augustus-gene-351.23-mRNA-1	29760.VIT_17s0000g09700.t01	1.8e-279	968.4	Protein SIEVE ELEMENT OCCLUSION
maker-VaccDscaff188-snap-gene-1.72-mRNA-1	2711.XP_006487783.1	7.3e-54	218.8	ankyrin repeat
augustus_masked-VaccDscaff20-processed-gene-1.6-mRNA-1	3694.POPTR_0019s07610.1	2.3e-49	202.6	Four repeated domains in the Fasciclin I family of proteins
maker-VaccDscaff20-snap-gene-1.47-mRNA-1	4155.Migut.F00086.1.p	4.6e-30	137.5	Acetyltransferase (GNAT) family
augustus_masked-VaccDscaff20-processed-gene-4.3-mRNA-1	4432.XP_010248153.1	7.5e-31	140.6	serine protease inhibitor, Kazal-type family protein
maker-VaccDscaff20-augustus-gene-8.41-mRNA-1	29760.VIT_16s0098g01280.t01	1.8e-93	349.0	Rhodanese-like domain-containing protein 14
maker-VaccDscaff20-augustus-gene-12.26-mRNA-1	3983.cassava4.1_011419m	2.4e-72	279.3	Transcription factor
maker-VaccDscaff20-augustus-gene-28.42-mRNA-1	3988.XP_002511906.1	2.1e-109	402.1	Belongs to the protein kinase superfamily
augustus_masked-VaccDscaff20-processed-gene-28.7-mRNA-1	3760.EMJ21182	2.3e-66	259.6	F-box protein At5g49610-like
augustus_masked-VaccDscaff20-processed-gene-28.10-mRNA-1	3760.EMJ21182	2.3e-66	259.6	F-box protein At5g49610-like
snap_masked-VaccDscaff20-processed-gene-28.32-mRNA-1	3760.EMJ21182	3.9e-26	125.2	F-box protein At5g49610-like
maker-VaccDscaff20-augustus-gene-32.26-mRNA-1	29760.VIT_13s0067g03220.t01	3e-82	313.9	Probable zinc-ribbon domain
augustus_masked-VaccDscaff20-processed-gene-43.4-mRNA-1	161934.XP_010676554.1	1e-31	144.4	Myb/SANT-like DNA-binding domain
maker-VaccDscaff20-snap-gene-46.64-mRNA-1	4536.ONIVA07G13240.1	3.7e-200	705.7	Belongs to the UDP-glycosyltransferase family
augustus_masked-VaccDscaff20-processed-gene-46.14-mRNA-1	3983.cassava4.1_017974m	4.1e-73	280.8	Belongs to the small heat shock protein (HSP20) family
augustus_masked-VaccDscaff20-processed-gene-47.13-mRNA-1	3641.EOY04076	3.8e-32	147.5	Plant mobile domain
maker-VaccDscaff20-augustus-gene-49.31-mRNA-1	29760.VIT_13s0019g02000.t01	1e-248	866.7	pumilio homolog
augustus_masked-VaccDscaff20-processed-gene-50.7-mRNA-1	3641.EOY18034	2e-56	226.9	XH domain
augustus_masked-VaccDscaff20-processed-gene-53.1-mRNA-1	29760.VIT_13s0019g00710.t01	4e-64	251.9	enoyl-CoA hydratase isomerase family protein
maker-VaccDscaff20-augustus-gene-53.39-mRNA-1	29760.VIT_13s0019g02000.t01	1.1e-245	856.7	pumilio homolog
augustus_masked-VaccDscaff20-processed-gene-57.8-mRNA-1	3656.XP_008457542.1	1.1e-68	265.8	Belongs to the universal ribosomal protein uS8 family
augustus_masked-VaccDscaff20-processed-gene-57.0-mRNA-1	102107.XP_008223213.1	7.5e-49	199.5	protein heterodimerization activity
augustus_masked-VaccDscaff20-processed-gene-57.2-mRNA-1	29760.VIT_13s0019g00710.t01	5.5e-74	284.3	enoyl-CoA hydratase isomerase family protein
maker-VaccDscaff20-snap-gene-64.43-mRNA-1	29760.VIT_13s0019g04010.t01	0.0	1429.8	SWI3, ADA2, N-CoR and TFIIIB'' DNA-binding domains
augustus_masked-VaccDscaff20-processed-gene-65.7-mRNA-1	3760.EMJ27390	1.5e-39	171.4	Plant mobile domain
maker-VaccDscaff20-augustus-gene-66.36-mRNA-1	29760.VIT_13s0019g04200.t01	4.6e-207	727.2	lipolytic acyl hydrolase (LAH)
snap_masked-VaccDscaff20-processed-gene-66.25-mRNA-1	4432.XP_010253670.1	2.6e-18	99.4	Caffeoylshikimate esterase-like
maker-VaccDscaff20-augustus-gene-76.20-mRNA-1	3641.EOY19004	7e-149	534.3	ATP-dependent RNA helicase
augustus_masked-VaccDscaff20-processed-gene-81.9-mRNA-1	3983.cassava4.1_011425m	1.7e-88	332.8	Coiled-coil domain-containing protein 94 homolog
snap_masked-VaccDscaff20-processed-gene-82.22-mRNA-1	4432.XP_010247827.1	5.9e-237	827.4	expressed protein
maker-VaccDscaff20-augustus-gene-90.27-mRNA-1	29760.VIT_00s0261g00010.t01	3e-80	304.7
maker-VaccDscaff20-augustus-gene-97.28-mRNA-1	4113.PGSC0003DMT400072899	9.4e-128	463.0	Glucosamine-6-phosphate isomerases
maker-VaccDscaff20-augustus-gene-105.12-mRNA-1	3983.cassava4.1_021762m	1.4e-127	463.8	WPP domain-interacting tail-anchored protein
augustus_masked-VaccDscaff20-processed-gene-117.3-mRNA-1	3760.EMJ23911	3.2e-45	188.3	Clavaminate synthase-like protein
maker-VaccDscaff20-augustus-gene-148.19-mRNA-1	4432.XP_010275353.1	0.0	1518.8	involved in the RNA silencing pathway
maker-VaccDscaff20-snap-gene-173.20-mRNA-1	3880.AES83754	3.2e-18	97.4	Belongs to the DEFL family
maker-VaccDscaff20-snap-gene-176.42-mRNA-1	3694.POPTR_0010s17740.1	3e-258	897.9	C2 domain
maker-VaccDscaff20-snap-gene-185.40-mRNA-1	981085.XP_010092932.1	3.2e-40	171.4	Aldo/keto reductase family
snap_masked-VaccDscaff20-processed-gene-185.17-mRNA-1	225117.XP_009352370.1	1.6e-10	73.6	Plant mobile domain
snap_masked-VaccDscaff20-processed-gene-201.21-mRNA-1	4432.XP_010266177.1	5.4e-10	70.9	transposition, RNA-mediated
maker-VaccDscaff20-augustus-gene-218.25-mRNA-1	3760.EMJ04655	9.7e-87	327.8	Pentatricopeptide repeat-containing protein At2g20710
maker-VaccDscaff20-augustus-gene-220.17-mRNA-1	29760.VIT_10s0003g05030.t01	5.3e-291	1007.3	LRR receptor-like serine threonine-protein kinase
augustus_masked-VaccDscaff20-processed-gene-220.1-mRNA-1	102107.XP_008225602.1	0.0	1194.5	receptor-like protein kinase
maker-VaccDscaff20-augustus-gene-234.17-mRNA-1	3760.EMJ13018	2.7e-195	688.3	Glycosyl transferase family 2
maker-VaccDscaff20-snap-gene-241.28-mRNA-1	29760.VIT_04s0008g00210.t01	1.6e-54	218.8	phosphotransfer protein
maker-VaccDscaff20-snap-gene-251.41-mRNA-1	3760.EMJ24045	6.6e-157	560.5	Branched-chain-amino-acid aminotransferase-like protein 3
maker-VaccDscaff20-snap-gene-263.33-mRNA-1	102107.XP_008239097.1	3.6e-127	462.6	MuDR family transposase
maker-VaccDscaff20-snap-gene-269.25-mRNA-1	4432.XP_010249911.1	3.8e-43	181.8	Coiled-coil domain-containing protein
augustus_masked-VaccDscaff20-processed-gene-277.3-mRNA-1	29760.VIT_04s0008g02450.t01	2.4e-147	528.9
maker-VaccDscaff20-snap-gene-291.23-mRNA-1	29760.VIT_04s0008g06490.t01	1.4e-63	249.2	ER membrane protein complex subunit 7 homolog
maker-VaccDscaff20-augustus-gene-297.22-mRNA-1	3649.evm.model.supercontig_64.151	1.6e-25	121.7	udp-sugar
maker-VaccDscaff20-augustus-gene-307.21-mRNA-1	3988.XP_002529405.1	1.3e-18	100.9	U1-like zinc finger
maker-VaccDscaff20-snap-gene-308.40-mRNA-1	3641.EOY29346	9.1e-61	240.7	WRKY Transcription Factor
maker-VaccDscaff20-snap-gene-310.22-mRNA-1	3760.EMJ26351	1.6e-192	679.5	Transcription initiation factor TFIID subunit
maker-VaccDscaff20-augustus-gene-317.22-mRNA-1	225117.XP_009335427.1	7.6e-239	833.6	glycerophosphoryl diester phosphodiesterase
maker-VaccDscaff20-snap-gene-322.41-mRNA-1	4432.XP_010255421.1	2.5e-250	870.9	Tubulin is the major constituent of microtubules
maker-VaccDscaff20-augustus-gene-322.31-mRNA-1	3988.XP_002509785.1	2.1e-87	328.9	Glutathione S-transferase
maker-VaccDscaff20-augustus-gene-333.28-mRNA-1	29760.VIT_02s0025g00110.t01	0.0	1323.1	DNA repair helicase
maker-VaccDscaff20-snap-gene-338.31-mRNA-1	4432.XP_010251606.1	7e-56	224.9	Plant cell wall protein SlTFR88
augustus_masked-VaccDscaff20-processed-gene-338.4-mRNA-1	29760.VIT_02s0025g00530.t01	1.6e-29	136.3	Late embryogenesis abundant protein
maker-VaccDscaff20-augustus-gene-349.42-mRNA-1	225117.XP_009352370.1	2.2e-25	124.4	Plant mobile domain
maker-VaccDscaff20-augustus-gene-353.14-mRNA-1	29760.VIT_02s0025g01370.t01	5.9e-66	258.5
maker-VaccDscaff20-augustus-gene-370.24-mRNA-1	2711.XP_006471164.1	3.7e-233	814.3	Alpha-trehalose glucohydrolase
maker-VaccDscaff20-augustus-gene-370.19-mRNA-1	3983.cassava4.1_000922m	3.5e-12	78.6	RWP-RK domain
maker-VaccDscaff20-augustus-gene-376.22-mRNA-1	4432.XP_010258887.1	3.7e-69	267.7
maker-VaccDscaff334-snap-gene-0.30-mRNA-1	29760.VIT_01s0010g03530.t01	2.4e-115	421.8	ELMO domain-containing protein
maker-VaccDscaff12-snap-gene-18.52-mRNA-1	29760.VIT_18s0122g00380.t01	1.6e-188	666.0	Squamosa promoter-binding-like protein
maker-VaccDscaff12-augustus-gene-21.27-mRNA-1	29760.VIT_19s0093g00500.t01	3.6e-49	202.6	LRR-repeat protein
maker-VaccDscaff12-snap-gene-22.25-mRNA-1	981085.XP_010109992.1	4.4e-101	374.8	Endoplasmin homolog
maker-VaccDscaff12-augustus-gene-25.27-mRNA-1	3694.POPTR_0002s02520.1	8.8e-38	163.3	Protein disulfide-isomerase LQY1
maker-VaccDscaff12-snap-gene-28.41-mRNA-1	29760.VIT_18s0122g00380.t01	6.2e-172	610.9	Squamosa promoter-binding-like protein
maker-VaccDscaff12-snap-gene-51.47-mRNA-1	981085.XP_010109992.1	2.4e-100	372.5	Endoplasmin homolog
maker-VaccDscaff12-augustus-gene-54.36-mRNA-1	3694.POPTR_0002s02520.1	8.8e-38	163.3	Protein disulfide-isomerase LQY1
augustus_masked-VaccDscaff12-processed-gene-59.5-mRNA-1	4081.Solyc04g081050.1.1	0.0	1078.9	TPR repeat-containing protein At1g05150-like
maker-VaccDscaff12-augustus-gene-59.44-mRNA-1	4432.XP_010263867.1	3.4e-157	561.2	SH3 domain-containing protein
snap_masked-VaccDscaff12-processed-gene-67.31-mRNA-1	3760.EMJ15417	2.8e-28	132.5	Protein FAR1-RELATED SEQUENCE
augustus_masked-VaccDscaff12-processed-gene-83.4-mRNA-1	29760.VIT_18s0001g11560.t01	1.1e-196	693.0	cytochrome P450
maker-VaccDscaff12-augustus-gene-94.19-mRNA-1	3750.XP_008367666.1	6.1e-36	157.9	Protein DCL, chloroplastic-like
maker-VaccDscaff12-augustus-gene-108.20-mRNA-1	4096.XP_009760309.1	3.8e-225	787.7	Natural resistance-associated macrophage protein
augustus_masked-VaccDscaff12-processed-gene-131.3-mRNA-1	3641.EOY04076	7e-37	163.7	Plant mobile domain
maker-VaccDscaff12-snap-gene-146.43-mRNA-1	4098.XP_009609319.1	2.7e-164	585.9	Protein of unknown function (DUF563)
maker-VaccDscaff12-augustus-gene-151.28-mRNA-1	4155.Migut.C01161.1.p	3.7e-10	72.0
maker-VaccDscaff12-snap-gene-159.28-mRNA-1	4432.XP_010276278.1	8.3e-64	251.5	ribosomal RNA-processing protein
maker-VaccDscaff12-augustus-gene-167.32-mRNA-1	4155.Migut.F00618.1.p	1.4e-243	849.4	Sodium/hydrogen exchanger family
maker-VaccDscaff12-augustus-gene-168.22-mRNA-1	4155.Migut.F00618.1.p	1e-201	710.3	Sodium/hydrogen exchanger family
maker-VaccDscaff12-snap-gene-178.38-mRNA-1	4096.XP_009775540.1	8.9e-07	60.5	RING-like zinc finger
augustus_masked-VaccDscaff12-processed-gene-188.3-mRNA-1	3760.EMJ27390	7.3e-12	79.0	Plant mobile domain
maker-VaccDscaff12-augustus-gene-232.20-mRNA-1	981085.XP_010103942.1	2.2e-30	138.7	signal peptidase complex subunit 1
maker-VaccDscaff12-snap-gene-241.19-mRNA-1	3983.cassava4.1_009039m	3.6e-219	767.3	Catalytic subunit of the queuine tRNA-ribosyltransferase
snap_masked-VaccDscaff12-processed-gene-259.16-mRNA-1	3694.POPTR_0014s05210.1	7.1e-08	63.5	Belongs to the ALG6 ALG8 glucosyltransferase family
augustus_masked-VaccDscaff12-processed-gene-266.10-mRNA-1	3641.EOY23100	1.8e-22	115.2	Plant mobile domain
maker-VaccDscaff12-snap-gene-292.31-mRNA-1	29760.VIT_15s0046g01790.t01	3.9e-155	555.1	AT-rich interactive domain-containing protein
maker-VaccDscaff12-snap-gene-309.24-mRNA-1	3641.EOY31987	1.6e-293	1015.8	cadmium zinc-transporting ATPase
maker-VaccDscaff12-augustus-gene-316.26-mRNA-1	4432.XP_010256356.1	1.1e-260	906.4	U4 U6.U5 tri-snRNP-associated protein
maker-VaccDscaff12-snap-gene-317.32-mRNA-1	225117.XP_009339413.1	1.3e-55	222.6	phospholipase
maker-VaccDscaff12-augustus-gene-339.30-mRNA-1	29760.VIT_11s0016g04600.t01	1.1e-136	493.4	transcription factor
augustus_masked-VaccDscaff12-processed-gene-342.2-mRNA-1	29760.VIT_11s0016g04760.t01	2.1e-29	135.2
snap_masked-VaccDscaff12-processed-gene-343.17-mRNA-1	29760.VIT_11s0016g04810.t01	3.1e-242	844.3	Belongs to the cytochrome P450 family
augustus_masked-VaccDscaff12-processed-gene-343.2-mRNA-1	29760.VIT_11s0016g04760.t01	1.3e-28	132.5
maker-VaccDscaff12-snap-gene-345.54-mRNA-1	29730.Gorai.009G130500.1	4.1e-08	65.5	at1g15400
maker-VaccDscaff12-augustus-gene-347.40-mRNA-1	3656.XP_008457690.1	1.1e-62	245.7	NHP2-like protein 1
maker-VaccDscaff12-snap-gene-378.20-mRNA-1	29760.VIT_04s0044g00130.t01	0.0	1191.4	Transducin WD40 repeat-like superfamily protein
snap_masked-VaccDscaff12-processed-gene-384.17-mRNA-1	4155.Migut.L00740.1.p	1.2e-34	153.3	Sodium/hydrogen exchanger family
augustus_masked-VaccDscaff118-processed-gene-1.9-mRNA-1	29760.VIT_07s0104g01220.t01	1.2e-43	183.0
maker-VaccDscaff308-augustus-gene-0.23-mRNA-1	225117.XP_009376558.1	2.1e-268	932.2	tetratricopeptide repeat protein
maker-VaccDscaff54-augustus-gene-9.29-mRNA-1	2711.XP_006490787.1	8.2e-169	599.7	Converts alpha-aldose to the beta-anomer
augustus_masked-VaccDscaff54-processed-gene-11.3-mRNA-1	3760.EMJ27390	7.9e-08	66.2	Plant mobile domain
augustus_masked-VaccDscaff54-processed-gene-11.2-mRNA-1	3641.EOY23100	2.7e-18	99.4	Plant mobile domain
maker-VaccDscaff503-augustus-gene-0.14-mRNA-1	29760.VIT_19s0014g01310.t01	5.4e-139	500.7	Rab3 gtpase-activating protein non-catalytic
augustus_masked-VaccDscaff157-processed-gene-2.8-mRNA-1	3641.EOY23100	6.9e-26	125.9	Plant mobile domain
maker-VaccDscaff461-augustus-gene-0.21-mRNA-1	29760.VIT_15s0046g02280.t01	1.3e-83	315.8	Belongs to the ubiquitin-conjugating enzyme family
maker-VaccDscaff245-augustus-gene-0.62-mRNA-1	29760.VIT_19s0014g04220.t01	1.2e-87	330.1	G-type lectin S-receptor-like serine threonine-protein kinase
maker-VaccDscaff25-augustus-gene-9.34-mRNA-1	29760.VIT_04s0008g00910.t01	1.7e-139	502.7	histone deacetylase
maker-VaccDscaff25-snap-gene-12.41-mRNA-1	71139.XP_010023966.1	3e-79	301.2	PITH domain-containing protein
maker-VaccDscaff25-snap-gene-13.29-mRNA-1	3694.POPTR_0018s03410.1	1.4e-165	590.1	Belongs to the UDP-glycosyltransferase family
maker-VaccDscaff25-augustus-gene-16.19-mRNA-1	3983.cassava4.1_000829m	9.8e-157	561.2	Belongs to the protein kinase superfamily
snap_masked-VaccDscaff25-processed-gene-16.12-mRNA-1	4432.XP_010244792.1	6.2e-43	181.4	F-box LRR-repeat protein
augustus_masked-VaccDscaff25-processed-gene-17.8-mRNA-1	57918.XP_004295141.1	5.8e-111	408.3
maker-VaccDscaff25-augustus-gene-23.38-mRNA-1	4096.XP_009804609.1	8.4e-159	566.6	Belongs to the class I-like SAM-binding methyltransferase
augustus_masked-VaccDscaff25-processed-gene-38.6-mRNA-1	3641.EOY28503	5.1e-26	124.4	G-type lectin S-receptor-like serine threonine-protein kinase
augustus_masked-VaccDscaff25-processed-gene-45.6-mRNA-1	3847.GLYMA08G42390.3	5.5e-23	117.1	Serine threonine-protein phosphatase 7 long form homolog
maker-VaccDscaff25-snap-gene-50.38-mRNA-1	4432.XP_010269998.1	1.8e-81	309.3	Transcription factor that specifically binds AT-rich DNA
maker-VaccDscaff25-augustus-gene-52.24-mRNA-1	29760.VIT_02s0012g00550.t01	3.2e-182	644.8	phosphatidylinositol dephosphorylation
maker-VaccDscaff25-snap-gene-53.49-mRNA-1	4113.PGSC0003DMT400032651	8.8e-59	234.2	Transferase family
augustus_masked-VaccDscaff25-processed-gene-53.7-mRNA-1	3760.EMJ27390	1.9e-34	155.2	Plant mobile domain
augustus_masked-VaccDscaff25-processed-gene-54.6-mRNA-1	102107.XP_008229516.1	9.9e-50	203.4	Plant invertase/pectin methylesterase inhibitor
maker-VaccDscaff25-augustus-gene-61.22-mRNA-1	71139.XP_010023651.1	1.8e-262	911.4	Interconversion of serine and glycine
maker-VaccDscaff25-snap-gene-68.34-mRNA-1	3988.XP_002518085.1	6e-267	926.4	Purple acid phosphatase
maker-VaccDscaff25-augustus-gene-87.25-mRNA-1	4155.Migut.L00601.1.p	2.6e-53	214.9	Major latex
maker-VaccDscaff25-augustus-gene-92.29-mRNA-1	3885.XP_007140310.1	1.8e-06	61.2	Encoded by
maker-VaccDscaff25-augustus-gene-114.35-mRNA-1	4432.XP_010257606.1	1.9e-72	278.9	chromosome segregation
augustus_masked-VaccDscaff25-processed-gene-146.7-mRNA-1	3641.EOY04076	1.1e-21	112.5	Plant mobile domain
augustus_masked-VaccDscaff25-processed-gene-210.7-mRNA-1	3641.EOY23100	3.5e-18	100.1	Plant mobile domain
augustus_masked-VaccDscaff25-processed-gene-214.2-mRNA-1	4096.XP_009758779.1	1.9e-157	562.4	Belongs to the peptidase A1 family
maker-VaccDscaff25-augustus-gene-220.28-mRNA-1	29760.VIT_18s0001g03180.t01	2.7e-125	455.3	WAT1-related protein
snap_masked-VaccDscaff25-processed-gene-223.17-mRNA-1	4113.PGSC0003DMT400053597	1.8e-16	92.0	Zinc knuckle
snap_masked-VaccDscaff25-processed-gene-225.21-mRNA-1	4113.PGSC0003DMT400053597	1.8e-16	92.0	Zinc knuckle
augustus_masked-VaccDscaff25-processed-gene-242.4-mRNA-1	4155.Migut.E01700.1.p	5.7e-18	99.8	Domain of unknown function (DUF4216)
maker-VaccDscaff25-augustus-gene-249.23-mRNA-1	4096.XP_009768390.1	3.2e-129	468.4	Belongs to the 'GDSL' lipolytic enzyme family
snap_masked-VaccDscaff25-processed-gene-268.30-mRNA-1	29760.VIT_01s0127g00150.t01	1.1e-46	192.6	Involved in the biosynthesis of phylloquinone (vitamin K1)
augustus_masked-VaccDscaff25-processed-gene-270.5-mRNA-1	3694.POPTR_0010s05130.1	1.2e-17	96.3
maker-VaccDscaff25-snap-gene-279.29-mRNA-1	29760.VIT_01s0026g00930.t01	4.2e-158	564.3	Zinc finger MYND domain-containing protein
augustus_masked-VaccDscaff25-processed-gene-281.1-mRNA-1	102107.XP_008221687.1	1e-241	842.8	Pentatricopeptide repeat-containing protein
maker-VaccDscaff25-snap-gene-284.36-mRNA-1	102107.XP_008243779.1	3.2e-187	661.8	Cytochrome p450
maker-VaccDscaff25-augustus-gene-287.31-mRNA-1	85681.XP_006438799.1	3.2e-51	209.1	Remorin, C-terminal region
maker-VaccDscaff25-snap-gene-290.40-mRNA-1	225117.XP_009356554.1	3.2e-22	111.3	Protein of unknown function (DUF1262)
maker-VaccDscaff25-augustus-gene-291.25-mRNA-1	3712.Bo2g034310.1	1.6e-58	234.6	LRR-repeat protein
augustus_masked-VaccDscaff25-processed-gene-294.3-mRNA-1	29760.VIT_01s0011g03070.t01	1.7e-132	479.2	AP2 ERF and B3 domain-containing transcription
maker-VaccDscaff25-augustus-gene-295.23-mRNA-1	3988.XP_002529127.1	2.1e-85	323.2	Regulator of Vps4 activity in the MVB pathway
snap_masked-VaccDscaff25-processed-gene-297.26-mRNA-1	3983.cassava4.1_032950m	3.9e-08	64.3	CLAVATA3 ESR (CLE)-related protein
snap_masked-VaccDscaff25-processed-gene-302.24-mRNA-1	4096.XP_009774211.1	1.1e-201	709.1	fructose-bisphosphate aldolase
maker-VaccDscaff25-augustus-gene-303.27-mRNA-1	4098.XP_009615038.1	7.6e-141	506.9	Sec-independent protein translocase protein (TatC)
maker-VaccDscaff25-snap-gene-306.35-mRNA-1	3983.cassava4.1_001795m	2.4e-24	117.9	WD40 repeats
augustus_masked-VaccDscaff25-processed-gene-310.7-mRNA-1	29760.VIT_18s0072g00690.t01	3.9e-127	461.8	Myb/SANT-like DNA-binding domain
maker-VaccDscaff25-snap-gene-324.32-mRNA-1	4096.XP_009799456.1	1.3e-200	705.7	protein phosphatase 2C 5
maker-VaccDscaff25-snap-gene-326.42-mRNA-1	102107.XP_008235946.1	7.6e-70	270.4	Cytochrome p450
maker-VaccDscaff25-snap-gene-326.41-mRNA-1	981085.XP_010111721.1	1.4e-15	89.7	Cytochrome p450
maker-VaccDscaff25-snap-gene-331.46-mRNA-1	3641.EOY11723	1.1e-244	852.8	Catalyzes oxidative pentose-phosphate pathway
augustus_masked-VaccDscaff25-processed-gene-340.5-mRNA-1	4098.XP_009618312.1	1.1e-77	296.6	Agamous-like MADS-box protein AGL80
maker-VaccDscaff25-augustus-gene-341.24-mRNA-1	3641.EOY11788	3.5e-118	431.8	Protein NRT1 PTR FAMILY 4.5-like
maker-VaccDscaff25-snap-gene-343.38-mRNA-1	4113.PGSC0003DMT400087849	4.7e-97	361.7	germin-like protein 2-3
maker-VaccDscaff25-snap-gene-344.27-mRNA-1	29760.VIT_14s0060g00470.t01	0.0	2093.9	Belongs to the ABC transporter superfamily
maker-VaccDscaff25-augustus-gene-352.23-mRNA-1	3641.EOY25743	6.6e-277	959.9	Mitotic checkpoint family protein
maker-VaccDscaff25-snap-gene-354.36-mRNA-1	3641.EOX96990	2.7e-07	61.6	Belongs to the disease resistance NB-LRR family
maker-VaccDscaff467-augustus-gene-0.25-mRNA-1	2711.XP_006485820.1	1.4e-144	519.6	calmodulin binding protein
augustus_masked-VaccDscaff36-processed-gene-5.12-mRNA-1	3641.EOY27351	2.3e-26	124.8	Auxin responsive protein
maker-VaccDscaff36-augustus-gene-7.29-mRNA-1	3847.GLYMA13G38420.2	1.5e-58	232.3	RING-box protein
maker-VaccDscaff36-snap-gene-14.36-mRNA-1	57918.XP_004297544.1	2.2e-199	702.6	Histone-binding protein RBBP4 or subunit C of CAF1 complex
maker-VaccDscaff36-augustus-gene-14.31-mRNA-1	3827.XP_004510368.1	2e-64	252.3	Belongs to the cytochrome P450 family
maker-VaccDscaff36-snap-gene-29.51-mRNA-1	3983.cassava4.1_006224m	8.5e-244	849.4	Binds to the signal sequence of presecretory protein
maker-VaccDscaff36-augustus-gene-35.31-mRNA-1	4096.XP_009783854.1	1.2e-70	273.1
augustus_masked-VaccDscaff36-processed-gene-38.9-mRNA-1	4098.XP_009603305.1	6.2e-10	70.5
maker-VaccDscaff36-augustus-gene-48.39-mRNA-1	102107.XP_008239460.1	4.7e-45	188.0	Det1 complexing ubiquitin ligase
snap_masked-VaccDscaff36-processed-gene-61.15-mRNA-1	225117.XP_009352370.1	4.9e-27	130.2	Plant mobile domain
augustus_masked-VaccDscaff36-processed-gene-67.9-mRNA-1	3760.EMJ27390	1.1e-37	166.0	Plant mobile domain
maker-VaccDscaff36-augustus-gene-79.24-mRNA-1	57918.XP_004307949.1	4.6e-25	120.6	Belongs to the yippee family
maker-VaccDscaff36-snap-gene-87.28-mRNA-1	4096.XP_009800357.1	8.3e-49	199.5	MazG-like family
augustus_masked-VaccDscaff36-processed-gene-93.1-mRNA-1	3641.EOY22094	3.6e-85	322.0	transcription factor
maker-VaccDscaff36-snap-gene-96.35-mRNA-1	4537.OPUNC08G18510.1	1e-140	508.1	Sulfotransferase family
maker-VaccDscaff36-augustus-gene-110.22-mRNA-1	3750.XP_008374977.1	3.9e-57	228.4	Wall-associated receptor kinase C-terminal
maker-VaccDscaff36-snap-gene-112.31-mRNA-1	29760.VIT_17s0000g02970.t01	1e-212	746.1	Belongs to the multi antimicrobial extrusion (MATE) family
maker-VaccDscaff36-augustus-gene-115.20-mRNA-1	3656.XP_008465627.1	2e-28	132.5
augustus_masked-VaccDscaff36-processed-gene-124.6-mRNA-1	4096.XP_009786893.1	7.1e-139	500.4
maker-VaccDscaff36-augustus-gene-128.25-mRNA-1	102107.XP_008221679.1	3.7e-138	497.7	Hypersensitive-induced response protein
snap_masked-VaccDscaff36-processed-gene-131.9-mRNA-1	3694.POPTR_0016s06370.1	4.5e-71	275.4	Exocyst complex component EXO84A
maker-VaccDscaff36-snap-gene-133.32-mRNA-1	2711.XP_006483777.1	1.3e-190	672.5	IAA-amino acid hydrolase ILR1-like
maker-VaccDscaff36-augustus-gene-148.54-mRNA-1	29760.VIT_01s0127g00470.t01	1.1e-169	602.8	Belongs to the glycosyltransferase 8 family
maker-VaccDscaff36-augustus-gene-153.47-mRNA-1	29760.VIT_01s0127g00470.t01	1.9e-169	602.1	Belongs to the glycosyltransferase 8 family
maker-VaccDscaff36-snap-gene-159.21-mRNA-1	3983.cassava4.1_005156m	1.1e-181	642.9	Belongs to the multi antimicrobial extrusion (MATE)
augustus_masked-VaccDscaff36-processed-gene-182.3-mRNA-1	102107.XP_008242396.1	7e-86	324.3	UPF0481 protein
maker-VaccDscaff36-snap-gene-206.29-mRNA-1	57918.XP_004297042.1	3.8e-57	228.4
augustus_masked-VaccDscaff36-processed-gene-226.0-mRNA-1	4098.XP_009601422.1	1.8e-174	619.0	Belongs to the UDP-glycosyltransferase family
snap_masked-VaccDscaff36-processed-gene-229.29-mRNA-1	29760.VIT_00s2015g00020.t01	1.3e-09	68.9	F-box LRR-repeat protein
maker-VaccDscaff36-augustus-gene-230.31-mRNA-1	3641.EOY22866	1.4e-121	444.5	LRR receptor-like serine threonine-protein kinase
maker-VaccDscaff36-augustus-gene-231.23-mRNA-1	3641.EOY22866	1.1e-125	458.0	LRR receptor-like serine threonine-protein kinase
maker-VaccDscaff36-snap-gene-232.27-mRNA-1	3641.EOY22866	1e-88	334.7	LRR receptor-like serine threonine-protein kinase
maker-VaccDscaff36-snap-gene-240.36-mRNA-1	3760.EMJ23146	2.5e-101	376.7	RING-like zinc finger
maker-VaccDscaff36-augustus-gene-240.29-mRNA-1	3988.XP_002518131.1	1.9e-280	971.5	Ankyrin repeat domain-containing protein
maker-VaccDscaff36-snap-gene-255.39-mRNA-1	102107.XP_008224330.1	4.3e-20	104.8	MazG nucleotide pyrophosphohydrolase domain
snap_masked-VaccDscaff36-processed-gene-258.17-mRNA-1	3983.cassava4.1_003774m	5.4e-20	104.4	ankyrin repeat-containing protein
maker-VaccDscaff36-augustus-gene-262.16-mRNA-1	3694.POPTR_0010s02840.1	4.5e-55	221.1	Protein of unknown function (DUF679)
augustus_masked-VaccDscaff36-processed-gene-262.4-mRNA-1	3983.cassava4.1_028987m	3.2e-12	79.0	Protein of unknown function (DUF679)
maker-VaccDscaff36-snap-gene-262.22-mRNA-1	3694.POPTR_0010s02840.1	1e-47	196.4	Protein of unknown function (DUF679)
augustus_masked-VaccDscaff36-processed-gene-263.15-mRNA-1	4098.XP_009600560.1	2.8e-58	232.6	F-box associated domain
maker-VaccDscaff36-augustus-gene-296.34-mRNA-1	102107.XP_008224653.1	1.6e-106	392.1	Ras-related protein
maker-VaccDscaff36-augustus-gene-302.16-mRNA-1	3750.XP_008371367.1	1.6e-50	206.5	50S ribosomal protein L21
maker-VaccDscaff16-augustus-gene-2.26-mRNA-1	29760.VIT_14s0171g00260.t01	3.6e-113	414.5	Phosducin-like protein 3
augustus_masked-VaccDscaff16-processed-gene-9.4-mRNA-1	161934.XP_010676554.1	4.5e-24	117.9	Myb/SANT-like DNA-binding domain
maker-VaccDscaff16-augustus-gene-19.20-mRNA-1	4096.XP_009779081.1	0.0	1284.2	Raffinose synthase or seed imbibition protein Sip1
maker-VaccDscaff16-augustus-gene-27.23-mRNA-1	3847.GLYMA19G07600.1	2.1e-50	205.3	Ubiquitin homologues
maker-VaccDscaff16-snap-gene-30.33-mRNA-1	3641.EOY02388	1.3e-143	516.5	anatomical structure morphogenesis
maker-VaccDscaff16-augustus-gene-41.34-mRNA-1	2711.XP_006482489.1	2.1e-09	68.9	Gibberellin-regulated protein
maker-VaccDscaff16-augustus-gene-45.47-mRNA-1	4432.XP_010242166.1	2.4e-110	406.0	Belongs to the AAA ATPase family
maker-VaccDscaff16-snap-gene-52.40-mRNA-1	29760.VIT_14s0108g00020.t01	2.7e-62	245.4	May act as a component of the auxin efflux carrier
maker-VaccDscaff16-snap-gene-52.43-mRNA-1	3641.EOY03378	4.7e-20	103.6	May act as a component of the auxin efflux carrier
maker-VaccDscaff16-augustus-gene-54.31-mRNA-1	29760.VIT_14s0108g00130.t01	0.0	1088.6	Promotes mitochondrial protein synthesis
maker-VaccDscaff16-augustus-gene-70.28-mRNA-1	4155.Migut.J00852.1.p	2.2e-180	638.6	Belongs to the cytochrome P450 family
maker-VaccDscaff16-augustus-gene-74.38-mRNA-1	29760.VIT_14s0068g00450.t01	2.1e-191	675.2	Belongs to the UDP-glycosyltransferase family
augustus_masked-VaccDscaff16-processed-gene-75.6-mRNA-1	3760.EMJ00315	6e-38	166.0	Plant mobile domain
augustus_masked-VaccDscaff16-processed-gene-84.5-mRNA-1	9402.XP_006923691.1	2.8e-49	201.4	protein heterodimerization activity
augustus_masked-VaccDscaff16-processed-gene-84.11-mRNA-1	29730.Gorai.012G050800.1	8.5e-43	181.4	F-Box protein
augustus_masked-VaccDscaff16-processed-gene-85.7-mRNA-1	3641.EOY13354	8.6e-78	296.6	Belongs to the sulfotransferase 1 family
augustus_masked-VaccDscaff16-processed-gene-87.11-mRNA-1	4096.XP_009762226.1	9.6e-16	91.3	F-Box protein
maker-VaccDscaff16-snap-gene-90.33-mRNA-1	29730.Gorai.008G098100.1	2.7e-47	197.2	F-Box protein
maker-VaccDscaff16-augustus-gene-93.25-mRNA-1	3694.POPTR_0004s10500.1	0.0	1095.5	Endo-1,3(4)-beta-glucanase
maker-VaccDscaff16-augustus-gene-94.13-mRNA-1	3641.EOY04318	1.8e-121	442.6	Transmembrane protein 33 homolog
maker-VaccDscaff16-snap-gene-108.34-mRNA-1	4098.XP_009616550.1	2.5e-47	196.1	Mate efflux family protein
maker-VaccDscaff16-snap-gene-108.26-mRNA-1	3988.XP_002528064.1	9.7e-30	137.1	Belongs to the multi antimicrobial extrusion (MATE)
augustus_masked-VaccDscaff16-processed-gene-121.9-mRNA-1	4096.XP_009758682.1	7.3e-34	151.4	alpha/beta hydrolase fold
maker-VaccDscaff16-snap-gene-147.24-mRNA-1	4113.PGSC0003DMT400058520	1.5e-94	352.8	D-isomer specific 2-hydroxyacid dehydrogenase family
augustus_masked-VaccDscaff16-processed-gene-152.6-mRNA-1	102107.XP_008233477.1	8.6e-14	86.3	Plant mobile domain
augustus_masked-VaccDscaff16-processed-gene-153.3-mRNA-1	71139.XP_010061941.1	2.2e-156	558.9	xyloglucan galactosyltransferase
maker-VaccDscaff16-augustus-gene-190.21-mRNA-1	29760.VIT_04s0008g03880.t01	0.0	1371.7	intracellular protein transport
maker-VaccDscaff16-augustus-gene-193.23-mRNA-1	2711.XP_006483558.1	7.2e-78	297.0	ribosomal protein
augustus_masked-VaccDscaff16-processed-gene-193.4-mRNA-1	4006.Lus10030740	1e-34	154.5	Glycosyl transferase family 2
augustus_masked-VaccDscaff16-processed-gene-211.8-mRNA-1	161934.XP_010676554.1	2.4e-67	262.3	Myb/SANT-like DNA-binding domain
maker-VaccDscaff16-augustus-gene-211.30-mRNA-1	3641.EOY31445	9.2e-141	508.1	Tesmin/TSO1-like CXC domain
augustus_masked-VaccDscaff16-processed-gene-224.3-mRNA-1	3694.POPTR_0006s27550.1	9.9e-14	83.2
maker-VaccDscaff16-augustus-gene-233.26-mRNA-1	3641.EOY29228	0.0	1653.6	intracellular protein transport
maker-VaccDscaff16-snap-gene-234.34-mRNA-1	3641.EOY33125	3.9e-39	167.2	NADH dehydrogenase ubiquinone 1 alpha subcomplex subunit
maker-VaccDscaff16-augustus-gene-235.16-mRNA-1	2711.XP_006480137.1	6.4e-31	141.7	Armadillo repeat-containing protein
maker-VaccDscaff16-snap-gene-235.18-mRNA-1	85681.XP_006423067.1	1.5e-28	132.9	E3 ubiquitin-protein ligase RNF170-like
maker-VaccDscaff16-augustus-gene-236.18-mRNA-1	29760.VIT_04s0008g06880.t01	2.2e-88	331.6	ER membrane protein complex subunit
maker-VaccDscaff16-snap-gene-236.22-mRNA-1	2711.XP_006487783.1	1.1e-51	211.1	ankyrin repeat
maker-VaccDscaff16-augustus-gene-237.21-mRNA-1	71139.XP_010050791.1	1.4e-127	462.6	phosphatase 2C
maker-VaccDscaff16-augustus-gene-239.29-mRNA-1	4098.XP_009596286.1	9.4e-86	323.2	ribosomal protein L24, mitochondrial
maker-VaccDscaff16-augustus-gene-257.11-mRNA-1	90675.XP_010464000.1	7.4e-127	461.5
maker-VaccDscaff16-augustus-gene-277.25-mRNA-1	3847.GLYMA08G46900.1	5.3e-41	175.3	E3 ubiquitin-protein ligase
maker-VaccDscaff16-augustus-gene-311.26-mRNA-1	3641.EOY15947	1.5e-115	422.9	GDSL esterase lipase
maker-VaccDscaff16-augustus-gene-311.28-mRNA-1	3641.EOY15947	2.4e-129	468.8	GDSL esterase lipase
augustus_masked-VaccDscaff16-processed-gene-317.5-mRNA-1	3641.EOY04076	5.1e-40	173.7	Plant mobile domain
snap_masked-VaccDscaff16-processed-gene-332.13-mRNA-1	3760.EMJ26203	2.8e-74	285.8	Clathrin assembly protein
augustus_masked-VaccDscaff16-processed-gene-348.6-mRNA-1	2711.XP_006472361.1	1.4e-10	72.4	50S ribosomal protein 6
maker-VaccDscaff16-augustus-gene-356.23-mRNA-1	29760.VIT_18s0001g09270.t01	6.6e-22	110.2
maker-VaccDscaff16-augustus-gene-361.26-mRNA-1	4432.XP_010255087.1	3.8e-89	335.1	Thylakoidal processing peptidase
maker-VaccDscaff16-snap-gene-380.32-mRNA-1	4536.ONIVA09G20590.1	3.3e-232	812.0	In Between Ring fingers
maker-VaccDscaff16-augustus-gene-390.37-mRNA-1	3983.cassava4.1_029705m	4.5e-160	571.2	Involved in modulation of pathogen defense and leaf cell death
augustus_masked-VaccDscaff200-processed-gene-0.10-mRNA-1	3641.EOY17069	6.1e-43	180.6	Transcription factor
augustus_masked-VaccDscaff13-processed-gene-5.5-mRNA-1	29760.VIT_15s0021g02250.t01	7.9e-36	157.9	Agamous-like MADS-box protein
maker-VaccDscaff13-augustus-gene-6.23-mRNA-1	29730.Gorai.003G049600.1	1e-166	592.8	Cinnamyl alcohol dehydrogenase
maker-VaccDscaff13-augustus-gene-7.25-mRNA-1	3694.POPTR_0007s07020.1	3.2e-09	67.4
snap_masked-VaccDscaff13-processed-gene-9.14-mRNA-1	3983.cassava4.1_019906m	1.3e-17	96.3
maker-VaccDscaff13-snap-gene-30.60-mRNA-1	29760.VIT_04s0044g01990.t01	1.1e-159	570.1	L-type lectin-domain containing receptor kinase
maker-VaccDscaff13-augustus-gene-30.50-mRNA-1	4096.XP_009769576.1	1e-258	899.4	Legume lectin domain
maker-VaccDscaff13-augustus-gene-41.36-mRNA-1	981085.XP_010113349.1	1.7e-180	638.6	Belongs to the iron ascorbate-dependent oxidoreductase family
maker-VaccDscaff13-augustus-gene-42.41-mRNA-1	3694.POPTR_0005s11890.1	2.9e-78	298.1	Glyoxalase/Bleomycin resistance protein/Dioxygenase
snap_masked-VaccDscaff13-processed-gene-43.25-mRNA-1	3983.cassava4.1_010180m	1.4e-129	470.3	homoserine
augustus_masked-VaccDscaff13-processed-gene-46.2-mRNA-1	3641.EOY02992	9.3e-281	972.6	Potassium transporter
snap_masked-VaccDscaff13-processed-gene-46.30-mRNA-1	4572.TRIUR3_10637-P1	1.4e-28	133.3
maker-VaccDscaff13-augustus-gene-50.37-mRNA-1	102107.XP_008231065.1	6.3e-193	680.2	Belongs to the DHHC palmitoyltransferase family
maker-VaccDscaff13-augustus-gene-52.40-mRNA-1	4432.XP_010250698.1	2.6e-54	218.8	50S ribosomal protein L27
maker-VaccDscaff13-augustus-gene-56.43-mRNA-1	981085.XP_010111616.1	0.0	1960.7	TPLATE-like
snap_masked-VaccDscaff13-processed-gene-56.27-mRNA-1	3760.EMJ09702	6.4e-17	96.3	f-box protein
maker-VaccDscaff13-augustus-gene-60.34-mRNA-1	2711.XP_006470211.1	2.2e-68	265.8	surfeit locus protein
augustus_masked-VaccDscaff13-processed-gene-61.2-mRNA-1	29760.VIT_14s0066g00420.t01	3.8e-228	797.7	Pentatricopeptide repeat-containing protein
maker-VaccDscaff13-snap-gene-67.39-mRNA-1	102107.XP_008230581.1	3.7e-181	641.3	Polygalacturonase
maker-VaccDscaff13-augustus-gene-68.42-mRNA-1	3649.evm.model.supercontig_215.8	4.4e-167	594.3
maker-VaccDscaff13-snap-gene-84.32-mRNA-1	4432.XP_010259341.1	7.7e-85	321.2	TPX2 (targeting protein for Xklp2) protein family
augustus_masked-VaccDscaff13-processed-gene-84.11-mRNA-1	981085.XP_010089611.1	3.8e-84	318.9	SWI3, ADA2, N-CoR and TFIIIB'' DNA-binding domains
maker-VaccDscaff13-snap-gene-95.48-mRNA-1	29760.VIT_14s0083g00370.t01	2.8e-265	922.2	protein trichome birefringence-like 19
snap_masked-VaccDscaff13-processed-gene-100.10-mRNA-1	3694.POPTR_0004s09260.1	1.5e-08	67.0
augustus_masked-VaccDscaff13-processed-gene-101.0-mRNA-1	29760.VIT_14s0006g01840.t01	2.6e-226	792.7	Seven in absentia protein family
maker-VaccDscaff13-snap-gene-102.34-mRNA-1	3218.PP1S196_71V6.1	4.3e-21	107.8
maker-VaccDscaff13-augustus-gene-112.29-mRNA-1	29760.VIT_00s1328g00020.t01	1.8e-21	108.2	Phytosulfokines
maker-VaccDscaff13-snap-gene-119.30-mRNA-1	29760.VIT_07s0129g00530.t01	2.8e-135	488.0	Sigma factor sigB regulation protein rsbQ
maker-VaccDscaff13-augustus-gene-142.34-mRNA-1	3641.EOX91270	1.3e-25	123.6	B3 domain-containing
maker-VaccDscaff13-augustus-gene-153.27-mRNA-1	4432.XP_010270793.1	4.9e-136	490.7	ribosome production factor 2 homolog
maker-VaccDscaff13-augustus-gene-159.12-mRNA-1	3983.cassava4.1_006368m	3.4e-224	784.3	Cytochrome p450
maker-VaccDscaff13-augustus-gene-160.16-mRNA-1	29760.VIT_18s0001g03690.t01	5.2e-95	354.0
maker-VaccDscaff13-snap-gene-161.32-mRNA-1	29760.VIT_07s0095g00700.t01	3.1e-106	392.9	RNA recognition motif
augustus_masked-VaccDscaff13-processed-gene-172.11-mRNA-1	3760.EMJ02163	8.2e-13	79.7	Pentatricopeptide repeat-containing protein
maker-VaccDscaff13-augustus-gene-181.25-mRNA-1	4098.XP_009587296.1	3.9e-191	674.5	cyclic nucleotide-gated ion channel 20, chloroplastic
maker-VaccDscaff13-snap-gene-191.31-mRNA-1	3641.EOY23100	8.7e-33	148.3	Plant mobile domain
augustus_masked-VaccDscaff13-processed-gene-193.4-mRNA-1	2711.XP_006477777.1	3.3e-45	188.3	L-Ala-D L-amino acid
snap_masked-VaccDscaff13-processed-gene-194.23-mRNA-1	2711.XP_006485820.1	5.4e-156	557.8	calmodulin binding protein
maker-VaccDscaff13-snap-gene-198.34-mRNA-1	3641.EOY02188	2.1e-30	138.3	Isoprenylcysteine alpha-carbonyl methylesterase
augustus_masked-VaccDscaff13-processed-gene-198.11-mRNA-1	3641.EOY23100	3.2e-26	126.3	Plant mobile domain
maker-VaccDscaff13-snap-gene-218.23-mRNA-1	3988.XP_002511997.1	2.4e-75	289.7	Protein of unknown function, DUF617
maker-VaccDscaff13-augustus-gene-219.16-mRNA-1	3827.XP_004508602.1	4.8e-89	334.3	Protein CHAPERONE-LIKE PROTEIN OF POR1-like
maker-VaccDscaff13-snap-gene-219.23-mRNA-1	4096.XP_009762071.1	4.3e-229	800.4	Enolase, N-terminal domain
augustus_masked-VaccDscaff13-processed-gene-231.7-mRNA-1	225117.XP_009352370.1	9.6e-25	122.5	Plant mobile domain
maker-VaccDscaff13-snap-gene-234.20-mRNA-1	3656.XP_008450871.1	4.7e-31	142.1	TPL-binding domain in jasmonate signalling
maker-VaccDscaff13-augustus-gene-243.22-mRNA-1	3983.cassava4.1_002023m	4.2e-76	292.7	Plant protein of unknown function (DUF863)
maker-VaccDscaff13-snap-gene-250.30-mRNA-1	29760.VIT_04s0008g04520.t01	1.5e-89	335.9	transposition, RNA-mediated
maker-VaccDscaff13-augustus-gene-265.24-mRNA-1	2711.XP_006476643.1	1.4e-114	420.2	WRKY transcription factor
maker-VaccDscaff13-snap-gene-266.40-mRNA-1	3983.cassava4.1_004831m	3.6e-275	953.7	Dehydrogenase
maker-VaccDscaff13-augustus-gene-268.27-mRNA-1	981085.XP_010096202.1	1.2e-225	789.3	Belongs to the major facilitator superfamily
augustus_masked-VaccDscaff13-processed-gene-275.0-mRNA-1	102107.XP_008236924.1	5.5e-169	600.9	Belongs to the AAA ATPase family
maker-VaccDscaff13-augustus-gene-281.32-mRNA-1	3760.EMJ00689	2.7e-17	94.4
maker-VaccDscaff13-augustus-gene-282.24-mRNA-1	71139.XP_010066197.1	4e-164	584.3	Belongs to the peptidase C1 family
maker-VaccDscaff13-augustus-gene-283.26-mRNA-1	3649.evm.model.supercontig_150.43	5.6e-90	337.8	isoform X1
augustus_masked-VaccDscaff13-processed-gene-287.6-mRNA-1	3983.cassava4.1_017821m	2.7e-79	301.6	Catalyzes aldol cleavage of HMG into 2 molecules of pyruvate
maker-VaccDscaff13-augustus-gene-295.16-mRNA-1	4096.XP_009774271.1	6e-129	467.2	Belongs to the MIP aquaporin (TC 1.A.8) family
maker-VaccDscaff13-snap-gene-299.23-mRNA-1	4641.GSMUA_Achr9P26070_001	1.3e-189	669.8	Glutathione S-transferase
maker-VaccDscaff13-augustus-gene-302.21-mRNA-1	29760.VIT_03s0038g02310.t01	5.3e-96	357.5	RNA polymerase II transcription regulator recruiting activity
augustus_masked-VaccDscaff13-processed-gene-317.1-mRNA-1	4081.Solyc10g008580.1.1	2.6e-14	85.5	A Receptor for Ubiquitination Targets
snap_masked-VaccDscaff13-processed-gene-326.14-mRNA-1	218851.Aquca_007_00322.1	1.2e-09	70.1	Belongs to the peptidase C1 family
maker-VaccDscaff13-snap-gene-329.30-mRNA-1	29730.Gorai.009G103300.1	9.9e-11	72.0	Belongs to the TRAFAC class myosin-kinesin ATPase
maker-VaccDscaff13-snap-gene-352.33-mRNA-1	29760.VIT_02s0025g02070.t01	1.5e-14	88.6	Protein NLP7-like isoform X1
maker-VaccDscaff13-snap-gene-369.30-mRNA-1	29760.VIT_11s0016g01830.t01	1e-246	859.8	U-box domain-containing protein
maker-VaccDscaff1264-augustus-gene-0.4-mRNA-1	4096.XP_009801267.1	2.6e-164	585.9	PMR5 N terminal Domain
maker-VaccDscaff194-snap-gene-1.84-mRNA-1	3641.EOY18474	1.4e-158	567.0	Two-component response regulator-like
maker-VaccDscaff33-augustus-gene-5.21-mRNA-1	29760.VIT_08s0007g06770.t01	0.0	1291.6
augustus_masked-VaccDscaff33-processed-gene-6.0-mRNA-1	4098.XP_009587839.1	3.1e-39	168.3	RNA-directed DNA methylation 1
maker-VaccDscaff33-augustus-gene-8.33-mRNA-1	29760.VIT_08s0007g06690.t01	6.7e-13	82.0	WRC
maker-VaccDscaff33-snap-gene-11.42-mRNA-1	29760.VIT_13s0067g03700.t01	1.2e-212	746.1	synthase
maker-VaccDscaff33-augustus-gene-11.32-mRNA-1	29760.VIT_13s0067g03700.t01	5.2e-205	720.7	synthase
maker-VaccDscaff33-augustus-gene-13.20-mRNA-1	4155.Migut.K00040.1.p	1e-91	344.7	bromo domain
maker-VaccDscaff33-augustus-gene-14.21-mRNA-1	3760.EMJ22328	9.6e-73	280.0	DNA-directed RNA polymerases I, II, and III subunit
augustus_masked-VaccDscaff33-processed-gene-27.1-mRNA-1	4098.XP_009629774.1	1e-27	130.6	No apical meristem (NAM) protein
maker-VaccDscaff33-snap-gene-35.30-mRNA-1	3983.cassava4.1_005480m	1.6e-243	848.6	Belongs to class-II pyridine nucleotide-disulfide oxidoreductase
augustus_masked-VaccDscaff33-processed-gene-38.6-mRNA-1	71139.XP_010036307.1	1.6e-117	429.1	carbonic anhydrase
maker-VaccDscaff33-augustus-gene-42.22-mRNA-1	4096.XP_009787828.1	5.7e-105	389.8	Plant calmodulin-binding domain
maker-VaccDscaff33-augustus-gene-45.34-mRNA-1	4098.XP_009621063.1	1.1e-15	89.4	Phytosulfokine precursor protein (PSK)
augustus_masked-VaccDscaff33-processed-gene-47.1-mRNA-1	4098.XP_009590884.1	2.5e-53	215.3	DNA-binding domain in plant proteins
maker-VaccDscaff33-snap-gene-61.37-mRNA-1	4155.Migut.L01797.1.p	9.9e-243	845.9	Belongs to the glycosyl hydrolase 32 family
snap_masked-VaccDscaff33-processed-gene-62.9-mRNA-1	4432.XP_010260126.1	3.1e-14	84.7	Nucleolar protein
maker-VaccDscaff33-snap-gene-64.35-mRNA-1	29760.VIT_08s0007g02870.t01	8.1e-122	443.7	MRNA-decapping enzyme-like protein
maker-VaccDscaff33-augustus-gene-65.25-mRNA-1	29760.VIT_08s0007g02820.t01	1.2e-71	276.6
maker-VaccDscaff33-augustus-gene-70.20-mRNA-1	57918.XP_004303497.1	1.4e-58	233.0	Late embryogenesis abundant protein
maker-VaccDscaff33-augustus-gene-70.19-mRNA-1	3827.XP_004494245.1	4.7e-74	284.3	Late embryogenesis abundant protein
augustus_masked-VaccDscaff33-processed-gene-78.7-mRNA-1	4081.Solyc10g079230.1.1	1e-76	294.3	Plant protein of unknown function
maker-VaccDscaff33-augustus-gene-88.27-mRNA-1	4098.XP_009615891.1	5.8e-89	334.0	S-adenosyl-L-methionine-dependent lysine N- methyltransferase
maker-VaccDscaff33-augustus-gene-94.31-mRNA-1	3847.GLYMA14G03380.1	3.4e-38	164.5	60S ribosomal Protein
augustus_masked-VaccDscaff33-processed-gene-99.4-mRNA-1	225117.XP_009356034.1	3e-19	102.1	Domain of unknown function (DUF4539)
maker-VaccDscaff33-augustus-gene-109.26-mRNA-1	29760.VIT_08s0007g04020.t01	5.2e-94	351.3	ahl1,atahl1
augustus_masked-VaccDscaff33-processed-gene-120.6-mRNA-1	3659.XP_004140247.1	1.7e-59	236.1	LRR receptor-like serine threonine-protein kinase
snap_masked-VaccDscaff33-processed-gene-131.27-mRNA-1	3760.EMJ02980	1.3e-195	690.3	Pentatricopeptide repeat-containing protein
maker-VaccDscaff33-augustus-gene-150.25-mRNA-1	29760.VIT_13s0074g00160.t01	7.8e-139	500.0	Protein of unknown function (DUF455)
maker-VaccDscaff33-snap-gene-153.23-mRNA-1	3641.EOY18908	3e-148	531.6	Phosphoglucan phosphatase DSP4
snap_masked-VaccDscaff33-processed-gene-160.11-mRNA-1	4096.XP_009770626.1	5.7e-10	69.7
maker-VaccDscaff33-snap-gene-194.50-mRNA-1	4432.XP_010256814.1	7.2e-91	340.1	Tropinone reductase homolog
maker-VaccDscaff33-augustus-gene-206.31-mRNA-1	3641.EOY17872	8.7e-105	387.1	carboxyl
maker-VaccDscaff33-augustus-gene-221.35-mRNA-1	4155.Migut.F00618.1.p	7.9e-242	843.6	Sodium/hydrogen exchanger family
augustus_masked-VaccDscaff33-processed-gene-221.6-mRNA-1	4155.Migut.F00618.1.p	7.5e-204	717.2	Sodium/hydrogen exchanger family
maker-VaccDscaff33-snap-gene-223.26-mRNA-1	3750.XP_008345679.1	2.6e-15	89.0	CCR4-associated factor 1 homolog
maker-VaccDscaff33-snap-gene-225.36-mRNA-1	3750.XP_008345679.1	2.1e-29	136.0	CCR4-associated factor 1 homolog
augustus_masked-VaccDscaff33-processed-gene-235.10-mRNA-1	102107.XP_008230539.1	2.4e-68	265.4	Glycosylphosphatidylinositol anchor attachment 1
augustus_masked-VaccDscaff33-processed-gene-241.9-mRNA-1	4096.XP_009765938.1	1.1e-69	270.0	Transcription factor
augustus_masked-VaccDscaff33-processed-gene-243.10-mRNA-1	102107.XP_008244613.1	6.5e-43	182.2	ribonuclease H protein
maker-VaccDscaff33-augustus-gene-248.39-mRNA-1	4641.GSMUA_Achr7P07040_001	2.7e-15	88.6	Belongs to the expansin family
maker-VaccDscaff33-augustus-gene-249.34-mRNA-1	3880.AES69077	1.7e-34	153.7	Belongs to the 'GDSL' lipolytic enzyme family
maker-VaccDscaff33-snap-gene-278.45-mRNA-1	29760.VIT_16s0050g00690.t01	7.9e-221	773.9	U-box domain-containing protein
augustus_masked-VaccDscaff33-processed-gene-297.7-mRNA-1	29760.VIT_16s0039g02110.t01	2.2e-199	702.2	mitochondrion organization
maker-VaccDscaff33-augustus-gene-315.27-mRNA-1	2711.XP_006475564.1	2.8e-214	751.5	initiator tRNA phosphoribosyl transferase family protein
maker-VaccDscaff33-augustus-gene-323.17-mRNA-1	102107.XP_008244752.1	4.9e-47	196.1	F-Box protein
augustus_masked-VaccDscaff33-processed-gene-323.5-mRNA-1	29730.Gorai.003G063500.1	4.6e-51	208.0	transcription factor
maker-VaccDscaff33-augustus-gene-326.25-mRNA-1	29760.VIT_11s0016g02870.t01	4.6e-224	783.9	Belongs to the peptidase M16 family
maker-VaccDscaff33-augustus-gene-327.65-mRNA-1	4432.XP_010277770.1	1.7e-291	1008.1	ketol-acid reductoisomerase
maker-VaccDscaff45-augustus-gene-8.26-mRNA-1	3983.cassava4.1_011664m	6.8e-146	524.2	Ubiquitin carboxyl-terminal hydrolase
maker-VaccDscaff45-snap-gene-17.35-mRNA-1	3750.XP_008375654.1	4.6e-223	781.6	TMV resistance protein N-like
maker-VaccDscaff45-augustus-gene-17.26-mRNA-1	3694.POPTR_0007s04750.1	4.4e-138	498.8	TMV resistance protein N-like
maker-VaccDscaff45-snap-gene-27.35-mRNA-1	4098.XP_009629941.1	7.5e-250	870.2	Lignin degradation and detoxification of lignin-derived products
snap_masked-VaccDscaff45-processed-gene-40.18-mRNA-1	4098.XP_009609693.1	3e-08	64.7	protein phosphatase 2C 25
augustus_masked-VaccDscaff45-processed-gene-41.5-mRNA-1	57918.XP_004294300.1	4.1e-19	101.3	phosphatase 2c
maker-VaccDscaff45-augustus-gene-44.36-mRNA-1	4081.Solyc09g014520.2.1	8.5e-146	523.1	The light-harvesting complex (LHC) functions as a light receptor
augustus_masked-VaccDscaff45-processed-gene-47.13-mRNA-1	3641.EOY26018	1.2e-43	184.5	Conserved oligomeric Golgi complex subunit
augustus_masked-VaccDscaff45-processed-gene-67.3-mRNA-1	3641.EOY04379	2.4e-62	245.4	calcium-binding protein
maker-VaccDscaff45-augustus-gene-68.13-mRNA-1	29760.VIT_03s0063g01750.t01	3.2e-274	951.0	Belongs to the PI3 PI4-kinase family
maker-VaccDscaff45-augustus-gene-76.22-mRNA-1	4113.PGSC0003DMT400080650	3.3e-85	321.2	Polyadenylate-binding protein 2-like
maker-VaccDscaff45-augustus-gene-82.29-mRNA-1	4432.XP_010263002.1	7.5e-138	496.5	Ribosome biogenesis protein NSA2 homolog
maker-VaccDscaff45-snap-gene-91.33-mRNA-1	4538.ORGLA01G0200700.1	1.1e-28	134.0	Plant transposase (Ptta/En/Spm family)
augustus_masked-VaccDscaff45-processed-gene-96.7-mRNA-1	3641.EOX97042	8.8e-21	107.1
maker-VaccDscaff45-augustus-gene-107.22-mRNA-1	29760.VIT_12s0035g01920.t01	0.0	1707.6	Methionine S-methyltransferase
maker-VaccDscaff45-augustus-gene-132.17-mRNA-1	29760.VIT_14s0060g01160.t01	0.0	1365.5	isoform X1
augustus_masked-VaccDscaff45-processed-gene-162.8-mRNA-1	3641.EOY23100	3.7e-38	166.8	Plant mobile domain
augustus_masked-VaccDscaff45-processed-gene-184.0-mRNA-1	225117.XP_009362951.1	0.0	1215.7	Pentatricopeptide repeat-containing protein
augustus_masked-VaccDscaff45-processed-gene-201.6-mRNA-1	3641.EOY23100	3.6e-36	160.6	Plant mobile domain
maker-VaccDscaff45-augustus-gene-203.33-mRNA-1	4432.XP_010266778.1	5.2e-47	194.5
maker-VaccDscaff45-augustus-gene-209.29-mRNA-1	4098.XP_009625187.1	7.5e-57	226.9	LOB domain-containing protein
augustus_masked-VaccDscaff45-processed-gene-209.1-mRNA-1	3641.EOY04076	1.7e-37	165.2	Plant mobile domain
maker-VaccDscaff45-augustus-gene-225.31-mRNA-1	3694.POPTR_0009s11290.1	2.4e-40	172.6	Cold-regulated 413 plasma membrane protein
maker-VaccDscaff45-augustus-gene-229.20-mRNA-1	3641.EOY21710	3.5e-69	268.5	integral membrane HPP family protein
maker-VaccDscaff45-snap-gene-233.37-mRNA-1	3983.cassava4.1_003101m	1.9e-233	815.5	beta-1,3-galactosyltransferase 19
maker-VaccDscaff117-snap-gene-3.83-mRNA-1	3988.XP_002512882.1	1e-181	643.7	protein At2g33490-like isoform
maker-VaccDscaff77-snap-gene-6.86-mRNA-1	29760.VIT_00s0229g00110.t01	0.0	1209.1	atg2484-1,g2484-1
maker-VaccDscaff191-augustus-gene-1.51-mRNA-1	3760.EMJ07869	6e-22	110.5	Dehydrogenase
maker-VaccDscaff191-augustus-gene-1.59-mRNA-1	42345.XP_008803504.1	5.8e-15	86.7	Belongs to the alternative oxidase family
maker-VaccDscaff259-augustus-gene-0.45-mRNA-1	28532.XP_010538460.1	1.8e-14	85.9
maker-VaccDscaff115-augustus-gene-2.38-mRNA-1	3983.cassava4.1_029705m	6.2e-179	634.0	Involved in modulation of pathogen defense and leaf cell death
augustus_masked-VaccDscaff1062-processed-gene-0.2-mRNA-1	3983.cassava4.1_024796m	6.5e-35	154.1	Cysteine-rich receptor-like protein kinase
maker-VaccDscaff56-snap-gene-3.47-mRNA-1	29760.VIT_00s0449g00010.t01	9.7e-38	163.3	Belongs to the membrane-bound acyltransferase family
augustus_masked-VaccDscaff56-processed-gene-7.1-mRNA-1	3750.XP_008353355.1	6.9e-36	157.1	Protein GLUTAMINE DUMPER
maker-VaccDscaff56-augustus-gene-10.24-mRNA-1	225117.XP_009376558.1	4.3e-255	887.9	tetratricopeptide repeat protein
augustus_masked-VaccDscaff304-processed-gene-0.1-mRNA-1	3641.EOY23100	5.8e-23	116.7	Plant mobile domain
maker-VaccDscaff132-augustus-gene-2.36-mRNA-1	29760.VIT_04s0023g00600.t01	1.7e-125	455.7	Isopentenyl-diphosphate delta-isomerase
maker-VaccDscaff11-augustus-gene-9.17-mRNA-1	29760.VIT_06s0004g00570.t01	3.6e-81	308.5	RNA polymerase II transcription regulator recruiting activity
augustus_masked-VaccDscaff11-processed-gene-29.4-mRNA-1	29760.VIT_06s0004g01670.t01	4.9e-170	604.4	Belongs to the UDP-glycosyltransferase family
maker-VaccDscaff11-snap-gene-37.27-mRNA-1	3988.XP_002527066.1	2e-110	405.2	Serine threonine-protein phosphatase
maker-VaccDscaff11-snap-gene-53.30-mRNA-1	4098.XP_009618540.1	1.8e-247	861.7	ATP-NAD kinase
maker-VaccDscaff11-snap-gene-65.26-mRNA-1	3694.POPTR_0009s05210.1	4.2e-153	548.9	Acts as a Mg(2 ) transporter
maker-VaccDscaff11-augustus-gene-69.17-mRNA-1	3641.EOY23100	1.1e-36	162.5	Plant mobile domain
augustus_masked-VaccDscaff11-processed-gene-71.7-mRNA-1	3641.EOY23100	1.6e-37	165.2	Plant mobile domain
augustus_masked-VaccDscaff11-processed-gene-103.4-mRNA-1	218851.Aquca_008_00259.1	1.2e-18	100.9	Domain of unknown function (DUF4283)
augustus_masked-VaccDscaff11-processed-gene-105.7-mRNA-1	57918.XP_004301250.1	1.3e-15	89.7	Domain of unknown function (DUF4539)
maker-VaccDscaff11-augustus-gene-113.28-mRNA-1	4113.PGSC0003DMT400050521	5.4e-52	211.5	Late embryogenesis abundant protein
maker-VaccDscaff11-augustus-gene-135.23-mRNA-1	3641.EOY27979	5.6e-72	277.7	transcription
maker-VaccDscaff11-snap-gene-146.26-mRNA-1	4113.PGSC0003DMT400059123	1.8e-186	659.4	Belongs to the Ca(2 ) cation antiporter (CaCA)
augustus_masked-VaccDscaff11-processed-gene-154.7-mRNA-1	3641.EOY23100	2.2e-21	111.3	Plant mobile domain
maker-VaccDscaff11-augustus-gene-157.19-mRNA-1	29760.VIT_10s0003g00150.t01	7.6e-258	896.3	MACPF domain-containing protein
maker-VaccDscaff11-snap-gene-165.28-mRNA-1	4432.XP_010242791.1	1.8e-93	349.7	magnesium transporter
maker-VaccDscaff11-snap-gene-166.44-mRNA-1	4432.XP_010242791.1	2e-90	339.7	magnesium transporter
augustus_masked-VaccDscaff11-processed-gene-166.19-mRNA-1	3656.XP_008465661.1	1.4e-13	85.5	Serine threonine-protein phosphatase 7 long form homolog
snap_masked-VaccDscaff11-processed-gene-170.9-mRNA-1	3988.XP_002528430.1	1.1e-29	136.7	RPAP1-like, N-terminal
maker-VaccDscaff11-snap-gene-174.22-mRNA-1	4006.Lus10011232	2.7e-202	712.2	endonuclease
augustus_masked-VaccDscaff11-processed-gene-183.8-mRNA-1	3760.EMJ27390	2.8e-38	167.9	Plant mobile domain
snap_masked-VaccDscaff11-processed-gene-184.12-mRNA-1	102107.XP_008225019.1	4.1e-16	90.5	Reverse transcriptase-like
snap_masked-VaccDscaff11-processed-gene-186.19-mRNA-1	102107.XP_008224916.1	1.7e-53	216.5	RNA polymerase II transcription regulator recruiting activity
maker-VaccDscaff11-snap-gene-196.24-mRNA-1	29760.VIT_10s0116g00280.t01	1.9e-57	229.6	UDP-3-O-acylglucosamine N-acyltransferase 2 mitochondrial
maker-VaccDscaff11-snap-gene-201.33-mRNA-1	29760.VIT_00s0992g00020.t01	1.1e-50	206.1	Belongs to the small heat shock protein (HSP20) family
augustus_masked-VaccDscaff11-processed-gene-204.1-mRNA-1	29730.Gorai.009G178800.1	7e-36	157.1	Senescence regulator
maker-VaccDscaff11-augustus-gene-209.24-mRNA-1	29760.VIT_19s0090g00940.t01	1.8e-96	359.8	Ribonuclease 3-like protein
maker-VaccDscaff11-snap-gene-224.44-mRNA-1	29760.VIT_01s0011g01080.t01	7e-209	733.4	N-methyltransferase
maker-VaccDscaff11-augustus-gene-235.20-mRNA-1	3641.EOY27518	5.3e-75	288.1	BOI-related E3 ubiquitin-protein ligase
maker-VaccDscaff11-augustus-gene-236.23-mRNA-1	102107.XP_008225745.1	0.0	1097.4	Belongs to the argonaute family
snap_masked-VaccDscaff11-processed-gene-237.19-mRNA-1	29760.VIT_07s0005g03860.t01	8e-66	257.7	Mitochondrial transcription termination factor family protein
augustus_masked-VaccDscaff11-processed-gene-241.4-mRNA-1	3641.EOY23100	1.4e-36	162.2	Plant mobile domain
maker-VaccDscaff11-snap-gene-249.30-mRNA-1	3641.EOY25660	4.6e-194	684.5	Belongs to the oxygen-dependent FAD-linked oxidoreductase
augustus_masked-VaccDscaff11-processed-gene-255.9-mRNA-1	2711.XP_006467336.1	2e-27	129.4
augustus_masked-VaccDscaff11-processed-gene-255.8-mRNA-1	3750.XP_008366078.1	4.7e-122	444.5	acyl-CoA--sterol O-acyltransferase 1-like
maker-VaccDscaff11-augustus-gene-258.23-mRNA-1	29760.VIT_10s0003g04560.t01	0.0	2442.5	187-kDa microtubule-associated protein
snap_masked-VaccDscaff11-processed-gene-269.14-mRNA-1	29760.VIT_10s0003g04340.t01	6.6e-62	243.4	Glucan endo-13-beta-glucosidase
augustus_masked-VaccDscaff11-processed-gene-278.8-mRNA-1	4096.XP_009804376.1	5.2e-216	756.9	9-cis-epoxy-carotenoid dioxygenase
snap_masked-VaccDscaff11-processed-gene-279.24-mRNA-1	3880.AES72963	4.7e-299	1033.9	Pentatricopeptide repeat-containing protein
maker-VaccDscaff11-augustus-gene-281.29-mRNA-1	3649.evm.model.supercontig_32.23	3e-87	328.2	EF-hand, calcium binding motif
maker-VaccDscaff11-augustus-gene-282.24-mRNA-1	77586.LPERR01G32610.1	1.2e-198	699.9	alpha/beta hydrolase fold
maker-VaccDscaff11-augustus-gene-304.23-mRNA-1	2711.XP_006488645.1	1.3e-115	423.3	late embryogenesis abundant protein-related
maker-VaccDscaff11-augustus-gene-310.23-mRNA-1	29760.VIT_06s0004g03590.t01	1.2e-141	510.0	Transcription factor
maker-VaccDscaff11-augustus-gene-314.25-mRNA-1	13333.ERN04121	1.6e-111	409.1	membrane protein At1g06890-like
maker-VaccDscaff11-augustus-gene-315.23-mRNA-1	71139.XP_010067591.1	1.7e-59	236.1	lob domain-containing protein
maker-VaccDscaff11-snap-gene-318.39-mRNA-1	3641.EOY34625	1.8e-25	122.1	Belongs to the 'GDSL' lipolytic enzyme family
maker-VaccDscaff11-snap-gene-327.45-mRNA-1	29760.VIT_06s0004g04190.t01	1.1e-136	493.8	TPL-binding domain in jasmonate signalling
maker-VaccDscaff11-snap-gene-331.45-mRNA-1	29760.VIT_06s0004g04580.t01	2.4e-302	1044.6	U-box domain-containing protein
maker-VaccDscaff11-snap-gene-338.47-mRNA-1	29760.VIT_06s0004g05250.t01	3.8e-165	589.0	fringe-related protein
maker-VaccDscaff11-augustus-gene-341.45-mRNA-1	4096.XP_009763196.1	1.1e-197	696.4	Major Facilitator Superfamily
augustus_masked-VaccDscaff11-processed-gene-341.7-mRNA-1	225117.XP_009356034.1	9.3e-21	107.1	Domain of unknown function (DUF4539)
augustus_masked-VaccDscaff11-processed-gene-346.7-mRNA-1	4432.XP_010272203.1	3.1e-144	519.6	Ubiquitin carboxyl-terminal hydrolase-related protein
maker-VaccDscaff11-augustus-gene-350.30-mRNA-1	29730.Gorai.001G228500.1	2.7e-25	122.1	Transcription factor IBH1-like
snap_masked-VaccDscaff11-processed-gene-356.13-mRNA-1	29760.VIT_06s0004g07230.t01	7.7e-100	370.5	UDP-Glycosyltransferase
maker-VaccDscaff11-snap-gene-357.64-mRNA-1	3983.cassava4.1_012740m	2.5e-113	415.2	Tetratricopeptide repeat
augustus_masked-VaccDscaff11-processed-gene-361.2-mRNA-1	3988.XP_002533627.1	2.7e-254	884.8	WD domain, G-beta repeat
snap_masked-VaccDscaff11-processed-gene-369.30-mRNA-1	29760.VIT_07s0005g03060.t01	7.2e-147	526.9	Belongs to the iron ascorbate-dependent oxidoreductase family
maker-VaccDscaff11-snap-gene-377.38-mRNA-1	3641.EOX94746	4e-270	937.6	Belongs to the terpene synthase family
augustus_masked-VaccDscaff11-processed-gene-377.6-mRNA-1	3641.EOX94746	2.9e-276	958.4	Belongs to the terpene synthase family
maker-VaccDscaff11-augustus-gene-378.28-mRNA-1	29760.VIT_07s0104g00500.t01	5.9e-92	344.4
maker-VaccDscaff11-augustus-gene-379.25-mRNA-1	4432.XP_010255916.1	3.5e-183	647.9	Protein trichome birefringence-like
maker-VaccDscaff11-snap-gene-382.43-mRNA-1	4432.XP_010278953.1	8.4e-154	550.1	Belongs to the 'GDSL' lipolytic enzyme family
snap_masked-VaccDscaff11-processed-gene-383.12-mRNA-1	4098.XP_009622634.1	1.1e-172	614.0	Zinc finger, C3HC4 type (RING finger)
maker-VaccDscaff11-augustus-gene-383.33-mRNA-1	29760.VIT_07s0104g00900.t01	1.1e-80	306.2	LEC14B protein
augustus_masked-VaccDscaff11-processed-gene-386.2-mRNA-1	3641.EOX95006	1.1e-81	310.5	Glutathione S-transferase, C-terminal domain
snap_masked-VaccDscaff11-processed-gene-391.11-mRNA-1	29760.VIT_07s0005g00940.t01	0.0	1433.3	Belongs to the TRAFAC class myosin-kinesin ATPase
augustus_masked-VaccDscaff11-processed-gene-392.10-mRNA-1	29760.VIT_07s0005g01310.t01	2e-41	177.2	Multidrug resistance protein ABC transporter family protein
augustus_masked-VaccDscaff11-processed-gene-395.0-mRNA-1	3641.EOY00717	1.8e-16	92.0	Transcription factor
augustus_masked-VaccDscaff315-processed-gene-0.0-mRNA-1	3641.EOY04076	1.8e-35	158.3	Plant mobile domain
maker-VaccDscaff108-snap-gene-3.33-mRNA-1	29760.VIT_15s0048g02880.t01	8.7e-52	209.9	membrane protein At1g16860-like
maker-VaccDscaff55-snap-gene-2.35-mRNA-1	3649.evm.model.supercontig_115.64	0.0	1619.4	Magnesium-dependent enzyme
maker-VaccDscaff55-snap-gene-6.33-mRNA-1	29760.VIT_11s0052g00650.t01	7.3e-16	89.7	Belongs to the peroxidase family
maker-VaccDscaff55-augustus-gene-7.20-mRNA-1	225117.XP_009376558.1	1.1e-260	906.4	tetratricopeptide repeat protein
maker-VaccDscaff55-snap-gene-8.35-mRNA-1	3649.evm.model.supercontig_21.85	6.6e-211	740.3	homoserine dehydrogenase
augustus_masked-VaccDscaff55-processed-gene-10.6-mRNA-1	3750.XP_008353355.1	6.9e-36	157.1	Protein GLUTAMINE DUMPER
augustus_masked-VaccDscaff678-processed-gene-0.0-mRNA-1	29760.VIT_12s0057g00710.t01	6.4e-245	853.6	DNAJ heat shock N-terminal domain-containing protein
augustus_masked-VaccDscaff162-processed-gene-0.1-mRNA-1	3641.EOY23100	4.9e-42	179.9	Plant mobile domain
snap_masked-VaccDscaff264-processed-gene-0.30-mRNA-1	3885.XP_007140535.1	1.3e-21	111.7
maker-VaccDscaff58-snap-gene-2.29-mRNA-1	29760.VIT_19s0027g01670.t01	1.3e-33	149.8	Belongs to the cyclin family
augustus_masked-VaccDscaff58-processed-gene-4.11-mRNA-1	4096.XP_009775190.1	1e-15	91.3
maker-VaccDscaff88-snap-gene-0.22-mRNA-1	4432.XP_010277298.1	1.3e-146	526.2	C2 domain
maker-VaccDscaff130-augustus-gene-0.21-mRNA-1	3983.cassava4.1_010419m	5.6e-167	594.0	Lactoylglutathione lyase
maker-VaccDscaff6-augustus-gene-1.18-mRNA-1	57918.XP_004293816.1	3.3e-80	305.8	Myb family transcription factor APL-like
augustus_masked-VaccDscaff6-processed-gene-11.3-mRNA-1	29760.VIT_19s0015g01810.t01	3e-222	779.2	expressed protein
augustus_masked-VaccDscaff6-processed-gene-19.7-mRNA-1	4081.Solyc07g065460.1.1	2.7e-22	111.3	Encoded by
maker-VaccDscaff6-snap-gene-19.40-mRNA-1	102107.XP_008242989.1	3e-10	72.0	26S proteasome non-ATPase regulatory subunit
augustus_masked-VaccDscaff6-processed-gene-28.7-mRNA-1	3641.EOY04076	1.2e-36	162.5	Plant mobile domain
maker-VaccDscaff6-snap-gene-34.50-mRNA-1	71139.XP_010064948.1	7.9e-07	60.5	glycerophosphoryl diester phosphodiesterase
maker-VaccDscaff6-augustus-gene-34.42-mRNA-1	3750.XP_008366427.1	8.9e-148	529.6	Belongs to the pirin family
maker-VaccDscaff6-augustus-gene-36.29-mRNA-1	4432.XP_010270100.1	1.4e-156	559.7	BPI LBP family protein
maker-VaccDscaff6-augustus-gene-38.29-mRNA-1	2711.XP_006475020.1	1.2e-202	712.6	GDP-L-galactose phosphorylase
maker-VaccDscaff6-augustus-gene-39.31-mRNA-1	4536.ONIVA01G31710.1	3.2e-115	423.3	belongs to the protein kinase superfamily
maker-VaccDscaff6-snap-gene-40.34-mRNA-1	4098.XP_009599597.1	4.9e-229	800.8	Rab3 GTPase-activating protein catalytic subunit
augustus_masked-VaccDscaff6-processed-gene-42.9-mRNA-1	3641.EOY23100	1.1e-39	172.6	Plant mobile domain
maker-VaccDscaff6-snap-gene-44.45-mRNA-1	3641.EOY12446	5.3e-46	192.2	Plant mobile domain
maker-VaccDscaff6-snap-gene-47.44-mRNA-1	57918.XP_004301968.1	2.1e-97	364.8	F-box FBD LRR-repeat protein
augustus_masked-VaccDscaff6-processed-gene-58.7-mRNA-1	3988.XP_002520526.1	3.4e-243	847.8	L-type lectin-domain containing receptor kinase
maker-VaccDscaff6-augustus-gene-61.26-mRNA-1	4155.Migut.H01897.1.p	6.4e-203	713.8	Diacylglycerol kinase accessory domain (presumed)
snap_masked-VaccDscaff6-processed-gene-61.23-mRNA-1	29760.VIT_05s0124g00600.t01	1.3e-20	106.7	ankyrin repeat-containing protein
augustus_masked-VaccDscaff6-processed-gene-64.8-mRNA-1	3983.cassava4.1_001949m	3.3e-13	80.9	Receptor-like protein kinase THESEUS
maker-VaccDscaff6-augustus-gene-68.31-mRNA-1	3983.cassava4.1_016307m	2.5e-91	341.7	Belongs to the eukaryotic ribosomal protein eL13 family
augustus_masked-VaccDscaff6-processed-gene-72.3-mRNA-1	3760.EMJ19112	8.7e-283	979.5	ABC transporter C family member
maker-VaccDscaff6-snap-gene-77.23-mRNA-1	2711.XP_006469501.1	9e-192	676.8	zinc finger CCCH domain-containing protein
augustus_masked-VaccDscaff6-processed-gene-93.3-mRNA-1	3649.evm.model.supercontig_250.11	3.1e-123	448.4	NADP-dependent alkenal double bond reductase
maker-VaccDscaff6-augustus-gene-114.13-mRNA-1	29760.VIT_12s0134g00400.t01	6.8e-32	144.4	Zinc finger protein
snap_masked-VaccDscaff6-processed-gene-130.11-mRNA-1	29760.VIT_16s0022g00960.t01	3.9e-13	81.3	21 kDa protein-like
maker-VaccDscaff6-augustus-gene-147.32-mRNA-1	3988.XP_002525147.1	1.7e-113	416.0	Belongs to the peptidase C1 family
augustus_masked-VaccDscaff6-processed-gene-148.0-mRNA-1	3694.POPTR_0019s12110.1	4.2e-52	211.8	transcription factor
maker-VaccDscaff6-augustus-gene-159.19-mRNA-1	29760.VIT_01s0011g02190.t01	7.7e-204	716.8	Rgp1
maker-VaccDscaff6-snap-gene-189.19-mRNA-1	3641.EOY17209	3.9e-105	388.3	(NAC) domain-containing protein
maker-VaccDscaff6-augustus-gene-201.28-mRNA-1	3983.cassava4.1_006525m	3.6e-97	361.7	Exostosin family
augustus_masked-VaccDscaff6-processed-gene-201.6-mRNA-1	225117.XP_009356034.1	1.9e-16	92.4	Domain of unknown function (DUF4539)
maker-VaccDscaff6-snap-gene-206.26-mRNA-1	29760.VIT_11s0052g01200.t01	2.1e-54	218.4	Catalyzes xyloglucan endohydrolysis and endotransglycosylation
augustus_masked-VaccDscaff6-processed-gene-243.1-mRNA-1	4113.PGSC0003DMT400039052	9.2e-112	411.4
augustus_masked-VaccDscaff6-processed-gene-247.8-mRNA-1	3760.EMJ27390	6.5e-22	113.2	Plant mobile domain
augustus_masked-VaccDscaff6-processed-gene-248.6-mRNA-1	102107.XP_008227342.1	1.3e-10	75.5	Serine threonine-protein phosphatase 7 long form homolog
augustus_masked-VaccDscaff6-processed-gene-249.3-mRNA-1	3641.EOY23100	4.3e-29	137.1	Plant mobile domain
maker-VaccDscaff6-snap-gene-255.20-mRNA-1	29760.VIT_15s0048g02880.t01	5e-107	394.4	membrane protein At1g16860-like
augustus_masked-VaccDscaff6-processed-gene-261.14-mRNA-1	981085.XP_010087093.1	2.9e-11	77.0	Serine threonine-protein phosphatase 7 long form homolog
maker-VaccDscaff6-augustus-gene-270.31-mRNA-1	3880.AES74425	7e-18	97.1	Belongs to the small GTPase superfamily. Arf family
augustus_masked-VaccDscaff6-processed-gene-277.6-mRNA-1	3760.EMJ27390	6.2e-13	83.6	Plant mobile domain
maker-VaccDscaff6-augustus-gene-279.25-mRNA-1	3988.XP_002521558.1	9.7e-148	529.6	Belongs to the major facilitator superfamily
maker-VaccDscaff6-augustus-gene-290.28-mRNA-1	29760.VIT_14s0128g00370.t01	2.9e-230	804.3	Serine--tRNA
maker-VaccDscaff6-augustus-gene-295.40-mRNA-1	3827.XP_004503064.1	3e-49	201.4	GDP-mannose transporter
maker-VaccDscaff6-augustus-gene-306.19-mRNA-1	102107.XP_008232941.1	4.8e-218	763.5	cytoskeleton organization
maker-VaccDscaff6-snap-gene-314.35-mRNA-1	29760.VIT_07s0031g01780.t01	3.2e-223	781.2	tRNAHis guanylyltransferase
maker-VaccDscaff6-snap-gene-314.41-mRNA-1	3983.cassava4.1_015011m	2.3e-17	94.7	ATP synthase 24 kDa subunit
maker-VaccDscaff6-augustus-gene-326.32-mRNA-1	4081.Solyc04g054520.2.1	6.8e-76	290.4	peptidyl-prolyl cis-trans isomerase
maker-VaccDscaff6-augustus-gene-336.30-mRNA-1	29760.VIT_00s0742g00020.t01	3e-26	124.8	ribosomal protein L23
augustus_masked-VaccDscaff6-processed-gene-353.2-mRNA-1	3983.cassava4.1_020104m	6.1e-22	110.5
maker-VaccDscaff6-snap-gene-362.20-mRNA-1	3880.AES95941	1.2e-214	753.1	Alcohol dehydrogenase GroES-like domain
augustus_masked-VaccDscaff6-processed-gene-372.0-mRNA-1	3760.EMJ27390	2.8e-38	167.9	Plant mobile domain
snap_masked-VaccDscaff6-processed-gene-379.12-mRNA-1	3983.cassava4.1_032094m	1.1e-140	508.1	disease resistance
maker-VaccDscaff6-augustus-gene-396.24-mRNA-1	4113.PGSC0003DMT400029056	1.2e-233	815.5	BTB/POZ domain
maker-VaccDscaff6-augustus-gene-397.36-mRNA-1	3641.EOY29544	0.0	1131.3	Belongs to the nonaspanin (TM9SF) (TC 9.A.2) family
augustus_masked-VaccDscaff6-processed-gene-400.6-mRNA-1	4098.XP_009602470.1	2.9e-70	272.7	Vinorine synthase-like
maker-VaccDscaff6-snap-gene-404.23-mRNA-1	4096.XP_009760909.1	3.7e-202	711.1	Lignin degradation and detoxification of lignin-derived products
maker-VaccDscaff6-augustus-gene-404.19-mRNA-1	29760.VIT_11s0037g00560.t01	3.6e-170	605.1	QWRF motif-containing protein
maker-VaccDscaff6-augustus-gene-407.25-mRNA-1	3988.XP_002528386.1	0.0	1943.7	Translation initiation factor eIF3 subunit 135
maker-VaccDscaff6-augustus-gene-425.25-mRNA-1	3694.POPTR_0012s03330.1	6.1e-108	397.5	Endonuclease I
maker-VaccDscaff406-augustus-gene-0.15-mRNA-1	225117.XP_009376558.1	2.8e-275	954.9	tetratricopeptide repeat protein
maker-VaccDscaff106-augustus-gene-1.22-mRNA-1	3641.EOY27518	2e-77	296.2	BOI-related E3 ubiquitin-protein ligase
maker-VaccDscaff63-augustus-gene-0.13-mRNA-1	225117.XP_009353452.1	1.1e-10	73.2	LRR receptor-like serine threonine-protein kinase
snap_masked-VaccDscaff63-processed-gene-3.9-mRNA-1	3694.POPTR_0014s16660.1	5.3e-60	238.4	ABC1 family
snap_masked-VaccDscaff63-processed-gene-3.6-mRNA-1	3694.POPTR_0014s16660.1	5.3e-60	238.4	ABC1 family
augustus_masked-VaccDscaff63-processed-gene-7.5-mRNA-1	4432.XP_010275010.1	9.1e-17	94.7
snap_masked-VaccDscaff337-processed-gene-0.17-mRNA-1	981085.XP_010110952.1	3.8e-148	531.2	Pyruvate dehydrogenase E1 component subunit
maker-VaccDscaff337-augustus-gene-0.26-mRNA-1	4096.XP_009768396.1	1.5e-15	89.7	Domain of unknown function (DUF3511)
augustus_masked-VaccDscaff337-processed-gene-0.1-mRNA-1	29760.VIT_05s0077g01390.t01	7.7e-26	123.6	Zinc finger protein
augustus_masked-VaccDscaff7-processed-gene-5.5-mRNA-1	3694.POPTR_0002s01290.1	3.9e-82	311.6	Arabidopsis protein of unknown function
maker-VaccDscaff7-augustus-gene-7.31-mRNA-1	3983.cassava4.1_029705m	4.9e-181	641.0	Involved in modulation of pathogen defense and leaf cell death
augustus_masked-VaccDscaff7-processed-gene-7.12-mRNA-1	3641.EOY09135	0.0	1102.4	N-terminal C2 in EEIG1 and EHBP1 proteins
snap_masked-VaccDscaff7-processed-gene-19.16-mRNA-1	161934.XP_010692652.1	1.5e-20	105.1	Belongs to the cytochrome P450 family
augustus_masked-VaccDscaff7-processed-gene-25.8-mRNA-1	29760.VIT_18s0001g10810.t01	7.8e-129	466.8	Carboxylesterase
maker-VaccDscaff7-snap-gene-26.37-mRNA-1	29760.VIT_18s0001g10910.t01	1.1e-170	606.3	lipolytic acyl hydrolase (LAH)
maker-VaccDscaff7-augustus-gene-28.35-mRNA-1	4432.XP_010255087.1	1.2e-106	393.3	Thylakoidal processing peptidase
snap_masked-VaccDscaff7-processed-gene-32.11-mRNA-1	981085.XP_010086586.1	3.1e-22	111.3	Topless-related protein
maker-VaccDscaff7-snap-gene-34.28-mRNA-1	4113.PGSC0003DMT400039957	1.9e-155	556.6	Protein phosphatase 2C 55
maker-VaccDscaff7-snap-gene-39.40-mRNA-1	4113.PGSC0003DMT400056264	2.2e-92	347.4	Belongs to the disease resistance NB-LRR family
augustus_masked-VaccDscaff7-processed-gene-56.0-mRNA-1	4098.XP_009587527.1	2.8e-131	475.3	Protein PHLOEM PROTEIN 2-LIKE
maker-VaccDscaff7-snap-gene-59.37-mRNA-1	2711.XP_006472361.1	3.7e-10	72.0	50S ribosomal protein 6
maker-VaccDscaff7-augustus-gene-72.28-mRNA-1	3694.POPTR_0005s27290.1	6.2e-191	673.7	Belongs to the protein kinase superfamily
snap_masked-VaccDscaff7-processed-gene-75.12-mRNA-1	3760.EMJ26203	6.5e-77	294.7	Clathrin assembly protein
maker-VaccDscaff7-augustus-gene-94.25-mRNA-1	4113.PGSC0003DMT400056264	1.9e-126	460.3	Belongs to the disease resistance NB-LRR family
augustus_masked-VaccDscaff7-processed-gene-102.5-mRNA-1	3641.EOY15947	3.5e-87	328.6	GDSL esterase lipase
maker-VaccDscaff7-snap-gene-103.31-mRNA-1	3983.cassava4.1_022374m	1.1e-121	443.4	Acetylajmalan esterase-like
augustus_masked-VaccDscaff7-processed-gene-118.5-mRNA-1	29760.VIT_06s0009g02770.t01	1.5e-56	225.7	Splicing factor 3B subunit 6-like protein
maker-VaccDscaff7-augustus-gene-124.43-mRNA-1	3760.EMJ27390	2.2e-38	168.3	Plant mobile domain
maker-VaccDscaff7-snap-gene-148.20-mRNA-1	29760.VIT_02s0087g00170.t01	8.9e-102	376.3	Belongs to the protein kinase superfamily
maker-VaccDscaff7-snap-gene-155.32-mRNA-1	4432.XP_010277273.1	1.7e-237	828.6	aspartate--tRNA ligase
maker-VaccDscaff7-snap-gene-166.29-mRNA-1	3694.POPTR_0006s28340.1	5.9e-151	540.4	phosphatase 2c
maker-VaccDscaff7-augustus-gene-170.24-mRNA-1	3641.EOY29228	0.0	1656.3	intracellular protein transport
augustus_masked-VaccDscaff7-processed-gene-182.8-mRNA-1	3641.EOY23100	3.2e-40	174.1	Plant mobile domain
augustus_masked-VaccDscaff7-processed-gene-189.7-mRNA-1	3760.EMJ27390	5.2e-10	73.6	Plant mobile domain
maker-VaccDscaff7-augustus-gene-221.31-mRNA-1	4096.XP_009785688.1	1.5e-148	532.7	Belongs to the UDP-glycosyltransferase family
maker-VaccDscaff7-augustus-gene-226.27-mRNA-1	29760.VIT_04s0008g03880.t01	0.0	1352.4	intracellular protein transport
maker-VaccDscaff7-augustus-gene-231.28-mRNA-1	3983.cassava4.1_019478m	1.6e-26	125.2	Early nodulin-93-like
augustus_masked-VaccDscaff7-processed-gene-246.11-mRNA-1	3641.EOY23100	1.4e-24	121.7	Plant mobile domain
maker-VaccDscaff7-augustus-gene-267.15-mRNA-1	4113.PGSC0003DMT400064322	7.4e-119	433.7	Polysaccharide biosynthesis
maker-VaccDscaff7-augustus-gene-275.21-mRNA-1	225117.XP_009372454.1	7.9e-167	593.6	Belongs to the cytochrome P450 family
maker-VaccDscaff7-snap-gene-277.27-mRNA-1	3750.XP_008340673.1	6.4e-69	268.5	MuDR family transposase
augustus_masked-VaccDscaff7-processed-gene-280.0-mRNA-1	71139.XP_010061941.1	1e-156	560.1	xyloglucan galactosyltransferase
augustus_masked-VaccDscaff7-processed-gene-302.7-mRNA-1	3641.EOY23100	8.4e-29	135.6	Plant mobile domain
maker-VaccDscaff7-augustus-gene-332.36-mRNA-1	3694.POPTR_0004s10500.1	1.8e-306	1058.1	Endo-1,3(4)-beta-glucanase
maker-VaccDscaff7-augustus-gene-332.34-mRNA-1	29760.VIT_14s0083g00300.t01	5.3e-116	424.5	Transmembrane protein 33 homolog
augustus_masked-VaccDscaff7-processed-gene-339.2-mRNA-1	4098.XP_009631792.1	6e-08	64.3	F-box associated domain
augustus_masked-VaccDscaff7-processed-gene-341.0-mRNA-1	4098.XP_009588485.1	7.1e-37	162.2	F-box associated
augustus_masked-VaccDscaff7-processed-gene-351.0-mRNA-1	3760.EMJ27390	8.3e-40	172.2	Plant mobile domain
augustus_masked-VaccDscaff7-processed-gene-355.4-mRNA-1	3760.EMJ27390	6.4e-38	166.8	Plant mobile domain
maker-VaccDscaff7-augustus-gene-357.40-mRNA-1	29730.Gorai.004G126000.1	8.4e-81	307.4	Stomatin-like protein 2
snap_masked-VaccDscaff7-processed-gene-357.25-mRNA-1	225117.XP_009360575.1	1.4e-07	63.2	Pentatricopeptide repeat-containing protein
maker-VaccDscaff7-augustus-gene-364.34-mRNA-1	3641.EOY03443	3.3e-145	521.5	(NAC) domain-containing protein
maker-VaccDscaff7-augustus-gene-373.33-mRNA-1	4096.XP_009802165.1	4e-144	518.1	Pectate lyase
maker-VaccDscaff7-augustus-gene-379.12-mRNA-1	29730.Gorai.007G078300.1	2.2e-111	409.5	Belongs to the AAA ATPase family
augustus_masked-VaccDscaff7-processed-gene-381.8-mRNA-1	4113.PGSC0003DMT400017876	1.9e-164	586.6	Leucine rich repeat N-terminal domain
maker-VaccDscaff7-augustus-gene-382.31-mRNA-1	2711.XP_006482489.1	2.1e-09	68.9	Gibberellin-regulated protein
maker-VaccDscaff7-snap-gene-388.33-mRNA-1	29730.Gorai.006G020800.1	5.3e-132	478.8	Encoded by
maker-VaccDscaff7-augustus-gene-394.19-mRNA-1	29760.VIT_19s0177g00280.t01	5e-114	417.5	4Fe-4S single cluster domain
augustus_masked-VaccDscaff7-processed-gene-404.6-mRNA-1	4641.GSMUA_Achr2P06450_001	9.6e-23	115.5	Ubiquitin carboxyl-terminal hydrolase-related protein
maker-VaccDscaff7-augustus-gene-406.29-mRNA-1	981085.XP_010087064.1	1.2e-113	416.0	Phosducin-like protein 3
snap_masked-VaccDscaff7-processed-gene-409.14-mRNA-1	3847.GLYMA10G42960.1	4.3e-13	80.1	HEAT-like repeat
maker-VaccDscaff7-snap-gene-413.31-mRNA-1	3988.XP_002512882.1	9.4e-179	633.6	protein At2g33490-like isoform
augustus_masked-VaccDscaff7-processed-gene-415.1-mRNA-1	3649.evm.model.supercontig_18.65	1.1e-10	73.2	Late embryogenesis abundant (LEA) group 1
maker-VaccDscaff86-snap-gene-4.48-mRNA-1	4096.XP_009796356.1	2.3e-35	155.6	leucine-rich repeat extensin-like protein
maker-VaccDscaff940-snap-gene-0.11-mRNA-1	29760.VIT_11s0016g03860.t01	7.6e-107	394.0	PP-loop family
augustus_masked-VaccDscaff96-processed-gene-1.14-mRNA-1	3641.EOY23100	6.4e-33	149.1	Plant mobile domain
maker-VaccDscaff96-augustus-gene-3.25-mRNA-1	4155.Migut.H00477.1.p	1.3e-192	679.5	Belongs to the cytochrome P450 family
augustus_masked-VaccDscaff96-processed-gene-4.4-mRNA-1	3641.EOY23100	3.4e-39	170.2	Plant mobile domain
snap_masked-VaccDscaff96-processed-gene-5.45-mRNA-1	3641.EOY23100	1.5e-20	107.8	Plant mobile domain
snap_masked-VaccDscaff181-processed-gene-1.27-mRNA-1	3641.EOY12746	2e-17	97.8	ribonuclease H protein At1g65750
augustus_masked-VaccDscaff255-processed-gene-0.8-mRNA-1	29760.VIT_09s0018g01330.t01	4.3e-57	228.4	fasciclin-like arabinogalactan protein
augustus_masked-VaccDscaff31-processed-gene-0.7-mRNA-1	29730.Gorai.008G098100.1	5.1e-50	205.3	F-Box protein
maker-VaccDscaff31-augustus-gene-4.23-mRNA-1	3694.POPTR_0004s10500.1	0.0	1093.6	Endo-1,3(4)-beta-glucanase
maker-VaccDscaff31-augustus-gene-4.26-mRNA-1	3641.EOY04318	7.6e-122	443.7	Transmembrane protein 33 homolog
maker-VaccDscaff31-augustus-gene-8.25-mRNA-1	71139.XP_010032637.1	1.8e-63	248.8	RuBisCO
maker-VaccDscaff31-snap-gene-17.24-mRNA-1	4098.XP_009616550.1	6.8e-49	201.1	Mate efflux family protein
augustus_masked-VaccDscaff31-processed-gene-30.7-mRNA-1	4096.XP_009758682.1	1.4e-33	149.4	alpha/beta hydrolase fold
augustus_masked-VaccDscaff31-processed-gene-30.6-mRNA-1	3750.XP_008343002.1	1.2e-22	112.1	carboxylesterase 8
maker-VaccDscaff31-snap-gene-51.19-mRNA-1	28532.XP_010531308.1	1.1e-07	63.5	Galactosyl transferase GMA12 MNN10 family protein
augustus_masked-VaccDscaff31-processed-gene-52.0-mRNA-1	3702.AT4G37690.1	4.9e-22	110.9	Galactosyl transferase GMA12 MNN10 family protein
maker-VaccDscaff31-snap-gene-54.24-mRNA-1	3641.EOX91712	9.6e-73	280.4	Telomere repeat-binding factor
augustus_masked-VaccDscaff31-processed-gene-69.4-mRNA-1	29760.VIT_18s0001g09660.t01	2.6e-28	131.3	Belongs to the cytochrome P450 family
augustus_masked-VaccDscaff31-processed-gene-91.11-mRNA-1	3641.EOY23100	3.4e-23	116.3	Plant mobile domain
maker-VaccDscaff31-augustus-gene-94.30-mRNA-1	29730.Gorai.009G326500.1	1.2e-74	286.6	dnaJ homolog subfamily B member
augustus_masked-VaccDscaff31-processed-gene-100.9-mRNA-1	3641.EOY23100	2.2e-43	184.1	Plant mobile domain
maker-VaccDscaff31-augustus-gene-121.37-mRNA-1	29760.VIT_04s0008g03880.t01	0.0	1351.7	intracellular protein transport
maker-VaccDscaff31-snap-gene-124.41-mRNA-1	3988.XP_002510683.1	9.8e-43	181.0	Glycosyl transferase family 2
maker-VaccDscaff31-augustus-gene-125.30-mRNA-1	2711.XP_006483558.1	7.2e-78	297.0	ribosomal protein
augustus_masked-VaccDscaff31-processed-gene-127.7-mRNA-1	4096.XP_009785688.1	1.9e-62	245.7	Belongs to the UDP-glycosyltransferase family
augustus_masked-VaccDscaff31-processed-gene-164.5-mRNA-1	3694.POPTR_0006s27550.1	1.2e-14	86.3
maker-VaccDscaff31-augustus-gene-175.23-mRNA-1	3641.EOY29228	0.0	1653.6	intracellular protein transport
maker-VaccDscaff31-augustus-gene-176.20-mRNA-1	2711.XP_006480137.1	9.3e-28	131.3	Armadillo repeat-containing protein
maker-VaccDscaff31-snap-gene-177.31-mRNA-1	29760.VIT_00s0338g00010.t01	4.3e-49	203.0	F-Box protein
maker-VaccDscaff31-snap-gene-177.33-mRNA-1	29760.VIT_04s0008g06880.t01	2.2e-88	331.6	ER membrane protein complex subunit
maker-VaccDscaff31-snap-gene-178.18-mRNA-1	4113.PGSC0003DMT400075270	2.5e-65	255.4	Sigma factor PP2C-like phosphatases
maker-VaccDscaff31-augustus-gene-179.34-mRNA-1	4098.XP_009596286.1	2.5e-86	325.1	ribosomal protein L24, mitochondrial
maker-VaccDscaff31-snap-gene-181.19-mRNA-1	3641.EOY29254	0.0	1215.7	Histidine kinase
augustus_masked-VaccDscaff31-processed-gene-214.2-mRNA-1	4432.XP_010266641.1	4.2e-95	355.1	E3 ubiquitin-protein ligase
maker-VaccDscaff31-augustus-gene-215.25-mRNA-1	59689.scaffold_402096.1	3.3e-43	183.3	E3 ubiquitin-protein ligase
augustus_masked-VaccDscaff31-processed-gene-262.1-mRNA-1	2711.XP_006472643.1	4.9e-52	210.7	acetyl-coa carboxylase
augustus_masked-VaccDscaff31-processed-gene-262.2-mRNA-1	3760.EMJ27390	2.2e-38	168.3	Plant mobile domain
maker-VaccDscaff31-augustus-gene-277.41-mRNA-1	102107.XP_008219337.1	2.4e-63	248.1	protein heterodimerization activity
snap_masked-VaccDscaff31-processed-gene-279.8-mRNA-1	3760.EMJ26203	9e-81	307.4	Clathrin assembly protein
maker-VaccDscaff31-snap-gene-284.24-mRNA-1	3641.EOY12746	1.6e-18	101.3	ribonuclease H protein At1g65750
maker-VaccDscaff31-snap-gene-290.36-mRNA-1	4641.GSMUA_Achr10P02370_001	6.8e-20	102.8	RNA-binding component of the eIF-3 complex
augustus_masked-VaccDscaff31-processed-gene-296.1-mRNA-1	4098.XP_009618750.1	8.1e-91	341.3	Poly (ADP-ribose) polymerase
augustus_masked-VaccDscaff31-processed-gene-296.7-mRNA-1	2711.XP_006472361.1	1.6e-10	72.4	50S ribosomal protein 6
maker-VaccDscaff31-augustus-gene-305.38-mRNA-1	4113.PGSC0003DMT400056264	2.8e-245	855.1	Belongs to the disease resistance NB-LRR family
maker-VaccDscaff31-snap-gene-311.27-mRNA-1	4113.PGSC0003DMT400039957	2.4e-161	576.2	Protein phosphatase 2C 55
maker-VaccDscaff31-augustus-gene-317.27-mRNA-1	4432.XP_010255087.1	3.2e-107	395.2	Thylakoidal processing peptidase
maker-VaccDscaff31-snap-gene-319.53-mRNA-1	3649.evm.model.supercontig_99.13	7.2e-131	473.8	Tetrapyrrole (Corrin/Porphyrin) Methylases
augustus_masked-VaccDscaff31-processed-gene-325.5-mRNA-1	981085.XP_010097417.1	1.5e-22	112.8	DnaJ Hsp40 cysteine-rich domain superfamily protein
maker-VaccDscaff31-augustus-gene-334.37-mRNA-1	3983.cassava4.1_029705m	3.1e-191	674.9	Involved in modulation of pathogen defense and leaf cell death
maker-VaccDscaff31-snap-gene-336.36-mRNA-1	3847.GLYMA06G04440.1	9e-33	147.1	acetyltransferase At3g50280-like
augustus_masked-VaccDscaff31-processed-gene-339.4-mRNA-1	29760.VIT_18s0001g10810.t01	9.2e-130	469.9	Carboxylesterase
maker-VaccDscaff31-augustus-gene-340.15-mRNA-1	29760.VIT_18s0001g10910.t01	6.3e-171	607.1	lipolytic acyl hydrolase (LAH)
maker-VaccDscaff228-augustus-gene-0.59-mRNA-1	2711.XP_006473736.1	2.8e-227	794.7	Belongs to the glycosyl hydrolase 13 family
maker-VaccDscaff1696-augustus-gene-0.2-mRNA-1	3649.evm.model.supercontig_170.55	9e-209	733.4	Belongs to the major facilitator superfamily
augustus_masked-VaccDscaff207-processed-gene-1.6-mRNA-1	102107.XP_008218991.1	1.4e-29	136.0	Chaperone protein DNAj
augustus_masked-VaccDscaff2-processed-gene-7.5-mRNA-1	3760.EMJ09969	1.9e-48	199.1	Plant invertase/pectin methylesterase inhibitor
snap_masked-VaccDscaff2-processed-gene-8.11-mRNA-1	3760.EMJ27390	4e-37	164.1	Plant mobile domain
augustus_masked-VaccDscaff2-processed-gene-14.8-mRNA-1	29760.VIT_02s0012g00880.t01	1.1e-72	280.0	Transcription factor that specifically binds AT-rich DNA
maker-VaccDscaff2-augustus-gene-20.25-mRNA-1	3885.XP_007158661.1	2.8e-40	171.4	U6 snRNA-associated Sm-like protein
maker-VaccDscaff2-augustus-gene-32.34-mRNA-1	3750.XP_008372265.1	5.6e-142	510.8	JmjC domain-containing protein
maker-VaccDscaff2-augustus-gene-44.31-mRNA-1	2711.XP_006471475.1	3e-218	764.6	Phosphomevalonate
maker-VaccDscaff2-snap-gene-56.37-mRNA-1	4113.PGSC0003DMT400056264	5e-126	459.1	Belongs to the disease resistance NB-LRR family
maker-VaccDscaff2-snap-gene-57.28-mRNA-1	3694.POPTR_0015s04680.1	2e-92	347.4	Belongs to the protein kinase superfamily
augustus_masked-VaccDscaff2-processed-gene-59.10-mRNA-1	3760.EMJ11420	7.1e-71	273.9	protein kinase kinase
augustus_masked-VaccDscaff2-processed-gene-60.1-mRNA-1	3641.EOY23100	2e-41	178.3	Plant mobile domain
maker-VaccDscaff2-snap-gene-64.29-mRNA-1	3983.cassava4.1_024763m	1.3e-55	223.4	kDa ribonucleoprotein
maker-VaccDscaff2-snap-gene-66.23-mRNA-1	3760.EMJ23584	2.3e-22	112.5	Belongs to the glycosyl hydrolase 5 (cellulase A) family
maker-VaccDscaff2-snap-gene-111.28-mRNA-1	4081.Solyc06g073420.2.1	1.3e-223	782.3	Belongs to the major facilitator superfamily
maker-VaccDscaff2-augustus-gene-169.24-mRNA-1	3641.EOY17246	3.2e-36	157.5
augustus_masked-VaccDscaff2-processed-gene-169.7-mRNA-1	3760.EMJ00315	1.1e-37	166.0	Plant mobile domain
snap_masked-VaccDscaff2-processed-gene-170.21-mRNA-1	3988.XP_002533873.1	3.4e-24	118.6
maker-VaccDscaff2-augustus-gene-174.17-mRNA-1	29730.Gorai.005G075300.1	1.7e-175	622.5	sucrose transport protein
maker-VaccDscaff2-augustus-gene-177.20-mRNA-1	4096.XP_009758779.1	2.7e-161	575.1	Belongs to the peptidase A1 family
snap_masked-VaccDscaff2-processed-gene-179.12-mRNA-1	4096.XP_009781262.1	1.1e-08	65.5	PP2A regulatory subunit TAP46-like
snap_masked-VaccDscaff2-processed-gene-180.7-mRNA-1	4096.XP_009781262.1	1.1e-08	65.5	PP2A regulatory subunit TAP46-like
augustus_masked-VaccDscaff2-processed-gene-188.0-mRNA-1	225117.XP_009356034.1	1.2e-20	106.7	Domain of unknown function (DUF4539)
maker-VaccDscaff2-augustus-gene-190.26-mRNA-1	29760.VIT_18s0001g03180.t01	3.5e-125	454.9	WAT1-related protein
augustus_masked-VaccDscaff2-processed-gene-192.2-mRNA-1	3641.EOX92742	1.7e-126	459.5	Belongs to the peptidase A1 family
maker-VaccDscaff2-snap-gene-197.38-mRNA-1	4096.XP_009758779.1	2.9e-164	585.1	Belongs to the peptidase A1 family
augustus_masked-VaccDscaff2-processed-gene-204.4-mRNA-1	3641.EOX99607	9.4e-16	92.4	Plant mobile domain
snap_masked-VaccDscaff2-processed-gene-209.27-mRNA-1	218851.Aquca_008_00259.1	1.6e-24	120.9	Domain of unknown function (DUF4283)
augustus_masked-VaccDscaff2-processed-gene-211.8-mRNA-1	3641.EOY23100	3e-42	181.0	Plant mobile domain
maker-VaccDscaff2-snap-gene-214.35-mRNA-1	3988.XP_002515156.1	1.8e-97	362.8	FAD binding domain
maker-VaccDscaff2-augustus-gene-220.28-mRNA-1	225117.XP_009351365.1	7.5e-61	239.6	May regulate transcription elongation by RNA polymerase II
augustus_masked-VaccDscaff2-processed-gene-239.9-mRNA-1	4098.XP_009622924.1	3.7e-36	158.7	Heavy-metal-associated domain
maker-VaccDscaff2-augustus-gene-245.33-mRNA-1	71139.XP_010044758.1	5.4e-59	233.4	Mitotic spindle checkpoint protein
maker-VaccDscaff2-augustus-gene-255.31-mRNA-1	3988.XP_002515156.1	8.9e-123	447.2	FAD binding domain
maker-VaccDscaff2-snap-gene-255.40-mRNA-1	3988.XP_002515156.1	4e-116	424.9	FAD binding domain
snap_masked-VaccDscaff2-processed-gene-264.24-mRNA-1	71139.XP_010031828.1	1.9e-230	805.4	Pre-mRNA-splicing factor CWC22 homolog
maker-VaccDscaff2-snap-gene-265.30-mRNA-1	4432.XP_010272019.1	1.7e-66	258.8	Protein LSM12 homolog
maker-VaccDscaff2-snap-gene-267.48-mRNA-1	29760.VIT_01s0026g00930.t01	1.5e-155	555.8	Zinc finger MYND domain-containing protein
maker-VaccDscaff2-augustus-gene-286.26-mRNA-1	29760.VIT_01s0010g00630.t01	3.6e-69	270.0	pentatricopeptide repeat-containing protein At1g13630
augustus_masked-VaccDscaff2-processed-gene-286.3-mRNA-1	102107.XP_008221687.1	1e-241	842.8	Pentatricopeptide repeat-containing protein
maker-VaccDscaff2-snap-gene-288.54-mRNA-1	102107.XP_008243779.1	3.2e-187	661.8	Cytochrome p450
maker-VaccDscaff2-augustus-gene-295.45-mRNA-1	3641.EOY12921	7.3e-57	228.4	LRR-repeat protein
augustus_masked-VaccDscaff2-processed-gene-299.3-mRNA-1	29760.VIT_01s0011g03070.t01	1.3e-132	479.6	AP2 ERF and B3 domain-containing transcription
snap_masked-VaccDscaff2-processed-gene-303.14-mRNA-1	3983.cassava4.1_032950m	5e-08	63.9	CLAVATA3 ESR (CLE)-related protein
maker-VaccDscaff2-augustus-gene-305.33-mRNA-1	3649.evm.model.supercontig_9.127	1.7e-27	129.8	mitochondrial transcription termination factor family protein
maker-VaccDscaff2-augustus-gene-309.30-mRNA-1	29760.VIT_18s0001g15670.t01	4.9e-102	377.5	intermembrane lipid transfer activity
augustus_masked-VaccDscaff2-processed-gene-310.0-mRNA-1	3694.POPTR_0005s21130.1	2.1e-60	239.2	Dof zinc finger protein
augustus_masked-VaccDscaff2-processed-gene-312.5-mRNA-1	29760.VIT_18s0072g00690.t01	3.4e-127	461.8	Myb/SANT-like DNA-binding domain
maker-VaccDscaff2-snap-gene-313.37-mRNA-1	3694.POPTR_0002s06710.1	0.0	1636.3	Belongs to the glycosyltransferase 2 family
augustus_masked-VaccDscaff2-processed-gene-318.2-mRNA-1	4155.Migut.B00656.1.p	6.1e-35	153.3	Belongs to the universal ribosomal protein uL3 family
maker-VaccDscaff2-snap-gene-322.32-mRNA-1	4098.XP_009604978.1	1.9e-133	481.9	Belongs to the sterol desaturase family
augustus_masked-VaccDscaff2-processed-gene-327.4-mRNA-1	3750.XP_008375654.1	3.4e-231	809.3	TMV resistance protein N-like
snap_masked-VaccDscaff2-processed-gene-333.22-mRNA-1	3641.EOY11723	1.1e-239	836.3	Catalyzes oxidative pentose-phosphate pathway
maker-VaccDscaff2-augustus-gene-333.34-mRNA-1	4641.GSMUA_Achr1P24970_001	3.4e-67	261.2	Golgi membrane protein involved in vesicular trafficking
maker-VaccDscaff2-snap-gene-338.47-mRNA-1	218851.Aquca_001_00683.1	0.0	2543.1	Belongs to the ABC transporter superfamily
maker-VaccDscaff2-augustus-gene-342.26-mRNA-1	102107.XP_008246336.1	2.5e-218	765.0	Protein NRT1 PTR FAMILY 4.5-like
maker-VaccDscaff2-snap-gene-344.49-mRNA-1	40148.OGLUM08G05400.1	1.1e-101	377.1	May play a role in plant defense
maker-VaccDscaff2-snap-gene-346.27-mRNA-1	102107.XP_008246336.1	6.7e-219	766.9	Protein NRT1 PTR FAMILY 4.5-like
maker-VaccDscaff2-snap-gene-348.51-mRNA-1	42345.XP_008777419.1	2.7e-103	382.5	germin-like protein
maker-VaccDscaff2-augustus-gene-348.40-mRNA-1	3659.XP_004171130.1	3.7e-74	284.6	germin-like protein
augustus_masked-VaccDscaff2-processed-gene-350.1-mRNA-1	4081.Solyc02g078030.1.1	8e-26	123.6	VQ motif
augustus_masked-VaccDscaff2-processed-gene-355.3-mRNA-1	3988.XP_002527837.1	4.7e-13	81.3
maker-VaccDscaff2-snap-gene-355.27-mRNA-1	3641.EOY25743	5.1e-277	960.3	Mitotic checkpoint family protein
maker-VaccDscaff2-snap-gene-364.39-mRNA-1	4096.XP_009776069.1	5e-173	614.0	COBRA-like protein 6
maker-VaccDscaff2-augustus-gene-365.28-mRNA-1	102107.XP_008218556.1	1.9e-168	599.0	Belongs to the protein kinase superfamily
maker-VaccDscaff2-snap-gene-376.25-mRNA-1	4096.XP_009790037.1	1.2e-113	416.8
augustus_masked-VaccDscaff2-processed-gene-386.8-mRNA-1	3988.XP_002518343.1	2.9e-124	451.8	Methylmalonate-semialdehyde dehydrogenase
maker-VaccDscaff2-snap-gene-388.47-mRNA-1	4096.XP_009794260.1	1.6e-32	145.2	Legume lectin domain
maker-VaccDscaff2-augustus-gene-396.41-mRNA-1	29730.Gorai.005G263100.1	2.2e-44	186.8	Agamous-like MADS-box protein
snap_masked-VaccDscaff2-processed-gene-402.18-mRNA-1	4533.OB03G17660.1	9.2e-18	95.9	Glycosyl hydrolase family 10
maker-VaccDscaff2-augustus-gene-404.33-mRNA-1	4432.XP_010271744.1	1.9e-193	681.8	3-oxo-Delta(4,5)-steroid 5-beta-reductase-like
maker-VaccDscaff2-augustus-gene-407.36-mRNA-1	3880.AES95941	3.8e-200	704.9	Alcohol dehydrogenase GroES-like domain
maker-VaccDscaff2-snap-gene-419.24-mRNA-1	3760.EMJ27390	2.8e-38	167.9	Plant mobile domain
snap_masked-VaccDscaff2-processed-gene-428.11-mRNA-1	29760.VIT_03s0038g04490.t01	1.5e-40	173.3	Diaminopimelate decarboxylase
augustus_masked-VaccDscaff2-processed-gene-433.1-mRNA-1	3694.POPTR_0009s12690.1	2.6e-224	784.6	Endoglucanase
maker-VaccDscaff2-augustus-gene-443.28-mRNA-1	3983.cassava4.1_015362m	1.4e-47	196.4	Coiled-coil domain-containing protein
maker-VaccDscaff2-augustus-gene-445.22-mRNA-1	102107.XP_008235954.1	1.9e-98	366.7	Ubiquitin domain-containing protein
maker-VaccDscaff2-snap-gene-446.32-mRNA-1	3760.EMJ02285	1.8e-156	558.9	protein phosphatase 2C 27
augustus_masked-VaccDscaff301-processed-gene-0.6-mRNA-1	102107.XP_008218991.1	1.9e-29	135.6	Chaperone protein DNAj
maker-VaccDscaff26-augustus-gene-10.46-mRNA-1	3983.cassava4.1_013144m	8.6e-49	200.7	Acetyltransferase (GNAT) domain
snap_masked-VaccDscaff26-processed-gene-11.28-mRNA-1	4155.Migut.L01567.1.p	8.6e-115	420.2	Belongs to the peptidase C1 family
augustus_masked-VaccDscaff26-processed-gene-31.5-mRNA-1	4113.PGSC0003DMT400047636	1.7e-166	592.4	ATPase family associated with various cellular activities
maker-VaccDscaff26-augustus-gene-47.26-mRNA-1	4155.Migut.F00248.1.p	1.7e-270	938.7	Potassium transporter
snap_masked-VaccDscaff26-processed-gene-54.39-mRNA-1	225117.XP_009354047.1	9.1e-40	171.0	f-box protein
augustus_masked-VaccDscaff26-processed-gene-60.8-mRNA-1	3649.evm.model.supercontig_86.60	7.8e-28	130.2	Vacuolar-sorting receptor
snap_masked-VaccDscaff26-processed-gene-69.10-mRNA-1	3694.POPTR_0012s13870.1	2.4e-71	275.4	DNA-binding domain in plant proteins
snap_masked-VaccDscaff26-processed-gene-81.26-mRNA-1	3885.XP_007140310.1	8.3e-19	102.1	Encoded by
maker-VaccDscaff26-augustus-gene-84.30-mRNA-1	3694.POPTR_0003s10860.1	2.3e-27	128.6	Belongs to the small heat shock protein (HSP20) family
maker-VaccDscaff26-augustus-gene-88.24-mRNA-1	3827.XP_004499846.1	1.6e-40	173.7	Belongs to the 'GDSL' lipolytic enzyme family
augustus_masked-VaccDscaff26-processed-gene-93.4-mRNA-1	2711.XP_006490233.1	1.1e-79	303.9	F-box protein At5g07610-like
snap_masked-VaccDscaff26-processed-gene-95.15-mRNA-1	4096.XP_009765938.1	7.7e-76	290.4	Transcription factor
maker-VaccDscaff26-snap-gene-118.52-mRNA-1	4155.Migut.F00618.1.p	4e-246	857.8	Sodium/hydrogen exchanger family
maker-VaccDscaff26-snap-gene-127.31-mRNA-1	3694.POPTR_0008s06900.1	7.2e-296	1023.5	AAA domain (Cdc48 subfamily)
maker-VaccDscaff26-augustus-gene-140.21-mRNA-1	3983.cassava4.1_012146m	9.1e-167	592.8	Serine threonine-protein phosphatase
snap_masked-VaccDscaff26-processed-gene-145.25-mRNA-1	4432.XP_010256814.1	7.4e-36	156.4	Tropinone reductase homolog
augustus_masked-VaccDscaff26-processed-gene-185.11-mRNA-1	3641.EOY23100	2.9e-21	110.5	Plant mobile domain
maker-VaccDscaff26-snap-gene-189.40-mRNA-1	3988.XP_002516222.1	0.0	1328.5	Respiratory burst oxidase homolog protein
maker-VaccDscaff26-augustus-gene-195.30-mRNA-1	2711.XP_006485296.1	7.5e-201	708.4
maker-VaccDscaff26-snap-gene-198.22-mRNA-1	3641.EOY18908	1.2e-149	536.2	Phosphoglucan phosphatase DSP4
maker-VaccDscaff26-augustus-gene-201.37-mRNA-1	29760.VIT_13s0074g00160.t01	7.8e-139	500.0	Protein of unknown function (DUF455)
maker-VaccDscaff26-snap-gene-240.39-mRNA-1	4113.PGSC0003DMT400063876	7.1e-08	64.7	F-box family
maker-VaccDscaff26-augustus-gene-241.21-mRNA-1	29760.VIT_08s0007g04020.t01	5.2e-94	351.3	ahl1,atahl1
augustus_masked-VaccDscaff26-processed-gene-242.5-mRNA-1	4098.XP_009590884.1	2.5e-53	215.3	DNA-binding domain in plant proteins
maker-VaccDscaff26-snap-gene-259.27-mRNA-1	4432.XP_010260126.1	3.1e-14	84.7	Nucleolar protein
maker-VaccDscaff26-snap-gene-261.13-mRNA-1	29760.VIT_08s0007g02810.t01	1.5e-58	233.4	B3 domain-containing protein
maker-VaccDscaff26-augustus-gene-280.38-mRNA-1	4098.XP_009615891.1	3.9e-88	331.3	S-adenosyl-L-methionine-dependent lysine N- methyltransferase
snap_masked-VaccDscaff26-processed-gene-283.12-mRNA-1	3656.XP_008464966.1	4.8e-29	134.0	Glycosyltransferase
snap_masked-VaccDscaff26-processed-gene-291.10-mRNA-1	4006.Lus10019481	6.1e-28	132.5	zinc finger CCCH domain-containing protein
augustus_masked-VaccDscaff26-processed-gene-297.5-mRNA-1	3656.XP_008458016.1	3.1e-42	178.7	inactive receptor kinase
maker-VaccDscaff26-augustus-gene-300.29-mRNA-1	3988.XP_002516653.1	1.8e-141	509.2	TRAFAC class TrmE-Era-EngA-EngB-Septin- like GTPase
snap_masked-VaccDscaff26-processed-gene-315.8-mRNA-1	3641.EOY08818	1.1e-288	998.8	CDPK-related kinase
maker-VaccDscaff26-snap-gene-329.27-mRNA-1	29760.VIT_00s0252g00010.t01	1.1e-140	506.5	Belongs to the RecA family
augustus_masked-VaccDscaff26-processed-gene-331.3-mRNA-1	3641.EOY25249	6.3e-17	93.6	Domain of unknown function (DUF4220)
maker-VaccDscaff26-snap-gene-332.37-mRNA-1	3983.cassava4.1_005480m	7.1e-244	849.7	Class-II pyridine nucleotide-disulfide oxidoreductase
maker-VaccDscaff26-snap-gene-334.35-mRNA-1	29760.VIT_15s0046g00300.t01	0.0	1540.4	Exportin-2
maker-VaccDscaff26-augustus-gene-342.17-mRNA-1	29760.VIT_08s0007g07750.t01	1.3e-150	539.7	Polygalacturonase
maker-VaccDscaff26-snap-gene-352.47-mRNA-1	4432.XP_010257462.1	2e-96	360.1	Bromodomain-containing protein
snap_masked-VaccDscaff26-processed-gene-355.17-mRNA-1	4098.XP_009587839.1	2e-38	165.6	RNA-directed DNA methylation 1
maker-VaccDscaff26-augustus-gene-356.24-mRNA-1	3712.Bo3g035920.1	1.6e-06	60.8	WRC
maker-VaccDscaff26-augustus-gene-359.36-mRNA-1	29760.VIT_13s0067g03700.t01	2.6e-215	755.0	synthase
maker-VaccDscaff26-snap-gene-359.42-mRNA-1	29760.VIT_13s0067g03700.t01	2.3e-224	785.4	synthase
maker-VaccDscaff46-snap-gene-4.31-mRNA-1	3885.XP_007158463.1	2.5e-209	734.9	Cytochrome p450
maker-VaccDscaff46-augustus-gene-10.20-mRNA-1	3983.cassava4.1_012617m	1.2e-155	555.8	rhamnose biosynthetic enzyme
augustus_masked-VaccDscaff46-processed-gene-12.7-mRNA-1	29760.VIT_02s0025g04900.t01	1.3e-302	1046.6
snap_masked-VaccDscaff46-processed-gene-34.15-mRNA-1	3983.cassava4.1_022860m	1.5e-07	63.2
maker-VaccDscaff46-augustus-gene-37.23-mRNA-1	4081.Solyc08g078250.2.1	3.2e-142	511.5	Palmitoyl protein thioesterase
maker-VaccDscaff46-snap-gene-40.31-mRNA-1	981085.XP_010104820.1	4.5e-36	159.1
augustus_masked-VaccDscaff46-processed-gene-41.3-mRNA-1	3641.EOY04076	3.7e-38	167.5	Plant mobile domain
maker-VaccDscaff46-snap-gene-42.44-mRNA-1	4432.XP_010244060.1	7.3e-218	764.2	serine threonine-protein kinase cdc7
snap_masked-VaccDscaff46-processed-gene-64.6-mRNA-1	29760.VIT_02s0012g01940.t01	3.1e-28	131.3	transcription factor
maker-VaccDscaff46-snap-gene-69.22-mRNA-1	4098.XP_009605160.1	6.8e-64	251.5	Bulb-type mannose-specific lectin
augustus_masked-VaccDscaff46-processed-gene-74.9-mRNA-1	3641.EOY23100	1.4e-12	81.6	Plant mobile domain
maker-VaccDscaff46-augustus-gene-83.33-mRNA-1	2711.XP_006482404.1	4.9e-138	497.7	Protein kinase domain
snap_masked-VaccDscaff46-processed-gene-92.14-mRNA-1	102107.XP_008218787.1	1.4e-07	63.2	Belongs to the small GTPase superfamily. Arf family
augustus_masked-VaccDscaff46-processed-gene-95.3-mRNA-1	4098.XP_009598671.1	7.4e-160	570.5	Methyltransferase domain
maker-VaccDscaff46-augustus-gene-98.34-mRNA-1	29760.VIT_06s0004g03280.t01	5.1e-85	320.5	Broad-specificity nucleoside monophosphate (NMP) kinase
maker-VaccDscaff46-augustus-gene-98.33-mRNA-1	3750.XP_008358302.1	3.5e-129	468.4	exonuclease V
augustus_masked-VaccDscaff46-processed-gene-105.12-mRNA-1	4096.XP_009775190.1	8.3e-18	98.2
maker-VaccDscaff46-snap-gene-115.27-mRNA-1	4432.XP_010248008.1	1.4e-43	183.3	Replication factor C subunit
maker-VaccDscaff46-augustus-gene-115.24-mRNA-1	225117.XP_009368358.1	0.0	1761.5	serine threonine-protein phosphatase
maker-VaccDscaff46-augustus-gene-123.20-mRNA-1	29760.VIT_00s1216g00020.t01	5.7e-48	198.4	cytochrome P450
maker-VaccDscaff46-augustus-gene-124.34-mRNA-1	218851.Aquca_027_00184.1	1.9e-112	412.5	Belongs to the glycosyl hydrolase 18 family
maker-VaccDscaff46-augustus-gene-125.30-mRNA-1	4096.XP_009777867.1	7.3e-22	111.7	Myb/SANT-like DNA-binding domain
augustus_masked-VaccDscaff46-processed-gene-127.14-mRNA-1	4432.XP_010275010.1	5.3e-17	95.5
augustus_masked-VaccDscaff46-processed-gene-128.7-mRNA-1	4432.XP_010275010.1	2.2e-15	90.1
augustus_masked-VaccDscaff46-processed-gene-138.0-mRNA-1	3988.XP_002520526.1	3.4e-243	847.8	L-type lectin-domain containing receptor kinase
maker-VaccDscaff46-snap-gene-143.28-mRNA-1	3983.cassava4.1_004761m	3.5e-262	910.6	Lignin degradation and detoxification of lignin-derived products
augustus_masked-VaccDscaff46-processed-gene-145.4-mRNA-1	3659.XP_004136798.1	3.3e-28	131.7	Pentatricopeptide repeat-containing protein At1g61870
maker-VaccDscaff46-augustus-gene-155.32-mRNA-1	3641.EOX93679	7.5e-181	640.2	Acyl-coenzyme A thioesterase 9
maker-VaccDscaff46-augustus-gene-157.34-mRNA-1	3694.POPTR_0002s25200.1	4.9e-78	297.7
maker-VaccDscaff46-augustus-gene-159.22-mRNA-1	3694.POPTR_0002s24990.1	1.3e-106	393.7	transcription factor
maker-VaccDscaff46-augustus-gene-161.26-mRNA-1	3694.POPTR_0013s00420.1	1.6e-60	240.0	protease
maker-VaccDscaff46-augustus-gene-168.33-mRNA-1	4098.XP_009614586.1	3.9e-248	864.0	Pre-mRNA splicing Prp18-interacting factor
snap_masked-VaccDscaff46-processed-gene-177.11-mRNA-1	29760.VIT_05s0020g04680.t01	2.2e-43	181.8	Aux IAA proteins are short-lived transcriptional factors
maker-VaccDscaff46-augustus-gene-182.25-mRNA-1	29760.VIT_07s0151g00310.t01	1e-265	922.5	serine threonine-protein kinase
maker-VaccDscaff46-snap-gene-183.43-mRNA-1	4098.XP_009588684.1	2.8e-79	301.6	Ribosomal protein S13/S18
snap_masked-VaccDscaff46-processed-gene-199.15-mRNA-1	85681.XP_006444317.1	9.4e-139	500.0	Phytochrome A-associated F-box
augustus_masked-VaccDscaff519-processed-gene-0.4-mRNA-1	3641.EOY23100	7.6e-23	116.3	Plant mobile domain
augustus_masked-VaccDscaff5-processed-gene-3.7-mRNA-1	2711.XP_006488740.1	1.2e-165	589.3	sugar phosphate phosphate translocator
augustus_masked-VaccDscaff5-processed-gene-6.6-mRNA-1	29760.VIT_05s0020g00400.t01	1.6e-264	918.7	Beta-13-galactosyltransferase
maker-VaccDscaff5-snap-gene-15.48-mRNA-1	29760.VIT_05s0077g01000.t01	2.1e-107	397.5	Fip1 motif
maker-VaccDscaff5-augustus-gene-15.47-mRNA-1	3694.POPTR_0010s15480.1	2.7e-131	475.3	FR47-like protein
maker-VaccDscaff5-augustus-gene-18.35-mRNA-1	3694.POPTR_0010s00290.1	4.4e-88	331.6	Protein of unknown function (DUF789)
augustus_masked-VaccDscaff5-processed-gene-23.11-mRNA-1	29760.VIT_05s0077g02050.t01	8e-22	110.2	gamete expressed
maker-VaccDscaff5-augustus-gene-24.11-mRNA-1	29760.VIT_05s0077g02090.t01	1e-212	746.1	Belongs to the multi antimicrobial extrusion (MATE)
maker-VaccDscaff5-snap-gene-30.32-mRNA-1	29760.VIT_05s0020g01360.t01	2.2e-196	693.0	BEST Arabidopsis thaliana protein match is
snap_masked-VaccDscaff5-processed-gene-31.16-mRNA-1	29760.VIT_05s0020g02400.t01	6.2e-110	404.1	F-box LRR-repeat protein
maker-VaccDscaff5-augustus-gene-36.27-mRNA-1	4096.XP_009784375.1	2e-88	332.4	Dienelactone hydrolase family
maker-VaccDscaff5-snap-gene-41.48-mRNA-1	218851.Aquca_017_00327.1	1.4e-104	386.3	Removal of H(2)O(2), oxidation of toxic reductants
augustus_masked-VaccDscaff5-processed-gene-41.10-mRNA-1	3885.XP_007140535.1	6.1e-20	105.9
maker-VaccDscaff5-augustus-gene-49.23-mRNA-1	4096.XP_009763085.1	4.4e-268	931.8	zinc ion binding protein
snap_masked-VaccDscaff5-processed-gene-52.15-mRNA-1	4081.Solyc01g080130.2.1	1e-233	816.2
maker-VaccDscaff5-augustus-gene-55.26-mRNA-1	4096.XP_009763870.1	0.0	1420.2	Plant lipoxygenase
snap_masked-VaccDscaff5-processed-gene-64.15-mRNA-1	29730.Gorai.013G065800.1	7.7e-08	63.2	Encoded by
augustus_masked-VaccDscaff5-processed-gene-64.5-mRNA-1	4096.XP_009784387.1	9.9e-30	136.7	Preprotein translocase subunit
maker-VaccDscaff5-snap-gene-69.41-mRNA-1	2711.XP_006494494.1	3.9e-29	135.6	F-box protein
maker-VaccDscaff5-snap-gene-73.26-mRNA-1	3694.POPTR_0017s08480.1	1.5e-17	96.7	F-box kelch-repeat protein
maker-VaccDscaff5-snap-gene-74.37-mRNA-1	3760.EMJ21674	1.7e-14	86.3	21 kDa protein-like
maker-VaccDscaff5-snap-gene-118.33-mRNA-1	3694.POPTR_0014s10510.1	4e-217	761.1	transcription factor
maker-VaccDscaff5-augustus-gene-126.32-mRNA-1	102107.XP_008224167.1	1.5e-63	249.2	eukaryotic translation initiation factor
maker-VaccDscaff5-snap-gene-137.21-mRNA-1	4098.XP_009602210.1	5.5e-209	733.8	Major Facilitator Superfamily
maker-VaccDscaff5-snap-gene-139.27-mRNA-1	4555.Si031695m	3.7e-33	147.9	Tim10/DDP family zinc finger
maker-VaccDscaff5-snap-gene-139.30-mRNA-1	4098.XP_009618316.1	3e-72	279.3	Pentatricopeptide repeat domain
augustus_masked-VaccDscaff5-processed-gene-139.5-mRNA-1	4098.XP_009618316.1	2.9e-100	371.7	Pentatricopeptide repeat domain
augustus_masked-VaccDscaff5-processed-gene-144.4-mRNA-1	29760.VIT_08s0007g00880.t01	4.3e-43	181.8	Transcriptional regulator
maker-VaccDscaff5-augustus-gene-152.9-mRNA-1	29760.VIT_08s0007g00320.t01	2.3e-140	506.5	Protein of unknown function (DUF3741)
maker-VaccDscaff5-augustus-gene-157.27-mRNA-1	29760.VIT_08s0040g03330.t01	5.4e-43	180.6	Glycine-rich RNA-binding protein
maker-VaccDscaff5-snap-gene-160.29-mRNA-1	29760.VIT_08s0040g02870.t01	4.8e-56	224.2	Putative zinc- or iron-chelating domain
augustus_masked-VaccDscaff5-processed-gene-162.8-mRNA-1	3641.EOY23100	2.3e-26	128.3	Plant mobile domain
maker-VaccDscaff5-augustus-gene-163.18-mRNA-1	4098.XP_009602543.1	1.2e-52	213.8	AhpC/TSA antioxidant enzyme
snap_masked-VaccDscaff5-processed-gene-167.11-mRNA-1	3847.GLYMA13G20060.1	7.8e-45	186.4	Mitochondrial import inner membrane translocase subunit
maker-VaccDscaff5-augustus-gene-172.26-mRNA-1	102107.XP_008243930.1	3.8e-116	424.9	E3 ubiquitin-protein ligase
maker-VaccDscaff5-snap-gene-181.21-mRNA-1	4537.OPUNC12G00900.1	8.5e-51	207.2	Plant non-specific lipid-transfer proteins
augustus_masked-VaccDscaff5-processed-gene-181.7-mRNA-1	3760.EMJ27390	2.8e-33	151.0	Plant mobile domain
augustus_masked-VaccDscaff5-processed-gene-185.6-mRNA-1	225117.XP_009373129.1	8e-199	699.9	Non-specific serine threonine protein kinase
maker-VaccDscaff5-snap-gene-187.38-mRNA-1	29760.VIT_04s0044g01190.t01	6e-100	371.7	Spinocerebellar ataxia type 10 protein domain
maker-VaccDscaff5-augustus-gene-189.18-mRNA-1	29760.VIT_08s0058g00700.t01	1.2e-174	620.2	F-box LRR-repeat protein
augustus_masked-VaccDscaff5-processed-gene-194.3-mRNA-1	3641.EOY23100	2.1e-20	107.1	Plant mobile domain
augustus_masked-VaccDscaff5-processed-gene-196.6-mRNA-1	3694.POPTR_0015s04650.1	1.5e-216	758.8	The class-I pyridine nucleotide-disulfide oxidoreductase
maker-VaccDscaff5-augustus-gene-210.17-mRNA-1	4155.Migut.J00712.1.p	3.5e-69	268.1	Late embryogenesis abundant protein
maker-VaccDscaff5-augustus-gene-211.12-mRNA-1	29760.VIT_08s0007g02130.t01	3.9e-290	1003.8	phosphoprotein phosphatase activity
augustus_masked-VaccDscaff5-processed-gene-235.0-mRNA-1	29760.VIT_08s0040g01670.t01	9.1e-45	186.0	Indole-3-acetic acid-induced protein
snap_masked-VaccDscaff5-processed-gene-243.7-mRNA-1	3988.XP_002514665.1	1.6e-46	192.6	Belongs to the cytochrome P450 family
maker-VaccDscaff5-augustus-gene-251.18-mRNA-1	85681.XP_006430523.1	1.2e-133	483.4	mediator of RNA polymerase II transcription subunit
augustus_masked-VaccDscaff5-processed-gene-261.6-mRNA-1	225117.XP_009356034.1	5.5e-21	107.8	Domain of unknown function (DUF4539)
maker-VaccDscaff5-augustus-gene-284.33-mRNA-1	4432.XP_010248743.1	6.8e-61	241.1	Belongs to the profilin family
maker-VaccDscaff5-snap-gene-297.56-mRNA-1	71139.XP_010045071.1	1.9e-147	529.6	Belongs to the UDP-glycosyltransferase family
maker-VaccDscaff5-augustus-gene-298.28-mRNA-1	2711.XP_006481379.1	2.3e-143	515.8	Belongs to the UDP-glycosyltransferase family
maker-VaccDscaff5-snap-gene-304.35-mRNA-1	4536.ONIVA05G23040.1	1.9e-32	146.4	Protein kinase domain
maker-VaccDscaff5-augustus-gene-306.29-mRNA-1	71139.XP_010060705.1	5.3e-61	240.4	Multiprotein-bridging factor
augustus_masked-VaccDscaff5-processed-gene-311.7-mRNA-1	4098.XP_009629313.1	1.2e-124	454.5
maker-VaccDscaff5-augustus-gene-317.18-mRNA-1	71139.XP_010044659.1	1.4e-12	78.6	Cysteine-rich and transmembrane domain-containing protein
maker-VaccDscaff5-snap-gene-318.22-mRNA-1	4155.Migut.M00158.1.p	2.4e-186	658.3	Aminotransferase class I and II
snap_masked-VaccDscaff5-processed-gene-321.11-mRNA-1	3760.EMJ00101	2.9e-83	315.5	Pentatricopeptide repeat-containing protein At2g20710
augustus_masked-VaccDscaff5-processed-gene-331.11-mRNA-1	3641.EOX96475	8.3e-142	510.4	Phospholipase A(1) DAD1
maker-VaccDscaff5-snap-gene-340.23-mRNA-1	71139.XP_010035573.1	7.3e-114	417.2	Belongs to the peroxidase family
maker-VaccDscaff5-snap-gene-342.31-mRNA-1	2711.XP_006469695.1	3.3e-149	535.0	homeobox-leucine zipper protein
maker-VaccDscaff5-augustus-gene-345.30-mRNA-1	2711.XP_006464971.1	7e-91	342.0	Disease resistance protein
maker-VaccDscaff5-snap-gene-350.44-mRNA-1	3750.XP_008379654.1	1.4e-121	442.2	BAH and coiled-coil domain-containing protein
maker-VaccDscaff5-snap-gene-351.31-mRNA-1	2711.XP_006469613.1	1.4e-199	703.0
maker-VaccDscaff5-augustus-gene-355.34-mRNA-1	102107.XP_008229836.1	1.9e-234	818.5	Transcription initiation factor TFIID subunit
snap_masked-VaccDscaff5-processed-gene-375.18-mRNA-1	4113.PGSC0003DMT400071105	2.7e-14	84.7	VQ motif
augustus_masked-VaccDscaff5-processed-gene-388.6-mRNA-1	4432.XP_010242152.1	1.8e-14	85.1
snap_masked-VaccDscaff5-processed-gene-398.25-mRNA-1	4081.Solyc06g082800.2.1	2.7e-17	95.5	Eukaryotic porin
maker-VaccDscaff5-snap-gene-399.29-mRNA-1	225117.XP_009362951.1	0.0	1201.8	Pentatricopeptide repeat-containing protein
maker-VaccDscaff5-augustus-gene-416.38-mRNA-1	3847.GLYMA02G46670.1	1.3e-144	519.2	Serine threonine-protein kinase
augustus_masked-VaccDscaff5-processed-gene-423.6-mRNA-1	3885.XP_007147333.1	5.5e-15	87.0	Lecithin retinol acyltransferase
augustus_masked-VaccDscaff17-processed-gene-0.5-mRNA-1	3641.EOY04379	1.2e-61	243.0	calcium-binding protein
maker-VaccDscaff17-augustus-gene-9.23-mRNA-1	29760.VIT_14s0030g02300.t01	0.0	2499.5	mediator of RNA polymerase II transcription subunit
maker-VaccDscaff17-augustus-gene-11.18-mRNA-1	3750.XP_008370240.1	3.4e-132	478.0	Belongs to the peroxidase family
snap_masked-VaccDscaff17-processed-gene-17.13-mRNA-1	4155.Migut.J00241.1.p	2.3e-103	382.5	Legume lectin domain
maker-VaccDscaff17-augustus-gene-25.34-mRNA-1	3760.EMJ02163	8.2e-13	79.7	Pentatricopeptide repeat-containing protein
augustus_masked-VaccDscaff17-processed-gene-30.2-mRNA-1	3760.EMJ25445	9.1e-21	107.8	Plant mobile domain
maker-VaccDscaff17-snap-gene-47.29-mRNA-1	29760.VIT_06s0004g04340.t01	1.8e-48	200.3	THO complex subunit
snap_masked-VaccDscaff17-processed-gene-47.16-mRNA-1	3847.GLYMA12G07010.2	4.5e-20	105.9	THO complex subunit
snap_masked-VaccDscaff17-processed-gene-65.20-mRNA-1	981085.XP_010089954.1	2.7e-36	161.4	CHD3-type chromatin-remodeling factor
maker-VaccDscaff17-augustus-gene-69.41-mRNA-1	2711.XP_006481087.1	0.0	1474.1	ETO1-like protein 1
maker-VaccDscaff17-snap-gene-74.38-mRNA-1	3656.XP_008442393.1	4.1e-196	690.6	Proliferation-associated protein
maker-VaccDscaff17-snap-gene-76.34-mRNA-1	29760.VIT_08s0105g00330.t01	0.0	1406.7	isoform X1
maker-VaccDscaff17-augustus-gene-80.31-mRNA-1	4081.Solyc09g014520.2.1	8.5e-146	523.1	The light-harvesting complex (LHC) functions
maker-VaccDscaff17-snap-gene-93.32-mRNA-1	3983.cassava4.1_011664m	3.5e-131	475.3	Ubiquitin carboxyl-terminal hydrolase
maker-VaccDscaff17-augustus-gene-106.22-mRNA-1	4098.XP_009611860.1	1.1e-276	958.7	EF-hand domain pair
maker-VaccDscaff17-augustus-gene-108.23-mRNA-1	3750.XP_008375654.1	2e-240	839.3	TMV resistance protein N-like
maker-VaccDscaff17-snap-gene-117.34-mRNA-1	4155.Migut.N01080.1.p	7.1e-242	843.6	Class-II DAHP synthetase family
maker-VaccDscaff17-augustus-gene-122.31-mRNA-1	3641.EOY29228	0.0	1558.9	intracellular protein transport
maker-VaccDscaff17-augustus-gene-136.29-mRNA-1	981085.XP_010087924.1	7.2e-301	1039.3	MACPF domain-containing protein
snap_masked-VaccDscaff17-processed-gene-138.14-mRNA-1	4081.Solyc02g072470.2.1	3.5e-128	466.1	LRR receptor-like serine threonine-protein kinase At3g47570
maker-VaccDscaff17-augustus-gene-149.19-mRNA-1	3694.POPTR_0003s03690.1	3.2e-75	288.5	Leucine-rich repeat receptor-like protein kinase
maker-VaccDscaff17-snap-gene-167.18-mRNA-1	29760.VIT_14s0060g01160.t01	0.0	1312.4	isoform X1
augustus_masked-VaccDscaff17-processed-gene-201.4-mRNA-1	4432.XP_010275010.1	9.1e-17	94.7
augustus_masked-VaccDscaff17-processed-gene-207.2-mRNA-1	225117.XP_009362951.1	0.0	1197.2	Pentatricopeptide repeat-containing protein
augustus_masked-VaccDscaff17-processed-gene-227.1-mRNA-1	4113.PGSC0003DMT400066165	3.6e-24	117.9	LOB domain-containing protein
maker-VaccDscaff17-augustus-gene-228.30-mRNA-1	3641.EOX98443	6.8e-59	233.8	histone deacetylase
maker-VaccDscaff17-snap-gene-228.37-mRNA-1	4081.Solyc03g116910.2.1	9.2e-86	323.9	Cinnamoyl-CoA reductase
maker-VaccDscaff17-augustus-gene-228.35-mRNA-1	3641.EOX92006	0.0	2288.1	protein At4g01020, chloroplastic
augustus_masked-VaccDscaff17-processed-gene-228.3-mRNA-1	3760.EMJ27390	2.8e-22	114.4	Plant mobile domain
maker-VaccDscaff17-augustus-gene-235.23-mRNA-1	981085.XP_010107916.1	1.5e-129	469.2	caffeoyl-CoA O-methyltransferase
maker-VaccDscaff17-snap-gene-251.31-mRNA-1	3760.EMJ11350	8.9e-61	240.7	HPP family
snap_masked-VaccDscaff17-processed-gene-255.23-mRNA-1	3983.cassava4.1_003101m	1.4e-233	815.8	beta-1,3-galactosyltransferase 19
maker-VaccDscaff17-snap-gene-257.43-mRNA-1	29760.VIT_17s0000g07490.t01	8.6e-71	275.0
maker-VaccDscaff17-augustus-gene-263.29-mRNA-1	2711.XP_006494673.1	8.1e-50	205.7	ankyrin repeat-containing protein
maker-VaccDscaff17-augustus-gene-264.31-mRNA-1	3983.cassava4.1_028521m	7.2e-24	117.5	Belongs to the 'GDSL' lipolytic enzyme family
augustus_masked-VaccDscaff17-processed-gene-266.5-mRNA-1	3641.EOY20614	5.1e-190	671.0	calmodulin binding protein
maker-VaccDscaff17-snap-gene-271.50-mRNA-1	981085.XP_010102642.1	1e-06	60.1	proteasome complex subunit
augustus_masked-VaccDscaff17-processed-gene-272.6-mRNA-1	4098.XP_009619550.1	3.9e-28	132.1	Glutamine amidotransferase class-I
augustus_masked-VaccDscaff17-processed-gene-273.3-mRNA-1	3760.EMJ27390	1.3e-37	165.6	Plant mobile domain
maker-VaccDscaff17-snap-gene-274.35-mRNA-1	3641.EOY20687	6.6e-35	154.5	transcription factor
maker-VaccDscaff17-snap-gene-289.43-mRNA-1	4096.XP_009794139.1	2.2e-117	429.5	synthase
maker-VaccDscaff17-snap-gene-292.35-mRNA-1	4006.Lus10018081	4.2e-270	937.6	Autophagy protein 16 (ATG16)
maker-VaccDscaff17-augustus-gene-292.23-mRNA-1	29760.VIT_17s0000g09700.t01	2.1e-275	954.9	Protein SIEVE ELEMENT OCCLUSION
maker-VaccDscaff17-augustus-gene-297.34-mRNA-1	3694.POPTR_0015s10290.1	4.7e-158	564.3	AarF domain-containing protein kinase
snap_masked-VaccDscaff17-processed-gene-305.10-mRNA-1	3641.EOY04840	7.3e-87	326.6	acetolactate synthase
snap_masked-VaccDscaff17-processed-gene-305.11-mRNA-1	4096.XP_009769695.1	8.5e-144	516.5	acetolactate synthase
maker-VaccDscaff17-augustus-gene-311.29-mRNA-1	4081.Solyc06g072620.2.1	2.6e-83	315.5	Mediates both low-affinity uptake and efflux of sugar
maker-VaccDscaff17-snap-gene-314.39-mRNA-1	29760.VIT_17s0000g00320.t01	0.0	1100.9	Auxin response factors (ARFs) are transcriptional factors
maker-VaccDscaff17-snap-gene-327.33-mRNA-1	71139.XP_010034028.1	6.2e-18	97.1	Metal transporter
augustus_masked-VaccDscaff17-processed-gene-330.5-mRNA-1	29760.VIT_09s0018g01330.t01	8.6e-58	230.7	fasciclin-like arabinogalactan protein
maker-VaccDscaff17-augustus-gene-333.40-mRNA-1	71139.XP_010048338.1	7.3e-36	157.9	Myb/SANT-like DNA-binding domain
maker-VaccDscaff17-augustus-gene-341.50-mRNA-1	3988.XP_002517625.1	0.0	1496.1	Hydrolyzes glycerol-phospholipids
maker-VaccDscaff17-snap-gene-355.44-mRNA-1	29760.VIT_09s0002g04000.t01	0.0	1333.5	Zinc phosphodiesterase ELAC protein
maker-VaccDscaff17-augustus-gene-359.25-mRNA-1	3983.cassava4.1_033702m	2.3e-239	834.7	6-phosphofructokinase 6-like
maker-VaccDscaff17-snap-gene-381.47-mRNA-1	4081.Solyc07g056380.1.1	8.4e-12	77.0	Ribonuclease H protein
maker-VaccDscaff109-augustus-gene-1.25-mRNA-1	102107.XP_008218494.1	2e-102	379.4	phosphatidylinositol dephosphorylation
maker-VaccDscaff109-augustus-gene-4.23-mRNA-1	3694.POPTR_0011s07630.1	5.3e-36	157.5	Belongs to the TPP enzyme family
maker-VaccDscaff110-augustus-gene-0.27-mRNA-1	4155.Migut.C01161.1.p	7.4e-11	74.3
maker-VaccDscaff316-augustus-gene-0.33-mRNA-1	4096.XP_009796122.1	1.4e-63	248.8	Binds to actin and affects the structure of the cytoskeleton
maker-VaccDscaff166-augustus-gene-2.40-mRNA-1	29760.VIT_19s0027g01670.t01	1.5e-32	146.4	Belongs to the cyclin family
maker-VaccDscaff99-snap-gene-3.34-mRNA-1	3649.evm.model.supercontig_115.64	0.0	1565.4	Magnesium-dependent enzyme
maker-VaccDscaff18-augustus-gene-0.22-mRNA-1	29760.VIT_18s0001g10910.t01	1.1e-170	606.3	lipolytic acyl hydrolase (LAH)
augustus_masked-VaccDscaff18-processed-gene-11.0-mRNA-1	3988.XP_002528430.1	2.6e-29	134.8	RPAP1-like, N-terminal
snap_masked-VaccDscaff18-processed-gene-20.16-mRNA-1	3983.cassava4.1_026885m	9.9e-61	240.0	Dehydration-responsive element-binding protein
maker-VaccDscaff18-snap-gene-28.38-mRNA-1	2711.XP_006487725.1	1.8e-46	194.1	Encoded by
maker-VaccDscaff18-augustus-gene-28.24-mRNA-1	85681.XP_006434988.1	1.4e-69	269.6
maker-VaccDscaff18-snap-gene-33.42-mRNA-1	77586.LPERR09G13640.1	2.2e-103	382.9	Thaumatin family
maker-VaccDscaff18-augustus-gene-48.31-mRNA-1	4081.Solyc04g077130.1.1	1.6e-23	116.3	50S ribosomal protein 6
maker-VaccDscaff18-snap-gene-48.43-mRNA-1	4098.XP_009618750.1	4.8e-87	329.7	Poly (ADP-ribose) polymerase
augustus_masked-VaccDscaff18-processed-gene-65.8-mRNA-1	3760.EMJ26203	4.1e-70	271.9	Clathrin assembly protein
maker-VaccDscaff18-augustus-gene-70.33-mRNA-1	29760.VIT_18s0001g06330.t01	7.9e-124	449.9	Belongs to the 14-3-3 family
augustus_masked-VaccDscaff18-processed-gene-75.6-mRNA-1	29760.VIT_16s0050g02320.t01	1e-114	421.4	P-loop containing nucleoside triphosphate hydrolases
maker-VaccDscaff18-snap-gene-82.29-mRNA-1	3988.XP_002513881.1	0.0	3925.9	Acetyl-CoA Carboxylase
maker-VaccDscaff18-augustus-gene-93.22-mRNA-1	3983.cassava4.1_022374m	2.5e-134	485.3	Acetylajmalan esterase-like
augustus_masked-VaccDscaff18-processed-gene-107.4-mRNA-1	4098.XP_009631170.1	5e-96	358.2	E3 ubiquitin-protein ligase
maker-VaccDscaff18-snap-gene-135.18-mRNA-1	3659.XP_004144826.1	1.6e-11	75.1	Plant lipoxygenase
maker-VaccDscaff18-augustus-gene-136.19-mRNA-1	3847.GLYMA08G46900.1	1.4e-46	193.7	E3 ubiquitin-protein ligase
maker-VaccDscaff18-snap-gene-163.29-mRNA-1	3641.EOY29254	0.0	1192.2	Histidine kinase
maker-VaccDscaff18-snap-gene-167.33-mRNA-1	90675.XP_010451097.1	2.7e-199	701.4	protein phosphatase 2C 59
maker-VaccDscaff18-snap-gene-168.40-mRNA-1	2711.XP_006480137.1	2.2e-31	143.3	Armadillo repeat-containing protein
maker-VaccDscaff18-augustus-gene-170.34-mRNA-1	3641.EOY29228	0.0	1649.4	intracellular protein transport
augustus_masked-VaccDscaff18-processed-gene-177.3-mRNA-1	4113.PGSC0003DMT400068894	2e-104	386.0	Plant protein of unknown function (DUF868)
augustus_masked-VaccDscaff18-processed-gene-180.2-mRNA-1	3694.POPTR_0006s27550.1	2.7e-11	75.1
augustus_masked-VaccDscaff18-processed-gene-196.6-mRNA-1	29760.VIT_04s0008g04720.t01	4e-71	276.2	Endonuclease/Exonuclease/phosphatase family
maker-VaccDscaff18-augustus-gene-213.28-mRNA-1	4096.XP_009785688.1	7.8e-59	233.8	Belongs to the UDP-glycosyltransferase family
maker-VaccDscaff18-snap-gene-215.31-mRNA-1	3988.XP_002510683.1	7.6e-73	281.6	Glycosyl transferase family 2
maker-VaccDscaff18-augustus-gene-215.30-mRNA-1	2711.XP_006483558.1	7.2e-78	297.0	ribosomal protein
maker-VaccDscaff18-augustus-gene-219.24-mRNA-1	29760.VIT_04s0008g03880.t01	0.0	1355.5	intracellular protein transport
augustus_masked-VaccDscaff18-processed-gene-239.6-mRNA-1	3641.EOY23100	2.6e-26	127.5	Plant mobile domain
snap_masked-VaccDscaff18-processed-gene-250.15-mRNA-1	71139.XP_010061941.1	3e-153	548.5	xyloglucan galactosyltransferase
maker-VaccDscaff18-augustus-gene-255.27-mRNA-1	4113.PGSC0003DMT400058520	1.2e-105	389.8	D-isomer specific 2-hydroxyacid dehydrogenase family
augustus_masked-VaccDscaff18-processed-gene-265.3-mRNA-1	3760.EMJ25445	1.5e-30	140.6	Plant mobile domain
maker-VaccDscaff18-augustus-gene-270.16-mRNA-1	3649.evm.model.supercontig_129.26	6.6e-155	553.5	Dihydrouridine synthase (Dus)
maker-VaccDscaff18-augustus-gene-273.29-mRNA-1	3649.evm.model.supercontig_18.158	6.1e-33	148.3	alpha/beta hydrolase fold
maker-VaccDscaff18-snap-gene-273.36-mRNA-1	3750.XP_008343002.1	9.7e-31	139.4	carboxylesterase 8
maker-VaccDscaff18-snap-gene-292.29-mRNA-1	29760.VIT_14s0006g02620.t01	1.1e-150	539.7	Alpha beta hydrolase domain-containing protein
maker-VaccDscaff18-augustus-gene-303.42-mRNA-1	29760.VIT_14s0083g00300.t01	9.9e-122	443.4	Transmembrane protein 33 homolog
maker-VaccDscaff18-snap-gene-309.47-mRNA-1	4098.XP_009631792.1	8.6e-08	64.3	F-box associated domain
maker-VaccDscaff18-snap-gene-310.47-mRNA-1	3641.EOY13354	1.7e-110	406.0	Belongs to the sulfotransferase 1 family
augustus_masked-VaccDscaff18-processed-gene-319.1-mRNA-1	3880.AES92317	2.9e-49	203.4	protein heterodimerization activity
maker-VaccDscaff18-augustus-gene-323.24-mRNA-1	29760.VIT_14s0068g00450.t01	1.7e-190	672.2	Belongs to the UDP-glycosyltransferase family
maker-VaccDscaff18-augustus-gene-324.31-mRNA-1	3983.cassava4.1_026321m	1.1e-145	523.5	Targeting protein for Xklp2 (TPX2)
augustus_masked-VaccDscaff18-processed-gene-324.6-mRNA-1	57918.XP_004301250.1	3e-22	112.1	Domain of unknown function (DUF4539)
augustus_masked-VaccDscaff18-processed-gene-328.7-mRNA-1	102107.XP_008230830.1	2.5e-139	502.3	UDP-glucoronosyl and UDP-glucosyl transferase
augustus_masked-VaccDscaff18-processed-gene-335.0-mRNA-1	3641.EOY03571	1.4e-25	123.2	F-Box protein
maker-VaccDscaff18-augustus-gene-337.37-mRNA-1	3641.EOY03443	4.7e-144	517.7	(NAC) domain-containing protein
maker-VaccDscaff18-snap-gene-344.48-mRNA-1	29760.VIT_14s0108g00280.t01	1.9e-201	709.9	LRR receptor-like serine threonine-protein kinase
maker-VaccDscaff18-augustus-gene-353.32-mRNA-1	29730.Gorai.007G078300.1	2.1e-109	402.9	Belongs to the AAA ATPase family
maker-VaccDscaff18-augustus-gene-354.30-mRNA-1	3649.evm.model.supercontig_14.68	1.7e-23	116.3
maker-VaccDscaff18-augustus-gene-356.38-mRNA-1	2711.XP_006482489.1	2.1e-09	68.9	Gibberellin-regulated protein
augustus_masked-VaccDscaff18-processed-gene-357.2-mRNA-1	161934.XP_010676554.1	1.2e-66	260.0	Myb/SANT-like DNA-binding domain
maker-VaccDscaff18-augustus-gene-377.36-mRNA-1	3847.GLYMA19G07600.1	2.1e-50	205.3	Ubiquitin homologues
augustus_masked-VaccDscaff81-processed-gene-2.3-mRNA-1	71139.XP_010048929.1	1.3e-46	193.0	Heat shock protein 70 (HSP70)-interacting protein
augustus_masked-VaccDscaff81-processed-gene-5.0-mRNA-1	3750.XP_008372690.1	4.2e-127	461.8	UPF0481 protein
maker-VaccDscaff81-augustus-gene-6.36-mRNA-1	29730.Gorai.001G031700.1	4.3e-275	953.4	Belongs to the aldehyde dehydrogenase family
augustus_masked-VaccDscaff1307-processed-gene-0.0-mRNA-1	29760.VIT_19s0014g00930.t01	2.3e-33	149.4	Plant mobile domain
maker-VaccDscaff1307-snap-gene-0.10-mRNA-1	2711.XP_006475193.1	1.5e-38	166.0	Plant mobile domain
maker-VaccDscaff40-snap-gene-2.36-mRNA-1	29760.VIT_08s0056g00160.t01	1.3e-91	342.8	U3 small nucleolar RNA-associated protein 11
maker-VaccDscaff40-snap-gene-14.33-mRNA-1	4096.XP_009767828.1	1.4e-48	199.5	E3 ubiquitin-protein ligase CHIP-like
maker-VaccDscaff40-augustus-gene-24.15-mRNA-1	4155.Migut.N02711.1.p	2.5e-62	245.4	Protein DCL, chloroplastic
maker-VaccDscaff40-augustus-gene-25.27-mRNA-1	29760.VIT_14s0030g01680.t01	2.2e-90	338.6	MKI67 FHA domain-interacting nucleolar phosphoprotein-like
augustus_masked-VaccDscaff40-processed-gene-32.2-mRNA-1	29760.VIT_18s0001g09750.t01	6e-225	787.3	Receptor protein kinase
augustus_masked-VaccDscaff40-processed-gene-58.1-mRNA-1	3641.EOY15453	3.9e-235	820.8	argininosuccinate lyase
augustus_masked-VaccDscaff40-processed-gene-70.5-mRNA-1	3641.EOY04076	3.4e-38	167.5	Plant mobile domain
snap_masked-VaccDscaff40-processed-gene-75.20-mRNA-1	29730.Gorai.009G240000.1	6.6e-18	98.6	sulfate transporter
maker-VaccDscaff40-augustus-gene-95.16-mRNA-1	3988.XP_002513875.1	5.2e-21	106.7	Zinc finger CCCH domain-containing protein 15 homolog
augustus_masked-VaccDscaff40-processed-gene-99.3-mRNA-1	29730.Gorai.009G241300.1	2.1e-112	413.3	protein At4g37920, chloroplastic-like
augustus_masked-VaccDscaff40-processed-gene-104.7-mRNA-1	4098.XP_009623958.1	5.3e-17	95.5
maker-VaccDscaff40-snap-gene-114.54-mRNA-1	4155.Migut.F00618.1.p	8.4e-244	850.1	Sodium/hydrogen exchanger family
maker-VaccDscaff40-snap-gene-114.52-mRNA-1	3760.EMJ22003	3.5e-76	292.4	cation H( ) antiporter 15-like
augustus_masked-VaccDscaff40-processed-gene-138.5-mRNA-1	57918.XP_004301250.1	9.3e-21	107.1	Domain of unknown function (DUF4539)
augustus_masked-VaccDscaff40-processed-gene-143.1-mRNA-1	3641.EOY23100	1.4e-34	155.2	Plant mobile domain
snap_masked-VaccDscaff40-processed-gene-155.12-mRNA-1	29760.VIT_18s0001g15580.t01	3.8e-20	103.6	Glycosyl transferase family 8
augustus_masked-VaccDscaff40-processed-gene-162.3-mRNA-1	3641.EOY23100	1.3e-13	83.2	Plant mobile domain
augustus_masked-VaccDscaff40-processed-gene-167.3-mRNA-1	3988.XP_002509597.1	0.0	1097.4	Copper amine oxidase, N2 domain
maker-VaccDscaff40-augustus-gene-171.27-mRNA-1	3641.EOX96184	7e-182	643.3	synthase
maker-VaccDscaff40-augustus-gene-185.19-mRNA-1	3988.XP_002512065.1	4.2e-34	150.6	SPIRAL1-like
maker-VaccDscaff40-snap-gene-226.38-mRNA-1	29760.VIT_11s0016g03860.t01	2.8e-100	372.1	PP-loop family
maker-VaccDscaff40-augustus-gene-235.28-mRNA-1	29760.VIT_11s0016g04600.t01	1.6e-130	473.0	transcription factor
maker-VaccDscaff40-augustus-gene-239.29-mRNA-1	29760.VIT_11s0016g04810.t01	1.7e-245	855.1	Belongs to the cytochrome P450 family
augustus_masked-VaccDscaff40-processed-gene-239.3-mRNA-1	29760.VIT_11s0016g04760.t01	2.1e-29	135.2
maker-VaccDscaff40-augustus-gene-243.45-mRNA-1	3656.XP_008457690.1	1.1e-62	245.7	NHP2-like protein 1
maker-VaccDscaff40-augustus-gene-243.47-mRNA-1	29760.VIT_11s0016g05110.t01	1.2e-166	592.8	Belongs to the mitochondrial carrier (TC 2.A.29) family
maker-VaccDscaff40-snap-gene-251.28-mRNA-1	102107.XP_008242799.1	0.0	1830.1	WD repeat-containing protein
maker-VaccDscaff40-augustus-gene-260.32-mRNA-1	3983.cassava4.1_024150m	7.3e-23	114.8	F-box protein At5g07610-like
maker-VaccDscaff40-augustus-gene-269.31-mRNA-1	3983.cassava4.1_004825m	1.1e-234	819.3	Acyl-activating enzyme
maker-VaccDscaff40-snap-gene-276.20-mRNA-1	4113.PGSC0003DMT400046054	2.4e-143	515.4	Membrane transport protein
maker-VaccDscaff80-snap-gene-1.48-mRNA-1	3847.GLYMA14G01920.1	1.5e-71	276.6	DUF21 domain-containing protein
snap_masked-VaccDscaff80-processed-gene-2.14-mRNA-1	3750.XP_008366428.1	3.7e-249	867.8	glycerophosphoryl diester phosphodiesterase
maker-VaccDscaff80-augustus-gene-2.29-mRNA-1	3750.XP_008366427.1	6.8e-148	530.0	Belongs to the pirin family
augustus_masked-VaccDscaff80-processed-gene-3.11-mRNA-1	3694.POPTR_0002s21870.1	3.3e-74	284.3	Seems to be required for maximal rate of protein biosynthesis
maker-VaccDscaff80-augustus-gene-5.36-mRNA-1	2711.XP_006475020.1	1.5e-202	712.2	GDP-L-galactose phosphorylase
maker-VaccDscaff80-snap-gene-6.61-mRNA-1	37682.EMT06921	5.4e-178	632.1	Protein of unknown function (DUF563)
maker-VaccDscaff1225-augustus-gene-0.4-mRNA-1	29760.VIT_15s0021g02730.t01	0.0	1339.7	Protein transport protein sec16
maker-VaccDscaff150-snap-gene-2.65-mRNA-1	3694.POPTR_0012s03330.1	3.3e-115	421.8	Endonuclease I
maker-VaccDscaff41-augustus-gene-7.17-mRNA-1	4432.XP_010254544.1	1.7e-235	822.0	argininosuccinate lyase
maker-VaccDscaff41-augustus-gene-11.28-mRNA-1	42345.XP_008785322.1	4.7e-10	70.5	At5g65660-like
maker-VaccDscaff41-snap-gene-20.17-mRNA-1	3885.XP_007133626.1	1.2e-11	77.4	disease resistance
maker-VaccDscaff41-snap-gene-32.22-mRNA-1	77586.LPERR03G21280.1	0.0	1127.5	Natural resistance-associated macrophage protein
maker-VaccDscaff41-snap-gene-36.30-mRNA-1	29760.VIT_18s0001g09750.t01	2.6e-274	951.4	Receptor protein kinase
augustus_masked-VaccDscaff41-processed-gene-37.0-mRNA-1	29760.VIT_18s0001g09730.t01	1.2e-219	769.6	Receptor protein kinase
augustus_masked-VaccDscaff41-processed-gene-39.6-mRNA-1	3641.EOY23100	7.3e-38	166.4	Plant mobile domain
maker-VaccDscaff41-augustus-gene-47.26-mRNA-1	3750.XP_008367666.1	8.6e-63	246.9	Protein DCL, chloroplastic-like
maker-VaccDscaff41-snap-gene-62.29-mRNA-1	3983.cassava4.1_009039m	7.6e-208	729.6	Catalytic subunit of the queuine tRNA-ribosyltransferase
augustus_masked-VaccDscaff41-processed-gene-62.2-mRNA-1	2711.XP_006473518.1	7.1e-73	282.0
maker-VaccDscaff41-snap-gene-65.25-mRNA-1	29760.VIT_18s0001g06270.t01	0.0	1399.8	F-box protein
maker-VaccDscaff41-snap-gene-68.14-mRNA-1	29760.VIT_18s0001g06120.t01	6.5e-199	700.3	Belongs to the UDP-glycosyltransferase family
maker-VaccDscaff41-snap-gene-80.46-mRNA-1	85681.XP_006434028.1	2.7e-216	758.1	Belongs to the glycosyl hydrolase 5 (cellulase A) family
maker-VaccDscaff41-snap-gene-80.47-mRNA-1	29730.Gorai.009G239300.1	1.5e-102	379.4	Random slug protein 5-like
augustus_masked-VaccDscaff41-processed-gene-82.8-mRNA-1	2711.XP_006483727.1	3.9e-71	275.8	Belongs to the peptidase A1 family
maker-VaccDscaff41-augustus-gene-84.23-mRNA-1	3988.XP_002513875.1	1.4e-21	108.6	Zinc finger CCCH domain-containing protein 15 homolog
maker-VaccDscaff41-snap-gene-101.46-mRNA-1	4155.Migut.F00618.1.p	3.2e-243	848.2	Sodium/hydrogen exchanger family
maker-VaccDscaff41-snap-gene-101.42-mRNA-1	4155.Migut.F00618.1.p	2e-195	689.1	Sodium/hydrogen exchanger family
maker-VaccDscaff41-snap-gene-101.44-mRNA-1	4155.Migut.F00618.1.p	2.4e-35	155.2	Sodium/hydrogen exchanger family
augustus_masked-VaccDscaff41-processed-gene-131.11-mRNA-1	4155.Migut.B01490.1.p	2.1e-73	282.7	E3 ubiquitin-protein ligase
maker-VaccDscaff41-snap-gene-132.20-mRNA-1	3983.cassava4.1_016488m	2.5e-85	321.6	ATP synthase subunit delta'
augustus_masked-VaccDscaff41-processed-gene-156.3-mRNA-1	3988.XP_002509597.1	0.0	1099.0	Copper amine oxidase, N2 domain
maker-VaccDscaff41-snap-gene-172.41-mRNA-1	29760.VIT_15s0046g01790.t01	5.7e-154	551.2	AT-rich interactive domain-containing protein
maker-VaccDscaff41-augustus-gene-177.32-mRNA-1	4096.XP_009768968.1	3.3e-33	148.3	Water Stress and Hypersensitive response
maker-VaccDscaff41-snap-gene-179.25-mRNA-1	3649.evm.model.supercontig_1.65	0.0	1148.3	Guanine nucleotide exchange factor in Golgi
maker-VaccDscaff41-snap-gene-184.28-mRNA-1	4432.XP_010266472.1	9.1e-160	570.1	Rhodanese-like domain-containing protein 4 chloroplastic
snap_masked-VaccDscaff41-processed-gene-190.8-mRNA-1	29760.VIT_11s0103g00370.t01	1.8e-173	615.5	cadmium zinc-transporting ATPase
maker-VaccDscaff41-snap-gene-191.27-mRNA-1	29760.VIT_11s0103g00530.t01	4.4e-140	504.6	Belongs to the OSBP family
maker-VaccDscaff41-augustus-gene-203.20-mRNA-1	3641.EOY32256	3.7e-67	260.8	Belongs to the cytochrome P450 family
maker-VaccDscaff41-augustus-gene-219.27-mRNA-1	29760.VIT_11s0016g04600.t01	3.3e-128	465.3	transcription factor
maker-VaccDscaff41-augustus-gene-218.37-mRNA-1	2711.XP_006475759.1	2.3e-124	451.8	Transmembrane protein 19
maker-VaccDscaff41-augustus-gene-224.30-mRNA-1	29760.VIT_11s0016g04810.t01	8.5e-245	852.8	Belongs to the cytochrome P450 family
augustus_masked-VaccDscaff41-processed-gene-224.1-mRNA-1	29760.VIT_11s0016g04760.t01	1.5e-27	129.0
maker-VaccDscaff41-augustus-gene-228.32-mRNA-1	3656.XP_008457690.1	1.1e-62	245.7	NHP2-like protein 1
snap_masked-VaccDscaff41-processed-gene-233.14-mRNA-1	3827.XP_004508477.1	1.3e-30	139.8	Plastocyanin-like domain
snap_masked-VaccDscaff41-processed-gene-240.13-mRNA-1	4096.XP_009764432.1	6.7e-10	70.9	Pentatricopeptide repeat-containing protein
maker-VaccDscaff41-snap-gene-237.45-mRNA-1	3656.XP_008438195.1	4.7e-207	727.2	ThiF family
maker-VaccDscaff41-augustus-gene-262.37-mRNA-1	3641.EOX90698	1.7e-270	938.3	acyl-activating enzyme
maker-VaccDscaff700-snap-gene-0.19-mRNA-1	50452.A0A087G244	9.8e-70	270.8	Dirigent proteins impart stereoselectivity
augustus_masked-VaccDscaff14-processed-gene-0.3-mRNA-1	4098.XP_009601545.1	6.9e-58	231.5	F-box kelch-repeat protein
maker-VaccDscaff14-snap-gene-6.29-mRNA-1	3694.POPTR_0018s03410.1	9.4e-164	583.9	Belongs to the UDP-glycosyltransferase family
maker-VaccDscaff14-snap-gene-41.44-mRNA-1	57918.XP_004300204.1	1e-126	460.7	inactive poly ADP-ribose polymerase
augustus_masked-VaccDscaff14-processed-gene-45.2-mRNA-1	3760.EMJ27390	7.6e-36	159.8	Plant mobile domain
snap_masked-VaccDscaff14-processed-gene-51.13-mRNA-1	4432.XP_010269998.1	6e-77	294.3	Transcription factor that specifically binds AT-rich DNA
snap_masked-VaccDscaff14-processed-gene-51.11-mRNA-1	3983.cassava4.1_023237m	1.3e-37	163.3	transcriptional regulator
maker-VaccDscaff14-augustus-gene-53.19-mRNA-1	29760.VIT_02s0012g00550.t01	4.1e-233	814.3	phosphatidylinositol dephosphorylation
augustus_masked-VaccDscaff14-processed-gene-57.3-mRNA-1	3760.EMJ27390	9.5e-36	159.5	Plant mobile domain
maker-VaccDscaff14-snap-gene-61.19-mRNA-1	102107.XP_008225008.1	1.3e-124	453.0	Cysteine-rich receptor-like protein kinase
maker-VaccDscaff14-augustus-gene-75.33-mRNA-1	71139.XP_010023651.1	1.8e-262	911.4	Interconversion of serine and glycine
snap_masked-VaccDscaff14-processed-gene-75.12-mRNA-1	29760.VIT_02s0012g02060.t01	3.3e-42	177.6	calcium-binding protein
maker-VaccDscaff14-augustus-gene-79.29-mRNA-1	71139.XP_010023651.1	1.1e-256	892.1	Interconversion of serine and glycine
augustus_masked-VaccDscaff14-processed-gene-85.0-mRNA-1	4098.XP_009588262.1	7.8e-30	138.7	A Receptor for Ubiquitination Targets
maker-VaccDscaff14-augustus-gene-90.26-mRNA-1	3988.XP_002518040.1	7.7e-47	194.1	Filamin-type immunoglobulin domains
maker-VaccDscaff14-snap-gene-91.21-mRNA-1	29760.VIT_05s0029g00200.t01	2.1e-265	921.4	Purple acid phosphatase
augustus_masked-VaccDscaff14-processed-gene-102.12-mRNA-1	57918.XP_004287424.1	2.6e-20	107.5	MADS-box transcription factor
augustus_masked-VaccDscaff14-processed-gene-133.11-mRNA-1	3760.EMJ25445	7.8e-22	111.7	Plant mobile domain
maker-VaccDscaff14-snap-gene-136.32-mRNA-1	4096.XP_009758779.1	4.4e-165	587.8	Belongs to the peptidase A1 family
snap_masked-VaccDscaff14-processed-gene-138.12-mRNA-1	38727.Pavir.Db00390.1.p	1.3e-16	91.7	Peptidase family M20/M25/M40
augustus_masked-VaccDscaff14-processed-gene-142.2-mRNA-1	71139.XP_010025709.1	1e-126	460.3	Belongs to the peptidase A1 family
maker-VaccDscaff14-augustus-gene-143.22-mRNA-1	29760.VIT_18s0001g03180.t01	3.5e-125	454.9	WAT1-related protein
maker-VaccDscaff14-snap-gene-157.33-mRNA-1	3983.cassava4.1_023965m	5.7e-36	157.9	calcium-binding protein
maker-VaccDscaff14-snap-gene-184.28-mRNA-1	4096.XP_009760965.1	9.6e-21	105.9	Eukaryotic aspartyl protease
snap_masked-VaccDscaff14-processed-gene-191.9-mRNA-1	4113.PGSC0003DMT400079781	1.3e-21	109.4	Zinc knuckle
snap_masked-VaccDscaff14-processed-gene-204.9-mRNA-1	225117.XP_009372300.1	7e-32	143.3	signal peptidase complex subunit
maker-VaccDscaff14-augustus-gene-207.32-mRNA-1	3827.XP_004502330.1	2.5e-102	378.3	Mitotic spindle checkpoint protein
augustus_masked-VaccDscaff14-processed-gene-210.2-mRNA-1	4096.XP_009775190.1	1.7e-20	107.1
maker-VaccDscaff14-snap-gene-229.35-mRNA-1	29760.VIT_01s0026g00810.t01	1.3e-161	576.6	Protein ALTERED XYLOGLUCAN
snap_masked-VaccDscaff14-processed-gene-229.23-mRNA-1	71139.XP_010031828.1	3.6e-152	545.0	Pre-mRNA-splicing factor CWC22 homolog
maker-VaccDscaff14-snap-gene-233.24-mRNA-1	29760.VIT_01s0026g00930.t01	1.2e-157	562.8	Zinc finger MYND domain-containing protein
maker-VaccDscaff14-snap-gene-238.20-mRNA-1	4096.XP_009799778.1	2.3e-60	238.4	50S ribosomal protein L18
maker-VaccDscaff14-snap-gene-247.32-mRNA-1	3988.XP_002512094.1	8.5e-284	982.6	Methyltransferase
snap_masked-VaccDscaff14-processed-gene-256.23-mRNA-1	3983.cassava4.1_032950m	5e-08	63.9	CLAVATA3 ESR (CLE)-related protein
maker-VaccDscaff14-snap-gene-263.38-mRNA-1	4098.XP_009615038.1	4.3e-122	444.5	Sec-independent protein translocase protein (TatC)
augustus_masked-VaccDscaff14-processed-gene-265.6-mRNA-1	29760.VIT_08s0007g08190.t01	3.3e-229	800.8	Pentatricopeptide repeat-containing protein
augustus_masked-VaccDscaff14-processed-gene-266.8-mRNA-1	3694.POPTR_0005s21130.1	3.6e-60	238.4	Dof zinc finger protein
maker-VaccDscaff14-augustus-gene-268.33-mRNA-1	218851.Aquca_003_00788.1	1.4e-06	61.2	protease Do-like 14
augustus_masked-VaccDscaff14-processed-gene-270.6-mRNA-1	4155.Migut.B00656.1.p	6.6e-26	124.8	Belongs to the universal ribosomal protein uL3 family
snap_masked-VaccDscaff14-processed-gene-276.13-mRNA-1	29760.VIT_18s0001g01800.t01	6.1e-122	444.5	cleavage stimulation factor
augustus_masked-VaccDscaff14-processed-gene-283.4-mRNA-1	29760.VIT_14s0060g01220.t01	7.7e-56	225.3	Pentatricopeptide repeat-containing protein
maker-VaccDscaff14-snap-gene-288.42-mRNA-1	3641.EOY11723	3e-242	844.7	Catalyzes oxidative pentose-phosphate pathway
maker-VaccDscaff14-augustus-gene-295.17-mRNA-1	3641.EOY07938	3.1e-219	768.1	FAD synthase-like
augustus_masked-VaccDscaff14-processed-gene-296.6-mRNA-1	4098.XP_009618312.1	3.7e-78	298.1	Agamous-like MADS-box protein AGL80
maker-VaccDscaff14-augustus-gene-302.21-mRNA-1	3641.EOY25743	2.3e-277	961.4	Mitotic checkpoint family protein
maker-VaccDscaff14-snap-gene-304.33-mRNA-1	3641.EOY22202	7e-107	395.6	Belongs to the disease resistance NB-LRR family
maker-VaccDscaff14-augustus-gene-321.40-mRNA-1	4096.XP_009783834.1	2.5e-207	728.0	Belongs to the TUB family
maker-VaccDscaff14-snap-gene-325.44-mRNA-1	4113.PGSC0003DMT400032762	6e-118	431.0
maker-VaccDscaff14-snap-gene-339.45-mRNA-1	85681.XP_006427604.1	1.3e-160	574.3	Belongs to the disease resistance NB-LRR family
maker-VaccDscaff14-augustus-gene-342.48-mRNA-1	3760.EMJ01712	1.4e-140	505.8	Catalyzes xyloglucan endohydrolysis and endotransglycosylation
maker-VaccDscaff14-snap-gene-348.61-mRNA-1	4155.Migut.N01137.1.p	0.0	1204.5	Glycosyl hydrolase family 10
maker-VaccDscaff14-augustus-gene-350.33-mRNA-1	4432.XP_010271744.1	5.9e-195	686.8	3-oxo-Delta(4,5)-steroid 5-beta-reductase-like
maker-VaccDscaff14-snap-gene-353.56-mRNA-1	29760.VIT_03s0091g00050.t01	5.1e-157	560.8	Belongs to the AB hydrolase superfamily. Lipase family
augustus_masked-VaccDscaff14-processed-gene-353.9-mRNA-1	2711.XP_006486988.1	2.6e-94	351.7	Secretory protein
augustus_masked-VaccDscaff14-processed-gene-384.4-mRNA-1	4096.XP_009759252.1	3.4e-71	274.6	Dirigent proteins impart stereoselectivity
snap_masked-VaccDscaff14-processed-gene-387.17-mRNA-1	29760.VIT_03s0038g02620.t01	6.8e-188	664.1	RNA-binding protein
maker-VaccDscaff14-augustus-gene-389.25-mRNA-1	3983.cassava4.1_015362m	1.4e-47	196.4	Coiled-coil domain-containing protein
maker-VaccDscaff14-snap-gene-393.31-mRNA-1	3760.EMJ02285	2.6e-156	558.5	protein phosphatase 2C 27
maker-VaccDscaff121-snap-gene-1.35-mRNA-1	3988.XP_002512882.1	4.2e-179	634.8	protein At2g33490-like isoform
augustus_masked-VaccDscaff114-processed-gene-0.2-mRNA-1	4098.XP_009622634.1	7.7e-176	624.4	Zinc finger, C3HC4 type (RING finger)
maker-VaccDscaff114-augustus-gene-1.32-mRNA-1	29760.VIT_07s0104g00900.t01	2.3e-207	728.4	LEC14B protein
snap_masked-VaccDscaff53-processed-gene-10.25-mRNA-1	4098.XP_009605166.1	1.9e-106	392.5	Eukaryotic aspartyl protease
snap_masked-VaccDscaff733-processed-gene-0.5-mRNA-1	161934.XP_010694005.1	6.8e-07	60.1	receptor-like protein kinase
maker-VaccDscaff19-snap-gene-2.44-mRNA-1	3694.POPTR_0019s07610.1	2.4e-49	202.6	Four repeated domains in the Fasciclin I family of proteins
augustus_masked-VaccDscaff19-processed-gene-3.7-mRNA-1	4432.XP_010248153.1	7.9e-38	163.3	serine protease inhibitor, Kazal-type family protein
maker-VaccDscaff19-augustus-gene-8.38-mRNA-1	4113.PGSC0003DMT400023575	3.7e-171	607.4	E3 ubiquitin-protein ligase
augustus_masked-VaccDscaff19-processed-gene-9.5-mRNA-1	225117.XP_009356034.1	1.9e-21	109.4	Domain of unknown function (DUF4539)
augustus_masked-VaccDscaff19-processed-gene-11.4-mRNA-1	29760.VIT_16s0050g02400.t01	5.1e-84	318.2	transcription factor
maker-VaccDscaff19-augustus-gene-20.33-mRNA-1	3694.POPTR_0015s13630.1	1.1e-249	869.8	transcriptional co-repressor
maker-VaccDscaff19-augustus-gene-27.36-mRNA-1	3641.EOY22885	1.6e-13	82.8	Belongs to the small heat shock protein (HSP20) family
maker-VaccDscaff19-snap-gene-27.54-mRNA-1	29760.VIT_16s0013g02100.t01	7.1e-184	650.2	phosphotransferase activity, carboxyl group as acceptor
maker-VaccDscaff19-augustus-gene-27.35-mRNA-1	4006.Lus10028976	1.4e-24	118.6	Clathrin is the major protein of polyhedral coat of coated pits
maker-VaccDscaff19-snap-gene-40.40-mRNA-1	29760.VIT_13s0067g01270.t01	9e-119	433.7	phosphatase 2C
augustus_masked-VaccDscaff19-processed-gene-44.14-mRNA-1	29730.Gorai.012G074800.1	3.3e-49	200.7	60S ribosomal Protein
augustus_masked-VaccDscaff19-processed-gene-46.20-mRNA-1	3983.cassava4.1_017974m	3.7e-74	284.3	Belongs to the small heat shock protein (HSP20) family
augustus_masked-VaccDscaff19-processed-gene-53.5-mRNA-1	29760.VIT_13s0019g00710.t01	2.2e-75	288.9	enoyl-CoA hydratase isomerase family protein
augustus_masked-VaccDscaff19-processed-gene-58.4-mRNA-1	4113.PGSC0003DMT400073100	1.1e-24	121.3	F-box associated domain
maker-VaccDscaff19-augustus-gene-62.27-mRNA-1	29760.VIT_13s0019g04200.t01	4.6e-207	727.2	lipolytic acyl hydrolase (LAH)
maker-VaccDscaff19-augustus-gene-66.26-mRNA-1	161934.XP_010671205.1	9.2e-11	75.5	ribonuclease H protein At1g65750
augustus_masked-VaccDscaff19-processed-gene-78.5-mRNA-1	3641.EOY04632	2.3e-90	339.0	Coiled-coil domain-containing protein 94 homolog
maker-VaccDscaff19-augustus-gene-79.16-mRNA-1	4432.XP_010247827.1	3.1e-243	848.2	expressed protein
maker-VaccDscaff19-snap-gene-89.24-mRNA-1	42345.XP_008785629.1	7.3e-07	61.6	Protein DROOPING LEAF
maker-VaccDscaff19-snap-gene-96.37-mRNA-1	29760.VIT_04s0023g00600.t01	4.7e-128	464.2	Isopentenyl-diphosphate delta-isomerase
maker-VaccDscaff19-snap-gene-114.25-mRNA-1	4432.XP_010262120.1	9.4e-23	114.0	E3 ubiquitin-protein ligase
maker-VaccDscaff19-augustus-gene-116.37-mRNA-1	29760.VIT_01s0011g02730.t01	2.9e-306	1057.4	ABC transporter G family member
maker-VaccDscaff19-augustus-gene-118.23-mRNA-1	4098.XP_009600369.1	7e-81	308.1	Leucine rich repeat
maker-VaccDscaff19-snap-gene-154.21-mRNA-1	4098.XP_009618540.1	6.2e-241	840.1	ATP-NAD kinase
maker-VaccDscaff19-augustus-gene-165.19-mRNA-1	29730.Gorai.005G186700.1	1.4e-125	456.1	Non-functional NADPH-dependent codeinone reductase 2-like
maker-VaccDscaff19-snap-gene-176.45-mRNA-1	4098.XP_009624549.1	1.2e-103	382.9	Pentatricopeptide repeat-containing protein
maker-VaccDscaff19-snap-gene-186.31-mRNA-1	4113.PGSC0003DMT400059123	2.2e-198	699.1	Belongs to the Ca(2 ) cation antiporter (CaCA)
maker-VaccDscaff19-augustus-gene-188.14-mRNA-1	3988.XP_002522541.1	1.3e-52	212.6	GDSL esterase lipase
maker-VaccDscaff19-augustus-gene-193.28-mRNA-1	4096.XP_009775897.1	1.1e-41	176.4	Uncharacterised protein family UPF0052
maker-VaccDscaff19-snap-gene-199.30-mRNA-1	4113.PGSC0003DMT400050521	6.2e-53	214.5	Late embryogenesis abundant protein
augustus_masked-VaccDscaff19-processed-gene-210.1-mRNA-1	3641.EOY23100	8.1e-29	136.3	Plant mobile domain
maker-VaccDscaff19-snap-gene-217.21-mRNA-1	3641.EOY27979	7.3e-72	277.3	transcription
augustus_masked-VaccDscaff19-processed-gene-220.2-mRNA-1	3760.EMJ27390	5.8e-39	169.9	Plant mobile domain
maker-VaccDscaff19-snap-gene-234.28-mRNA-1	4432.XP_010242791.1	3.8e-91	342.0	magnesium transporter
maker-VaccDscaff19-augustus-gene-236.20-mRNA-1	3641.EOY28324	3.5e-22	110.9	polyphenol oxidase
snap_masked-VaccDscaff19-processed-gene-250.9-mRNA-1	4113.PGSC0003DMT400013041	9.2e-16	89.4	Reverse transcriptase-like
maker-VaccDscaff19-augustus-gene-254.25-mRNA-1	3750.XP_008383964.1	2.3e-276	958.4	G-type lectin S-receptor-like serine threonine-protein kinase
augustus_masked-VaccDscaff19-processed-gene-255.5-mRNA-1	29730.Gorai.011G019800.1	1.2e-46	194.1	Pentatricopeptide repeat-containing protein
augustus_masked-VaccDscaff19-processed-gene-263.2-mRNA-1	29760.VIT_10s0116g00280.t01	2.1e-52	213.0	UDP-3-O-acylglucosamine N-acyltransferase 2 mitochondrial
augustus_masked-VaccDscaff19-processed-gene-263.8-mRNA-1	3983.cassava4.1_029611m	1.5e-74	285.8	Late embryogenesis abundant protein
augustus_masked-VaccDscaff19-processed-gene-270.2-mRNA-1	4432.XP_010276120.1	4e-129	468.8	Belongs to the glycosyltransferase 31 family
snap_masked-VaccDscaff19-processed-gene-284.23-mRNA-1	29760.VIT_07s0005g03860.t01	1.1e-62	247.3	Mitochondrial transcription termination factor family protein
maker-VaccDscaff19-snap-gene-286.43-mRNA-1	2711.XP_006468358.1	6.6e-178	630.9	Belongs to the oxygen-dependent FAD-linked oxidoreductase
snap_masked-VaccDscaff19-processed-gene-290.13-mRNA-1	29760.VIT_16s0013g00060.t01	2.4e-65	255.4	germin-like protein
maker-VaccDscaff19-snap-gene-294.40-mRNA-1	4155.Migut.M01897.1.p	1.2e-11	76.3
maker-VaccDscaff19-snap-gene-304.36-mRNA-1	3760.EMJ15316	1.9e-12	78.2	LRR receptor-like serine threonine-protein kinase
maker-VaccDscaff19-augustus-gene-305.24-mRNA-1	29760.VIT_10s0003g04090.t01	7.5e-129	467.6	Remorin, C-terminal region
maker-VaccDscaff19-snap-gene-309.58-mRNA-1	29760.VIT_11s0016g00350.t01	0.0	1285.8	Conserved oligomeric Golgi complex subunit
augustus_masked-VaccDscaff19-processed-gene-310.5-mRNA-1	981085.XP_010110953.1	3.9e-259	900.6	9-cis-epoxycarotenoid dioxygenase
maker-VaccDscaff19-snap-gene-311.40-mRNA-1	3880.AES72963	1.1e-297	1029.2	Pentatricopeptide repeat-containing protein
maker-VaccDscaff19-augustus-gene-312.36-mRNA-1	3649.evm.model.supercontig_32.23	3e-87	328.2	EF-hand, calcium binding motif
snap_masked-VaccDscaff19-processed-gene-313.17-mRNA-1	3694.POPTR_0009s15150.3	9.1e-17	92.8	Cytochrome b-c1 complex subunit 9-like
snap_masked-VaccDscaff19-processed-gene-315.44-mRNA-1	3641.EOY33487	6e-47	194.1	proteinaceous RNase P
snap_masked-VaccDscaff19-processed-gene-315.39-mRNA-1	3641.EOY11024	8.6e-07	61.2	Ribonuclease H protein
snap_masked-VaccDscaff19-processed-gene-330.18-mRNA-1	29760.VIT_06s0004g02540.t01	6.4e-61	240.7	Kiwellin-like
maker-VaccDscaff19-snap-gene-337.58-mRNA-1	3983.cassava4.1_004381m	5.2e-181	641.0	Reverse transcriptase-like
maker-VaccDscaff19-snap-gene-340.36-mRNA-1	29760.VIT_06s0004g03590.t01	9.1e-145	520.4	Transcription factor
snap_masked-VaccDscaff19-processed-gene-341.22-mRNA-1	29760.VIT_06s0004g03710.t01	5.4e-199	700.7	BTB POZ domain-containing protein
augustus_masked-VaccDscaff19-processed-gene-345.5-mRNA-1	29760.VIT_06s0004g04180.t01	1.1e-16	93.2	Zinc finger protein
maker-VaccDscaff19-augustus-gene-350.24-mRNA-1	29760.VIT_06s0004g04620.t01	9.7e-98	364.8	Domain of unknown function (DUF4378)
snap_masked-VaccDscaff19-processed-gene-351.19-mRNA-1	4572.TRIUR3_02416-P1	1.6e-21	108.6
maker-VaccDscaff19-augustus-gene-354.23-mRNA-1	4432.XP_010256893.1	1.5e-39	169.5
snap_masked-VaccDscaff19-processed-gene-357.13-mRNA-1	3827.XP_004505963.1	4.1e-63	247.7	response to heat
maker-VaccDscaff19-snap-gene-359.35-mRNA-1	4096.XP_009763196.1	4.4e-212	744.2	Major Facilitator Superfamily
maker-VaccDscaff19-augustus-gene-372.29-mRNA-1	13333.ERN04121	1.6e-111	409.1	membrane protein At1g06890-like
maker-VaccDscaff19-augustus-gene-379.28-mRNA-1	29760.VIT_07s0151g00950.t01	1.3e-55	222.6
augustus_masked-VaccDscaff19-processed-gene-379.10-mRNA-1	981085.XP_010090409.1	2e-271	941.8	Belongs to the terpene synthase family
maker-VaccDscaff15-snap-gene-7.35-mRNA-1	29730.Gorai.005G150100.1	3.4e-15	87.8	homeobox-leucine zipper protein
maker-VaccDscaff15-snap-gene-21.24-mRNA-1	29760.VIT_06s0004g00570.t01	7.1e-82	310.8	RNA polymerase II transcription regulator recruiting activity
augustus_masked-VaccDscaff15-processed-gene-53.9-mRNA-1	3641.EOY23100	1.6e-35	157.9	Plant mobile domain
maker-VaccDscaff15-snap-gene-60.31-mRNA-1	4098.XP_009618540.1	9.6e-249	865.9	ATP-NAD kinase
maker-VaccDscaff15-augustus-gene-71.39-mRNA-1	4432.XP_010242943.1	6.3e-17	94.7	Helicase conserved C-terminal domain
maker-VaccDscaff15-snap-gene-73.34-mRNA-1	3694.POPTR_0009s05210.1	5.4e-145	521.9	Acts as a Mg(2 ) transporter
maker-VaccDscaff15-snap-gene-79.38-mRNA-1	15368.BRADI2G61140.1	8.3e-12	76.3	Phosphoesterase family
maker-VaccDscaff15-snap-gene-82.48-mRNA-1	4098.XP_009624549.1	2e-103	382.1	Pentatricopeptide repeat-containing protein
maker-VaccDscaff15-snap-gene-100.30-mRNA-1	29760.VIT_06s0009g00890.t01	0.0	1114.8	Belongs to the peptidase C19 family
maker-VaccDscaff15-snap-gene-101.26-mRNA-1	29760.VIT_14s0036g01040.t01	1.6e-290	1005.0	Lysosomal beta glucosidase-like
augustus_masked-VaccDscaff15-processed-gene-123.4-mRNA-1	4096.XP_009802869.1	1.2e-149	536.6	Plant protein of unknown function (DUF641)
augustus_masked-VaccDscaff15-processed-gene-125.2-mRNA-1	3641.EOY23100	2e-07	63.9	Plant mobile domain
augustus_masked-VaccDscaff15-processed-gene-135.10-mRNA-1	3760.EMJ27390	1.7e-38	168.3	Plant mobile domain
augustus_masked-VaccDscaff15-processed-gene-172.1-mRNA-1	3880.AES68114	7.4e-17	95.9	Domain of unknown function (DUF4283)
maker-VaccDscaff15-augustus-gene-176.26-mRNA-1	3750.XP_008383964.1	5.5e-264	917.1	G-type lectin S-receptor-like serine threonine-protein kinase
maker-VaccDscaff15-augustus-gene-195.31-mRNA-1	29760.VIT_10s0003g01300.t01	1.1e-07	63.2	transcription factor
maker-VaccDscaff15-augustus-gene-203.15-mRNA-1	4096.XP_009777767.1	1.7e-244	852.0	GDP-fucose protein O-fucosyltransferase
augustus_masked-VaccDscaff15-processed-gene-208.4-mRNA-1	2711.XP_006467336.1	2e-27	129.4
snap_masked-VaccDscaff15-processed-gene-214.12-mRNA-1	29760.VIT_01s0011g01100.t01	0.0	1346.6	Pentatricopeptide repeat-containing protein
maker-VaccDscaff15-augustus-gene-230.25-mRNA-1	3641.EOY27518	4.6e-74	285.0	BOI-related E3 ubiquitin-protein ligase
snap_masked-VaccDscaff15-processed-gene-232.20-mRNA-1	29760.VIT_07s0005g03860.t01	4.4e-64	251.9	Mitochondrial transcription termination factor family protein
snap_masked-VaccDscaff15-processed-gene-237.11-mRNA-1	3694.POPTR_0010s06410.1	2.4e-18	97.8	BAHD acyltransferase At5g47980-like
maker-VaccDscaff15-snap-gene-240.31-mRNA-1	3983.cassava4.1_032086m	3.6e-193	681.8	Belongs to the oxygen-dependent FAD-linked oxidoreductase
augustus_masked-VaccDscaff15-processed-gene-244.3-mRNA-1	29760.VIT_16s0013g00060.t01	7.1e-65	253.8	germin-like protein
augustus_masked-VaccDscaff15-processed-gene-247.7-mRNA-1	4155.Migut.M01897.1.p	8.5e-14	83.6
augustus_masked-VaccDscaff15-processed-gene-250.4-mRNA-1	29760.VIT_10s0003g04560.t01	0.0	2466.0	187-kDa microtubule-associated protein
maker-VaccDscaff15-snap-gene-261.40-mRNA-1	29760.VIT_11s0016g00350.t01	0.0	1283.1	Conserved oligomeric Golgi complex subunit
augustus_masked-VaccDscaff15-processed-gene-262.8-mRNA-1	981085.XP_010110953.1	4.5e-263	913.7	9-cis-epoxycarotenoid dioxygenase
maker-VaccDscaff15-augustus-gene-265.33-mRNA-1	3649.evm.model.supercontig_32.23	3.9e-87	327.8	EF-hand, calcium binding motif
maker-VaccDscaff15-snap-gene-265.49-mRNA-1	3694.POPTR_0009s15150.3	1.9e-26	124.4	Cytochrome b-c1 complex subunit 9-like
maker-VaccDscaff15-snap-gene-276.25-mRNA-1	29760.VIT_06s0061g01010.t01	0.0	1236.9	Lysosomal Pro-X carboxypeptidase-like
maker-VaccDscaff15-augustus-gene-283.25-mRNA-1	29760.VIT_06s0004g02550.t01	2.4e-71	275.8	Kiwellin-like
snap_masked-VaccDscaff15-processed-gene-295.23-mRNA-1	29760.VIT_06s0004g03590.t01	1.2e-144	520.0	Transcription factor
maker-VaccDscaff15-augustus-gene-301.19-mRNA-1	4096.XP_009772875.1	1.6e-96	359.4	membrane protein At1g06890
maker-VaccDscaff15-snap-gene-302.37-mRNA-1	4155.Migut.N00746.1.p	7.5e-60	237.3	LOB domain-containing protein
maker-VaccDscaff15-snap-gene-306.40-mRNA-1	3641.EOY34625	1.8e-25	122.1	Belongs to the 'GDSL' lipolytic enzyme family
maker-VaccDscaff15-augustus-gene-314.41-mRNA-1	4432.XP_010256609.1	1.4e-140	506.1	GDP-mannose transporter
maker-VaccDscaff15-augustus-gene-315.27-mRNA-1	4113.PGSC0003DMT400010658	4.5e-71	277.3	BEST Arabidopsis thaliana protein match is
maker-VaccDscaff15-snap-gene-317.43-mRNA-1	29760.VIT_06s0004g04190.t01	2.5e-139	502.7	TPL-binding domain in jasmonate signalling
maker-VaccDscaff15-snap-gene-328.56-mRNA-1	29760.VIT_06s0004g05250.t01	1.4e-170	607.1	Fringe-related protein
maker-VaccDscaff15-augustus-gene-331.36-mRNA-1	4096.XP_009763196.1	1.2e-214	752.7	Major Facilitator Superfamily
maker-VaccDscaff15-augustus-gene-333.34-mRNA-1	3694.POPTR_0019s15260.1	3.8e-31	140.2	Cytochrome b-c1 complex subunit
maker-VaccDscaff15-augustus-gene-339.25-mRNA-1	29730.Gorai.001G228500.1	8.6e-24	117.1	Transcription factor IBH1-like
maker-VaccDscaff15-augustus-gene-340.40-mRNA-1	4098.XP_009593452.1	2.2e-230	805.1	Lipase (class 3)
maker-VaccDscaff15-augustus-gene-349.47-mRNA-1	3983.cassava4.1_012740m	6.2e-112	410.6	Tetratricopeptide repeat
maker-VaccDscaff15-augustus-gene-353.26-mRNA-1	3983.cassava4.1_001897m	1.6e-271	942.2	WD domain, G-beta repeat
maker-VaccDscaff15-snap-gene-355.52-mRNA-1	29760.VIT_09s0054g01220.t01	0.0	1276.5	Belongs to the terpene cyclase mutase family
maker-VaccDscaff15-augustus-gene-369.23-mRNA-1	29760.VIT_07s0151g00950.t01	1e-55	223.0
maker-VaccDscaff15-snap-gene-369.39-mRNA-1	3641.EOX94746	7.4e-268	930.2	Belongs to the terpene synthase family
maker-VaccDscaff15-snap-gene-380.56-mRNA-1	4530.OS01T0315850-00	4.8e-20	104.4
maker-VaccDscaff15-augustus-gene-382.30-mRNA-1	29760.VIT_05s0077g01840.t01	1.9e-83	315.5	Belongs to the eukaryotic ribosomal protein eL19 family
maker-VaccDscaff15-snap-gene-382.39-mRNA-1	57918.XP_004290823.1	0.0	1649.8	Belongs to the TRAFAC class myosin-kinesin ATPase
augustus_masked-VaccDscaff15-processed-gene-384.6-mRNA-1	29760.VIT_07s0005g01310.t01	4.4e-53	214.5	Multidrug resistance protein ABC transporter family protein
augustus_masked-VaccDscaff15-processed-gene-386.4-mRNA-1	3641.EOY00717	4.6e-17	94.0	Transcription factor
maker-VaccDscaff15-snap-gene-390.34-mRNA-1	29760.VIT_07s0005g02650.t01	4.7e-69	267.7	N-terminal domain of NEFA-interacting nuclear protein NIP30
maker-VaccDscaff148-snap-gene-1.41-mRNA-1	3649.evm.model.supercontig_115.64	0.0	1604.7	Magnesium-dependent enzyme
snap_masked-VaccDscaff100-processed-gene-0.6-mRNA-1	4432.XP_010275423.1	9.7e-25	120.2	ethylene-responsive transcription factor
augustus_masked-VaccDscaff100-processed-gene-3.5-mRNA-1	3988.XP_002527970.1	1e-32	147.5	Fasciclin-like arabinogalactan protein
augustus_masked-VaccDscaff100-processed-gene-4.10-mRNA-1	3641.EOY24402	1.3e-56	226.9	Zinc finger protein
maker-VaccDscaff386-snap-gene-0.31-mRNA-1	3983.cassava4.1_031640m	5.9e-29	133.7	Mitochondrial import inner membrane translocase subunit
maker-VaccDscaff1309-snap-gene-0.11-mRNA-1	264402.Cagra.0114s0043.1.p	7.8e-17	93.2	Multiple C2 and transmembrane domain-containing protein
maker-VaccDscaff1309-snap-gene-0.12-mRNA-1	13333.ERN11655	2.9e-10	71.2	Multiple C2 and transmembrane domain-containing protein
maker-VaccDscaff861-snap-gene-0.9-mRNA-1	4537.OPUNC07G01790.1	3.7e-88	332.4	peptidase inhibitor activity
maker-VaccDscaff247-snap-gene-0.62-mRNA-1	4096.XP_009804609.1	8e-159	566.6	Belongs to the class I-like SAM-binding methyltransferase
maker-VaccDscaff247-snap-gene-0.64-mRNA-1	29760.VIT_00s0299g00070.t01	9.6e-35	153.3
snap_masked-VaccDscaff49-processed-gene-10.28-mRNA-1	4432.XP_010267527.1	4.4e-237	827.4	Alpha-trehalose glucohydrolase
maker-VaccDscaff49-augustus-gene-17.31-mRNA-1	29730.Gorai.003G074300.1	1.8e-11	76.6	Protein NLP7-like isoform X1
maker-VaccDscaff49-augustus-gene-27.21-mRNA-1	29760.VIT_02s0025g01370.t01	2.4e-60	240.0
maker-VaccDscaff49-augustus-gene-42.25-mRNA-1	3750.XP_008366428.1	1.3e-230	806.6	glycerophosphoryl diester phosphodiesterase
maker-VaccDscaff49-snap-gene-45.46-mRNA-1	3988.XP_002509785.1	1.4e-62	246.1	Glutathione S-transferase
maker-VaccDscaff49-snap-gene-45.55-mRNA-1	3641.EOY24688	9.9e-220	769.6	O-glucosyltransferase
maker-VaccDscaff189-augustus-gene-0.18-mRNA-1	29760.VIT_10s0003g04560.t01	0.0	2459.5	187-kDa microtubule-associated protein
maker-VaccDscaff189-snap-gene-1.38-mRNA-1	29760.VIT_10s0003g04470.t01	1e-110	406.4	ABC transporter C family member
maker-VaccDscaff9-augustus-gene-1.21-mRNA-1	29760.VIT_05s0077g00510.t01	2.8e-311	1074.7	Neutral invertase
maker-VaccDscaff9-augustus-gene-5.34-mRNA-1	29760.VIT_05s0077g01470.t01	1.1e-289	1002.3	cobra-like protein
maker-VaccDscaff9-snap-gene-15.39-mRNA-1	3760.EMJ28477	1.1e-18	99.8	Protein of unknown function (DUF679)
augustus_masked-VaccDscaff9-processed-gene-19.4-mRNA-1	3641.EOY06271	5.1e-38	165.6	F-box Kelch-repeat protein
maker-VaccDscaff9-augustus-gene-28.31-mRNA-1	4098.XP_009606154.1	2.1e-211	742.3	Legume lectin domain
maker-VaccDscaff9-snap-gene-29.23-mRNA-1	3983.cassava4.1_014112m	6.1e-110	403.7	Belongs to the eukaryotic ribosomal protein eS1 family
snap_masked-VaccDscaff9-processed-gene-39.18-mRNA-1	2711.XP_006470699.1	8.8e-11	73.2	LRR-repeat protein
maker-VaccDscaff9-snap-gene-47.37-mRNA-1	102107.XP_008224330.1	1.6e-42	179.5	MazG nucleotide pyrophosphohydrolase domain
maker-VaccDscaff9-augustus-gene-64.23-mRNA-1	3988.XP_002518131.1	4.8e-232	810.4	Ankyrin repeat domain-containing protein
maker-VaccDscaff9-snap-gene-72.23-mRNA-1	225117.XP_009352254.1	1.8e-08	65.5	LRR receptor-like serine threonine-protein kinase
augustus_masked-VaccDscaff9-processed-gene-74.9-mRNA-1	3641.EOY22866	1e-125	458.4	LRR receptor-like serine threonine-protein kinase
maker-VaccDscaff9-snap-gene-100.37-mRNA-1	29760.VIT_00s0941g00010.t01	2e-86	325.9	DYW family of nucleic acid deaminases
maker-VaccDscaff9-snap-gene-100.36-mRNA-1	29760.VIT_00s0941g00010.t01	3.5e-20	104.8	DYW family of nucleic acid deaminases
snap_masked-VaccDscaff9-processed-gene-115.20-mRNA-1	4098.XP_009629445.1	7.6e-17	94.0	Cysteine proteinase inhibitor
maker-VaccDscaff9-augustus-gene-116.28-mRNA-1	4577.GRMZM2G014180_P04	3.2e-17	96.3	Transcription initiation factor IIF, alpha subunit (TFIIF-alpha)
augustus_masked-VaccDscaff9-processed-gene-120.4-mRNA-1	3694.POPTR_0004s13930.1	1e-07	63.2
snap_masked-VaccDscaff9-processed-gene-128.12-mRNA-1	102107.XP_008224845.1	3e-25	122.1	NDR1-like
augustus_masked-VaccDscaff9-processed-gene-147.4-mRNA-1	3760.EMJ00315	4e-26	127.1	Plant mobile domain
maker-VaccDscaff9-augustus-gene-155.36-mRNA-1	3988.XP_002519060.1	0.0	2287.3	DNA-dependent RNA polymerase
augustus_masked-VaccDscaff9-processed-gene-161.4-mRNA-1	3641.EOY23100	5.1e-38	167.2	Plant mobile domain
maker-VaccDscaff9-augustus-gene-206.17-mRNA-1	3760.EMJ28353	1.7e-74	285.8	GEM-like protein
maker-VaccDscaff9-augustus-gene-208.15-mRNA-1	4533.OB04G36510.1	3.6e-29	134.8	Belongs to the dihydroorotate dehydrogenase family
maker-VaccDscaff9-augustus-gene-210.26-mRNA-1	3750.XP_008390241.1	2e-18	99.0
augustus_masked-VaccDscaff9-processed-gene-222.3-mRNA-1	3847.GLYMA07G01080.1	1.2e-11	77.8	Serine threonine-protein phosphatase 7 long form homolog
augustus_masked-VaccDscaff9-processed-gene-233.2-mRNA-1	15368.BRADI1G07755.1	3.8e-13	83.2	Plant mobile domain
maker-VaccDscaff9-snap-gene-264.40-mRNA-1	4096.XP_009764998.1	2e-07	62.8	transcription factor PosF21
augustus_masked-VaccDscaff9-processed-gene-266.4-mRNA-1	29760.VIT_01s0127g00250.t01	4.1e-100	371.7	F-box Kelch-repeat protein
maker-VaccDscaff9-snap-gene-268.38-mRNA-1	4098.XP_009609897.1	9e-55	221.5	Ankyrin repeats (3 copies)
maker-VaccDscaff9-augustus-gene-269.38-mRNA-1	29760.VIT_01s0127g00470.t01	3.2e-169	601.3	Belongs to the glycosyltransferase 8 family
maker-VaccDscaff9-augustus-gene-283.39-mRNA-1	2711.XP_006483777.1	2.9e-190	671.4	IAA-amino acid hydrolase ILR1-like
maker-VaccDscaff9-augustus-gene-287.26-mRNA-1	57918.XP_004298601.1	3.8e-43	181.4
augustus_masked-VaccDscaff9-processed-gene-290.4-mRNA-1	102107.XP_008221679.1	1.5e-134	485.7	Hypersensitive-induced response protein
maker-VaccDscaff9-augustus-gene-291.23-mRNA-1	29760.VIT_14s0108g00030.t01	2.4e-189	668.3	Pectate lyase
maker-VaccDscaff9-augustus-gene-291.29-mRNA-1	29760.VIT_01s0026g01750.t01	4.3e-192	677.9	Pentatricopeptide repeat-containing protein
maker-VaccDscaff9-snap-gene-294.37-mRNA-1	3983.cassava4.1_015655m	3.5e-80	304.7	Vesicle transport V-snare
augustus_masked-VaccDscaff9-processed-gene-294.9-mRNA-1	4096.XP_009786893.1	4e-126	458.0
augustus_masked-VaccDscaff9-processed-gene-308.6-mRNA-1	3656.XP_008453465.1	1.5e-23	115.5	Belongs to the multi antimicrobial extrusion (MATE) family
maker-VaccDscaff9-augustus-gene-314.35-mRNA-1	4432.XP_010262942.1	7.7e-34	150.6	AP2 ERF and B3 domain-containing transcription
augustus_masked-VaccDscaff9-processed-gene-325.5-mRNA-1	3641.EOY22094	1.9e-81	309.7	transcription factor
maker-VaccDscaff9-augustus-gene-330.30-mRNA-1	4096.XP_009800357.1	7.5e-51	206.5	MazG-like family
maker-VaccDscaff9-snap-gene-336.50-mRNA-1	29760.VIT_17s0000g05860.t01	9.9e-192	676.4	ABC transporter A family member
maker-VaccDscaff9-snap-gene-343.45-mRNA-1	29760.VIT_10s0003g00420.t01	7.4e-22	110.5	Auxin response factors (ARFs) are transcriptional factors
snap_masked-VaccDscaff9-processed-gene-353.12-mRNA-1	3827.XP_004502856.1	3.8e-22	110.2	LOB domain-containing protein
maker-VaccDscaff9-augustus-gene-362.20-mRNA-1	85681.XP_006440104.1	3.3e-39	167.9	SAP domain-containing protein
maker-VaccDscaff9-augustus-gene-365.29-mRNA-1	225117.XP_009359415.1	5.3e-85	320.9	Gamma carbonic anhydrase-like 2
augustus_masked-VaccDscaff9-processed-gene-371.4-mRNA-1	4155.Migut.N03023.1.p	3e-12	78.2
maker-VaccDscaff9-augustus-gene-376.33-mRNA-1	3694.POPTR_0001s03340.1	2.4e-71	275.4
maker-VaccDscaff9-augustus-gene-382.36-mRNA-1	29760.VIT_09s0002g07010.t01	6.2e-133	480.7	SNF1-related protein kinase regulatory subunit gamma-like
maker-VaccDscaff9-snap-gene-382.52-mRNA-1	3983.cassava4.1_006224m	8.5e-244	849.4	Binds to the signal sequence of presecretory protein
snap_masked-VaccDscaff9-processed-gene-392.18-mRNA-1	4155.Migut.D01021.1.p	7.2e-28	130.6
maker-VaccDscaff9-snap-gene-403.26-mRNA-1	57918.XP_004297544.1	3.5e-212	745.3	Histone-binding protein RBBP4 or subunit C of CAF1 complex
maker-VaccDscaff9-augustus-gene-407.25-mRNA-1	4096.XP_009779656.1	0.0	1568.5	Exportin 1-like protein
maker-VaccDscaff9-snap-gene-408.34-mRNA-1	4096.XP_009761926.1	3.7e-33	147.9	RING-box protein
maker-VaccDscaff9-snap-gene-411.54-mRNA-1	3641.EOY26362	1.9e-187	662.1	metal tolerance protein
maker-VaccDscaff61-augustus-gene-0.35-mRNA-1	2711.XP_006474012.1	1.1e-64	253.1	DNA binding
augustus_masked-VaccDscaff61-processed-gene-7.2-mRNA-1	3750.XP_008353355.1	6.9e-36	157.1	Protein GLUTAMINE DUMPER
maker-VaccDscaff50-augustus-gene-9.19-mRNA-1	4081.Solyc06g072620.2.1	3.4e-83	315.1	Mediates both low-affinity uptake and efflux of sugar
maker-VaccDscaff50-snap-gene-12.31-mRNA-1	29760.VIT_17s0000g00320.t01	0.0	1100.5	Auxin response factors (ARFs) are transcriptional factors
maker-VaccDscaff50-augustus-gene-24.36-mRNA-1	29760.VIT_15s0046g01940.t01	9.6e-39	167.5	Mechanosensitive ion channel protein 1
maker-VaccDscaff37-augustus-gene-37.18-mRNA-1	29760.VIT_12s0134g00400.t01	3.2e-32	145.6	Zinc finger protein
snap_masked-VaccDscaff37-processed-gene-44.13-mRNA-1	4098.XP_009630004.1	7.4e-96	356.7	Protein of unknown function (DUF789)
snap_masked-VaccDscaff37-processed-gene-47.15-mRNA-1	4155.Migut.H01079.1.p	1.3e-15	89.7	Domain of unknown function
snap_masked-VaccDscaff37-processed-gene-51.16-mRNA-1	3983.cassava4.1_024072m	9.5e-09	66.6	21 kDa protein-like
maker-VaccDscaff37-snap-gene-53.22-mRNA-1	3988.XP_002517893.1	9.3e-166	590.1	O-acyltransferase (WSD1-like)
augustus_masked-VaccDscaff37-processed-gene-63.7-mRNA-1	3694.POPTR_0019s12110.1	8.4e-53	214.2	transcription factor
maker-VaccDscaff37-augustus-gene-75.28-mRNA-1	29760.VIT_01s0011g02190.t01	5e-196	691.0	Rgp1
augustus_masked-VaccDscaff37-processed-gene-76.10-mRNA-1	3760.EMJ11451	3.2e-18	99.0	Plant mobile domain
maker-VaccDscaff37-snap-gene-77.38-mRNA-1	4432.XP_010242180.1	5.3e-16	90.9	G-type lectin S-receptor-like serine threonine-protein kinase
augustus_masked-VaccDscaff37-processed-gene-78.5-mRNA-1	29760.VIT_03s0063g02530.t01	9.7e-09	67.0	At1g01500-like
augustus_masked-VaccDscaff37-processed-gene-106.1-mRNA-1	3885.XP_007140310.1	7.4e-18	99.0	Encoded by
augustus_masked-VaccDscaff37-processed-gene-144.11-mRNA-1	981085.XP_010087093.1	2.8e-11	77.0	Serine threonine-protein phosphatase 7 long form homolog
augustus_masked-VaccDscaff37-processed-gene-147.4-mRNA-1	4096.XP_009775190.1	8.4e-12	78.2
maker-VaccDscaff37-augustus-gene-158.6-mRNA-1	3641.EOY32490	3e-286	991.1	G-type lectin S-receptor-like serine threonine-protein kinase
maker-VaccDscaff37-snap-gene-167.25-mRNA-1	3641.EOX91036	2e-118	434.5	Auxilin-like protein 1
augustus_masked-VaccDscaff37-processed-gene-174.0-mRNA-1	981085.XP_010099593.1	2.3e-21	107.8	adenylyltransferase
maker-VaccDscaff37-augustus-gene-181.28-mRNA-1	3827.XP_004503064.1	6.6e-49	200.3	GDP-mannose transporter
maker-VaccDscaff37-snap-gene-181.38-mRNA-1	4432.XP_010270392.1	9.8e-109	399.8	ABC transporter I family member 10
maker-VaccDscaff37-augustus-gene-187.24-mRNA-1	57918.XP_004307831.1	1e-134	486.5	isoform X1
augustus_masked-VaccDscaff37-processed-gene-190.8-mRNA-1	4096.XP_009797902.1	3.1e-25	121.7	Anaphase-promoting complex subunit 11 RING-H2 finger
maker-VaccDscaff37-augustus-gene-199.19-mRNA-1	102107.XP_008232941.1	4.8e-218	763.5	cytoskeleton organization
maker-VaccDscaff37-snap-gene-207.35-mRNA-1	29760.VIT_07s0031g01940.t01	1.3e-63	250.0	conserved protein UCP009193
snap_masked-VaccDscaff37-processed-gene-211.19-mRNA-1	218851.Aquca_003_00029.1	1.8e-11	75.1	cyclin-dependent protein kinase inhibitor
augustus_masked-VaccDscaff37-processed-gene-214.10-mRNA-1	2711.XP_006466172.1	7e-133	480.7	Belongs to the peptidase A1 family
maker-VaccDscaff37-augustus-gene-236.25-mRNA-1	3694.POPTR_0012s03330.1	7.6e-115	420.2	Endonuclease I
maker-VaccDscaff37-snap-gene-255.28-mRNA-1	3827.XP_004504938.1	9.8e-300	1036.6	L-type lectin-domain containing receptor kinase IX.1-like
maker-VaccDscaff37-augustus-gene-279.19-mRNA-1	29760.VIT_00s0174g00260.t01	7.8e-238	830.5	Belongs to the peptidase C19 family
maker-VaccDscaff37-augustus-gene-279.21-mRNA-1	4113.PGSC0003DMT400029056	5.6e-234	816.6	BTB/POZ domain
maker-VaccDscaff37-augustus-gene-287.16-mRNA-1	3988.XP_002528386.1	0.0	1892.9	Translation initiation factor eIF3 subunit 135
snap_masked-VaccDscaff1-processed-gene-0.15-mRNA-1	225117.XP_009352370.1	2.6e-26	127.9	Plant mobile domain
maker-VaccDscaff1-snap-gene-2.30-mRNA-1	3847.GLYMA09G09220.1	9.3e-143	513.1	sugar phosphate phosphate translocator
maker-VaccDscaff1-augustus-gene-6.22-mRNA-1	29760.VIT_05s0020g00400.t01	2e-262	911.8	Beta-13-galactosyltransferase
augustus_masked-VaccDscaff1-processed-gene-10.3-mRNA-1	3760.EMJ27390	1.6e-35	158.3	Plant mobile domain
augustus_masked-VaccDscaff1-processed-gene-11.6-mRNA-1	4006.Lus10016318	4.5e-10	71.2	cell wall vacuolar inhibitor of fructosidase
maker-VaccDscaff1-snap-gene-15.35-mRNA-1	3641.EOY04602	8.9e-119	434.5	disease resistance
snap_masked-VaccDscaff1-processed-gene-18.21-mRNA-1	4096.XP_009761428.1	1.8e-19	102.1	protein RESTRICTED TEV MOVEMENT 1-like
augustus_masked-VaccDscaff1-processed-gene-20.7-mRNA-1	29760.VIT_05s0077g01390.t01	7.7e-26	123.6	Zinc finger protein
maker-VaccDscaff1-augustus-gene-22.36-mRNA-1	3694.POPTR_0010s00290.1	1.8e-95	356.3	Protein of unknown function (DUF789)
maker-VaccDscaff1-augustus-gene-28.21-mRNA-1	29760.VIT_05s0077g02090.t01	6.1e-213	746.9	Belongs to the multi antimicrobial extrusion (MATE)
maker-VaccDscaff1-snap-gene-36.39-mRNA-1	29760.VIT_05s0020g01360.t01	5.8e-197	694.9	BEST Arabidopsis thaliana protein match is
maker-VaccDscaff1-snap-gene-37.27-mRNA-1	4096.XP_009763085.1	1.1e-239	837.4	zinc ion binding protein
snap_masked-VaccDscaff1-processed-gene-38.23-mRNA-1	3760.EMJ20561	1.2e-12	79.7
snap_masked-VaccDscaff1-processed-gene-38.26-mRNA-1	3760.EMJ20561	1.1e-08	68.2
maker-VaccDscaff1-snap-gene-42.36-mRNA-1	29730.Gorai.011G284900.1	1.3e-162	581.3	Belongs to the protein kinase superfamily
maker-VaccDscaff1-snap-gene-46.38-mRNA-1	3988.XP_002520704.1	9.1e-197	694.1	Removal of H(2)O(2), oxidation of toxic reductants
maker-VaccDscaff1-augustus-gene-48.35-mRNA-1	4432.XP_010244251.1	1.5e-43	184.1	F-box protein
maker-VaccDscaff1-snap-gene-51.40-mRNA-1	85681.XP_006419760.1	9.7e-273	946.0	Belongs to the adaptor complexes medium subunit family
augustus_masked-VaccDscaff1-processed-gene-54.8-mRNA-1	57918.XP_004288734.1	4.8e-28	131.7	F-box kelch-repeat protein
augustus_masked-VaccDscaff1-processed-gene-55.4-mRNA-1	71139.XP_010045077.1	3.5e-101	374.4	Belongs to the cytochrome P450 family
snap_masked-VaccDscaff1-processed-gene-56.11-mRNA-1	3218.PP1S81_57V6.1	2.4e-13	80.9	60S ribosomal Protein
augustus_masked-VaccDscaff1-processed-gene-66.5-mRNA-1	3880.AES82110	4.7e-21	109.8	Ribonuclease H protein
snap_masked-VaccDscaff1-processed-gene-84.16-mRNA-1	4096.XP_009799715.1	1.1e-24	119.8	F-box domain
maker-VaccDscaff1-augustus-gene-89.15-mRNA-1	29760.VIT_05s0020g04500.t01	4.3e-121	441.4	Plant-specific domain TIGR01615 family protein
augustus_masked-VaccDscaff1-processed-gene-112.5-mRNA-1	3760.EMJ27390	1.6e-30	142.1	Plant mobile domain
maker-VaccDscaff1-augustus-gene-116.47-mRNA-1	3641.EOY06046	8.6e-73	280.0	Belongs to the GST superfamily
snap_masked-VaccDscaff1-processed-gene-123.17-mRNA-1	3885.XP_007140535.1	5.8e-18	99.4
maker-VaccDscaff1-augustus-gene-129.20-mRNA-1	3694.POPTR_0014s10510.1	2e-216	758.8	transcription factor
maker-VaccDscaff1-snap-gene-140.29-mRNA-1	3760.EMJ23586	3.6e-174	617.8
maker-VaccDscaff1-snap-gene-151.25-mRNA-1	4555.Si031695m	3.9e-33	147.5	Tim10/DDP family zinc finger
maker-VaccDscaff1-snap-gene-158.32-mRNA-1	3983.cassava4.1_006581m	5e-152	544.7	Plant organelle RNA recognition domain
maker-VaccDscaff1-augustus-gene-162.27-mRNA-1	29760.VIT_08s0007g00320.t01	1e-143	517.7	Protein of unknown function (DUF3741)
maker-VaccDscaff1-snap-gene-176.37-mRNA-1	2711.XP_006480586.1	3e-135	488.0	Belongs to the peroxidase family
maker-VaccDscaff1-augustus-gene-182.24-mRNA-1	102107.XP_008243930.1	9.9e-117	426.8	E3 ubiquitin-protein ligase
maker-VaccDscaff1-augustus-gene-197.41-mRNA-1	4098.XP_009590777.1	9e-202	709.9	DEAD-box ATP-dependent RNA helicase
augustus_masked-VaccDscaff1-processed-gene-213.0-mRNA-1	29760.VIT_08s0007g02130.t01	4e-305	1053.9	phosphoprotein phosphatase activity
maker-VaccDscaff1-augustus-gene-214.11-mRNA-1	4155.Migut.J00712.1.p	1.6e-69	269.2	Late embryogenesis abundant protein
maker-VaccDscaff1-snap-gene-243.33-mRNA-1	29760.VIT_08s0058g00700.t01	6.8e-175	620.9	F-box LRR-repeat protein
augustus_masked-VaccDscaff1-processed-gene-251.9-mRNA-1	3641.EOY23100	3.4e-38	167.5	Plant mobile domain
maker-VaccDscaff1-augustus-gene-271.13-mRNA-1	85681.XP_006430523.1	4.8e-132	478.0	mediator of RNA polymerase II transcription subunit
maker-VaccDscaff1-snap-gene-293.21-mRNA-1	29730.Gorai.005G036900.1	2e-45	190.3	C1 domain
augustus_masked-VaccDscaff1-processed-gene-298.1-mRNA-1	3641.EOY04076	1.2e-38	169.1	Plant mobile domain
maker-VaccDscaff1-augustus-gene-308.32-mRNA-1	4155.Migut.G00831.1.p	3.4e-17	96.7	Pentatricopeptide repeat-containing protein
augustus_masked-VaccDscaff1-processed-gene-308.4-mRNA-1	4155.Migut.G00831.1.p	2.3e-23	117.1	Pentatricopeptide repeat-containing protein
maker-VaccDscaff1-augustus-gene-315.16-mRNA-1	29760.VIT_12s0142g00670.t01	1.3e-191	676.4	DEAD-box ATP-dependent RNA helicase
augustus_masked-VaccDscaff1-processed-gene-317.3-mRNA-1	3760.EMJ27390	3.6e-35	157.5	Plant mobile domain
maker-VaccDscaff1-augustus-gene-318.37-mRNA-1	2711.XP_006481379.1	9.8e-142	510.4	Belongs to the UDP-glycosyltransferase family
snap_masked-VaccDscaff1-processed-gene-319.17-mRNA-1	3641.EOY23100	1.7e-30	140.2	Plant mobile domain
maker-VaccDscaff1-snap-gene-326.37-mRNA-1	225117.XP_009345713.1	3.9e-15	87.8	Belongs to the protein kinase superfamily
maker-VaccDscaff1-augustus-gene-327.30-mRNA-1	71139.XP_010060705.1	2.4e-61	241.5	Multiprotein-bridging factor
augustus_masked-VaccDscaff1-processed-gene-334.5-mRNA-1	4098.XP_009629313.1	2.1e-121	443.7
maker-VaccDscaff1-augustus-gene-344.38-mRNA-1	29760.VIT_12s0059g00200.t01	1.2e-175	622.9	lanC-like protein GCL2
augustus_masked-VaccDscaff1-processed-gene-345.7-mRNA-1	4098.XP_009623361.1	3.6e-09	67.8	zinc-binding in reverse transcriptase
maker-VaccDscaff1-augustus-gene-359.32-mRNA-1	4098.XP_009628674.1	2.4e-210	739.2	Belongs to the formin-like family
augustus_masked-VaccDscaff1-processed-gene-364.2-mRNA-1	4155.Migut.H01557.1.p	4.2e-17	93.6	in StAR and phosphatidylcholine transfer protein
maker-VaccDscaff1-snap-gene-371.24-mRNA-1	3750.XP_008379654.1	1.4e-121	442.2	BAH and coiled-coil domain-containing protein
maker-VaccDscaff1-snap-gene-375.26-mRNA-1	102107.XP_008229836.1	1.5e-236	825.5	Transcription initiation factor TFIID subunit
snap_masked-VaccDscaff1-processed-gene-379.17-mRNA-1	29760.VIT_07s0130g00190.t01	5.4e-38	163.7	Protein SUPPRESSOR OF GENE SILENCING
snap_masked-VaccDscaff1-processed-gene-379.11-mRNA-1	3760.EMJ15862	1.4e-70	273.5	Protein SUPPRESSOR OF GENE SILENCING
maker-VaccDscaff1-snap-gene-386.30-mRNA-1	4432.XP_010252681.1	3.7e-145	522.3	Cytochrome b561 and DOMON domain-containing protein
augustus_masked-VaccDscaff1-processed-gene-398.5-mRNA-1	3641.EOY13694	3e-13	81.3	VQ motif-containing protein
augustus_masked-VaccDscaff1-processed-gene-405.5-mRNA-1	3641.EOY04076	1.2e-38	169.1	Plant mobile domain
augustus_masked-VaccDscaff1-processed-gene-408.7-mRNA-1	4432.XP_010242152.1	4.9e-15	87.0
maker-VaccDscaff1-snap-gene-409.44-mRNA-1	4096.XP_009767436.1	4.4e-95	355.9	Belongs to the disease resistance NB-LRR family
maker-VaccDscaff1-snap-gene-412.37-mRNA-1	4432.XP_010279077.1	6.7e-168	598.2	Malate dehydrogenase
augustus_masked-VaccDscaff1-processed-gene-416.4-mRNA-1	29760.VIT_19s0014g02240.t01	2.9e-46	192.2	transcription factor
augustus_masked-VaccDscaff1-processed-gene-424.4-mRNA-1	3694.POPTR_0005s04360.1	3.3e-22	111.3	disease resistance
snap_masked-VaccDscaff1-processed-gene-439.21-mRNA-1	4113.PGSC0003DMT400002802	2e-23	115.2
augustus_masked-VaccDscaff1-processed-gene-458.0-mRNA-1	102107.XP_008218991.1	5e-30	137.5	Chaperone protein DNAj
augustus_masked-VaccDscaff1-processed-gene-459.8-mRNA-1	225117.XP_009339274.1	7.1e-29	133.7	Chaperone protein DNAj
snap_masked-VaccDscaff278-processed-gene-0.22-mRNA-1	3641.EOY23100	9.6e-31	142.9	Plant mobile domain
snap_masked-VaccDscaff32-processed-gene-5.11-mRNA-1	3641.EOY04076	4.8e-38	166.8	Plant mobile domain
maker-VaccDscaff32-augustus-gene-14.29-mRNA-1	4432.XP_010265449.1	7.1e-162	577.0	Isocitrate dehydrogenase NAD regulatory subunit
maker-VaccDscaff32-augustus-gene-22.21-mRNA-1	3641.EOY32829	2.1e-93	349.4	carboxyl
maker-VaccDscaff32-snap-gene-31.35-mRNA-1	29760.VIT_02s0025g02070.t01	4.4e-14	87.0	Protein NLP7-like isoform X1
snap_masked-VaccDscaff32-processed-gene-37.19-mRNA-1	42099.EPrPV00000024663	8.2e-07	60.5	Mannitol dehydrogenase. Source PGD
maker-VaccDscaff32-augustus-gene-66.26-mRNA-1	3656.XP_008447883.1	2.6e-94	351.7	Cytokinin-activating enzyme
augustus_masked-VaccDscaff32-processed-gene-69.6-mRNA-1	981085.XP_010089954.1	3e-32	147.9	CHD3-type chromatin-remodeling factor
maker-VaccDscaff32-augustus-gene-76.17-mRNA-1	4432.XP_010266820.1	9.2e-257	892.5	C2 domain
maker-VaccDscaff32-augustus-gene-77.19-mRNA-1	29760.VIT_03s0038g02310.t01	1.6e-97	362.5	RNA polymerase II transcription regulator recruiting activity
maker-VaccDscaff32-augustus-gene-79.33-mRNA-1	4155.Migut.M01081.1.p	4.2e-81	308.5	GDSL esterase lipase
snap_masked-VaccDscaff32-processed-gene-79.16-mRNA-1	29760.VIT_19s0015g02560.t01	6.4e-43	179.9	glutathione transferase activity
maker-VaccDscaff32-snap-gene-93.27-mRNA-1	3760.EMJ00689	2.7e-17	94.4
maker-VaccDscaff32-augustus-gene-93.23-mRNA-1	71139.XP_010066197.1	2.4e-161	575.1	Belongs to the peptidase C1 family
maker-VaccDscaff32-augustus-gene-107.40-mRNA-1	981085.XP_010096202.1	7.5e-225	786.6	Belongs to the major facilitator superfamily
augustus_masked-VaccDscaff32-processed-gene-107.13-mRNA-1	3641.EOX99607	3.1e-16	94.4	Plant mobile domain
maker-VaccDscaff32-snap-gene-110.27-mRNA-1	3983.cassava4.1_004831m	1.4e-274	951.8	Dehydrogenase
maker-VaccDscaff32-snap-gene-116.31-mRNA-1	29730.Gorai.005G223300.1	5.1e-13	81.6	Protein of unknown function (DUF 659)
augustus_masked-VaccDscaff32-processed-gene-135.2-mRNA-1	3988.XP_002516830.1	3.3e-63	248.1	Protein of unknown function (DUF679)
augustus_masked-VaccDscaff32-processed-gene-154.4-mRNA-1	72658.Bostr.0556s0599.1.p	1.1e-16	93.6	afp3 afp3 (abi five binding protein 3)
augustus_masked-VaccDscaff32-processed-gene-163.8-mRNA-1	3827.XP_004508602.1	2.5e-82	312.0	Protein CHAPERONE-LIKE PROTEIN OF POR1-like
snap_masked-VaccDscaff32-processed-gene-178.17-mRNA-1	3641.EOY23100	1.3e-29	139.0	Plant mobile domain
maker-VaccDscaff32-snap-gene-188.22-mRNA-1	4098.XP_009587296.1	0.0	1141.7	cyclic nucleotide-gated ion channel 20, chloroplastic
maker-VaccDscaff32-snap-gene-192.44-mRNA-1	3983.cassava4.1_022085m	1.2e-50	205.7	Belongs to the mitochondrial carrier (TC 2.A.29) family
snap_masked-VaccDscaff32-processed-gene-195.11-mRNA-1	3641.EOY12746	1.2e-20	108.6	ribonuclease H protein At1g65750
augustus_masked-VaccDscaff32-processed-gene-196.0-mRNA-1	3983.cassava4.1_032442m	1.3e-40	172.9	cyclic nucleotide-gated ion channel
maker-VaccDscaff32-augustus-gene-205.18-mRNA-1	3641.EOX91117	5.2e-225	786.9	cytochrome P450
maker-VaccDscaff32-augustus-gene-211.22-mRNA-1	4432.XP_010270793.1	4.9e-136	490.7	ribosome production factor 2 homolog
maker-VaccDscaff32-augustus-gene-256.13-mRNA-1	29760.VIT_07s0129g00530.t01	6.7e-128	463.8	Sigma factor sigB regulation protein rsbQ
maker-VaccDscaff32-augustus-gene-262.26-mRNA-1	29760.VIT_00s1328g00020.t01	7.7e-20	102.8	Phytosulfokines
maker-VaccDscaff32-augustus-gene-267.32-mRNA-1	29760.VIT_00s1328g00020.t01	7.7e-20	102.8	Phytosulfokines
snap_masked-VaccDscaff32-processed-gene-271.17-mRNA-1	3218.PP1S89_131V6.1	7.4e-14	85.5	Protein of unknown function (DUF1517)
maker-VaccDscaff32-augustus-gene-273.17-mRNA-1	38727.Pavir.J02838.1.p	3.2e-07	62.0	Oligosaccaryltransferase
augustus_masked-VaccDscaff32-processed-gene-281.0-mRNA-1	3641.EOY22000	7.9e-54	218.4	Zinc finger protein
augustus_masked-VaccDscaff32-processed-gene-291.9-mRNA-1	57918.XP_004296560.1	9.2e-107	394.4	metalloendoproteinase 1-like
snap_masked-VaccDscaff32-processed-gene-291.24-mRNA-1	3988.XP_002517399.1	7.8e-14	82.8	Nucleolar complex protein 2 homolog
maker-VaccDscaff32-snap-gene-298.32-mRNA-1	102107.XP_008230581.1	1.5e-182	646.0	Polygalacturonase
maker-VaccDscaff32-snap-gene-307.33-mRNA-1	3750.XP_008374505.1	0.0	1704.1	TPLATE-like
maker-VaccDscaff32-snap-gene-315.50-mRNA-1	102107.XP_008231065.1	1.5e-194	685.6	Belongs to the DHHC palmitoyltransferase family
augustus_masked-VaccDscaff32-processed-gene-319.0-mRNA-1	3641.EOY02992	5.6e-259	900.2	Potassium transporter
maker-VaccDscaff32-snap-gene-321.31-mRNA-1	29760.VIT_07s0129g00860.t01	0.0	1186.0	Belongs to the cytochrome P450 family
maker-VaccDscaff32-snap-gene-322.51-mRNA-1	3694.POPTR_0005s11890.1	3.1e-75	288.1	Glyoxalase/Bleomycin resistance protein/Dioxygenase
maker-VaccDscaff32-augustus-gene-323.35-mRNA-1	981085.XP_010113349.1	5.8e-181	640.2	Belongs to the iron ascorbate-dependent oxidoreductase family
augustus_masked-VaccDscaff32-processed-gene-324.2-mRNA-1	85681.XP_006425453.1	2.6e-243	848.2	Armadillo beta-catenin repeat family protein
maker-VaccDscaff32-augustus-gene-332.35-mRNA-1	3827.XP_004499846.1	2.6e-36	159.8	Belongs to the 'GDSL' lipolytic enzyme family
maker-VaccDscaff154-augustus-gene-2.46-mRNA-1	29760.VIT_01s0010g01030.t01	1.5e-64	253.8	F-box FBD LRR-repeat protein At1g13570-like
augustus_masked-VaccDscaff154-processed-gene-2.5-mRNA-1	29760.VIT_01s0010g01030.t01	1.4e-85	323.6	F-box FBD LRR-repeat protein At1g13570-like
maker-VaccDscaff154-snap-gene-2.60-mRNA-1	29760.VIT_01s0010g01030.t01	2.3e-61	243.0	F-box FBD LRR-repeat protein At1g13570-like
maker-VaccDscaff374-snap-gene-0.33-mRNA-1	981085.XP_010107916.1	1.6e-129	469.2	caffeoyl-CoA O-methyltransferase
maker-VaccDscaff578-snap-gene-0.21-mRNA-1	29730.Gorai.008G022800.1	7.5e-181	639.8	Cinnamyl alcohol dehydrogenase
maker-VaccDscaff35-augustus-gene-1.20-mRNA-1	3988.XP_002518131.1	7.3e-280	969.5	Ankyrin repeat domain-containing protein
augustus_masked-VaccDscaff35-processed-gene-6.1-mRNA-1	225117.XP_009343106.1	1e-90	342.0	receptor-like protein 12
maker-VaccDscaff35-snap-gene-13.34-mRNA-1	29730.Gorai.003G075200.1	2.7e-43	181.8	Alpha-trehalose glucohydrolase
augustus_masked-VaccDscaff35-processed-gene-13.9-mRNA-1	3760.EMJ27390	9.9e-38	166.0	Plant mobile domain
maker-VaccDscaff35-augustus-gene-15.26-mRNA-1	161934.XP_010668002.1	8.5e-15	89.0	ribonuclease H protein At1g65750
augustus_masked-VaccDscaff35-processed-gene-18.11-mRNA-1	161934.XP_010676554.1	7.2e-55	221.5	Myb/SANT-like DNA-binding domain
maker-VaccDscaff35-augustus-gene-37.35-mRNA-1	4098.XP_009606154.1	2.8e-211	741.9	Legume lectin domain
snap_masked-VaccDscaff35-processed-gene-47.22-mRNA-1	4096.XP_009776078.1	3.7e-18	99.0	A Receptor for Ubiquitination Targets
augustus_masked-VaccDscaff35-processed-gene-49.5-mRNA-1	3641.EOY06271	3e-38	166.4	F-box Kelch-repeat protein
maker-VaccDscaff35-augustus-gene-61.25-mRNA-1	3694.POPTR_0019s13040.1	1.4e-146	525.8	60S ribosomal Protein
maker-VaccDscaff35-augustus-gene-63.33-mRNA-1	102107.XP_008224653.1	1.6e-106	392.1	Ras-related protein
maker-VaccDscaff35-snap-gene-72.50-mRNA-1	218851.Aquca_028_00124.1	1.8e-28	133.3	Transcription initiation factor IIF subunit
augustus_masked-VaccDscaff35-processed-gene-72.1-mRNA-1	29760.VIT_10s0405g00040.t01	3.3e-93	349.0	Cytochrome b561 and DOMON domain-containing protein
maker-VaccDscaff35-snap-gene-74.51-mRNA-1	3656.XP_008458980.1	9.7e-229	799.3	Belongs to the TRAFAC class dynamin-like GTPase
augustus_masked-VaccDscaff35-processed-gene-75.8-mRNA-1	225117.XP_009356034.1	2.7e-20	105.5	Domain of unknown function (DUF4539)
augustus_masked-VaccDscaff35-processed-gene-79.7-mRNA-1	3694.POPTR_0004s13930.1	1e-07	63.2
maker-VaccDscaff35-augustus-gene-87.36-mRNA-1	29760.VIT_00s0904g00010.t01	7.3e-89	333.6	oxygen-evolving enhancer protein
maker-VaccDscaff35-augustus-gene-105.23-mRNA-1	4113.PGSC0003DMT400076427	0.0	2326.6	DNA-dependent RNA polymerase
augustus_masked-VaccDscaff35-processed-gene-106.7-mRNA-1	38727.Pavir.J11338.1.p	6.8e-11	74.3	zinc-binding in reverse transcriptase
augustus_masked-VaccDscaff35-processed-gene-112.2-mRNA-1	7739.XP_002611004.1	2.3e-63	248.8	protein heterodimerization activity
maker-VaccDscaff35-snap-gene-118.27-mRNA-1	2711.XP_006467687.1	0.0	1166.4	ATP-dependent RNA helicase
maker-VaccDscaff35-augustus-gene-147.16-mRNA-1	4155.Migut.C00650.1.p	7.3e-12	76.3	Predicted membrane protein (DUF2053)
maker-VaccDscaff35-augustus-gene-148.23-mRNA-1	4533.OB04G36510.1	2.7e-29	135.2	Belongs to the dihydroorotate dehydrogenase family
maker-VaccDscaff35-augustus-gene-182.23-mRNA-1	4096.XP_009764611.1	3.1e-24	119.0	F-box protein
maker-VaccDscaff35-augustus-gene-195.34-mRNA-1	29760.VIT_00s0225g00050.t01	2.6e-163	582.0	Belongs to the multi antimicrobial extrusion (MATE)
maker-VaccDscaff35-augustus-gene-223.25-mRNA-1	29760.VIT_14s0108g00030.t01	2.5e-184	651.7	Pectate lyase
maker-VaccDscaff35-augustus-gene-223.31-mRNA-1	29760.VIT_01s0026g01750.t01	5.1e-193	681.0	Pentatricopeptide repeat-containing protein
maker-VaccDscaff35-augustus-gene-226.26-mRNA-1	3694.POPTR_0010s17150.1	3.3e-78	298.1	Vesicle transport V-snare
augustus_masked-VaccDscaff35-processed-gene-226.5-mRNA-1	4096.XP_009786893.1	7.1e-139	500.4
maker-VaccDscaff35-augustus-gene-235.36-mRNA-1	3656.XP_008465627.1	2e-28	132.5
maker-VaccDscaff35-augustus-gene-238.25-mRNA-1	29760.VIT_17s0000g02970.t01	1.3e-210	739.2	Belongs to the multi antimicrobial extrusion (MATE)
maker-VaccDscaff35-snap-gene-239.44-mRNA-1	4098.XP_009610462.1	6.8e-50	204.1	Reticulon
augustus_masked-VaccDscaff35-processed-gene-240.6-mRNA-1	981085.XP_010101546.1	2.8e-195	689.5	serine threonine-protein kinase
augustus_masked-VaccDscaff35-processed-gene-247.1-mRNA-1	4432.XP_010262942.1	3.1e-39	168.3	AP2 ERF and B3 domain-containing transcription
augustus_masked-VaccDscaff35-processed-gene-256.6-mRNA-1	3641.EOY22094	8.3e-82	310.8	transcription factor
maker-VaccDscaff35-augustus-gene-261.42-mRNA-1	4096.XP_009800357.1	2.9e-50	204.5	MazG-like family
maker-VaccDscaff35-augustus-gene-272.38-mRNA-1	4096.XP_009789828.1	3.2e-148	531.9	Cytochrome p450
maker-VaccDscaff35-snap-gene-278.66-mRNA-1	102107.XP_008239460.1	2.1e-49	202.2	Det1 complexing ubiquitin ligase
augustus_masked-VaccDscaff35-processed-gene-278.4-mRNA-1	3983.cassava4.1_007309m	3.2e-71	275.8	mTERF
augustus_masked-VaccDscaff35-processed-gene-287.4-mRNA-1	4098.XP_009603305.1	5.6e-11	73.9
maker-VaccDscaff35-augustus-gene-291.31-mRNA-1	3694.POPTR_0001s03340.1	4.1e-71	274.6
snap_masked-VaccDscaff35-processed-gene-297.19-mRNA-1	3983.cassava4.1_006224m	1.2e-242	845.5	Binds to the signal sequence of presecretory protein
maker-VaccDscaff35-augustus-gene-298.19-mRNA-1	3988.XP_002517647.1	3.3e-134	485.0	SNF1-related protein kinase regulatory subunit gamma-like
maker-VaccDscaff35-augustus-gene-301.25-mRNA-1	29760.VIT_09s0002g05710.t01	2.1e-295	1021.1	ADP,ATP carrier protein
maker-VaccDscaff35-augustus-gene-311.26-mRNA-1	57918.XP_004297544.1	3e-214	751.1	Histone-binding protein RBBP4 or subunit C of CAF1 complex
maker-VaccDscaff35-snap-gene-315.53-mRNA-1	3641.EOY01645	1.1e-20	105.9	Cytochrome b5
maker-VaccDscaff35-augustus-gene-318.27-mRNA-1	117187.FVEG_09167T0	1.2e-09	69.7
maker-VaccDscaff237-augustus-gene-0.46-mRNA-1	71139.XP_010023651.1	1.8e-262	911.4	Interconversion of serine and glycine
augustus_masked-VaccDscaff472-processed-gene-0.0-mRNA-1	4096.XP_009790593.1	5.7e-180	637.1	Nucleoside transporter
maker-VaccDscaff555-snap-gene-0.12-mRNA-1	3847.GLYMA13G33450.1	7.3e-22	110.2	SNARE-complex protein Syntaxin-18 N-terminus
maker-VaccDscaff186-snap-gene-0.36-mRNA-1	29760.VIT_03s0038g04080.t01	1.2e-195	689.5	Belongs to the class-I aminoacyl-tRNA synthetase family
maker-VaccDscaff186-snap-gene-1.66-mRNA-1	3760.EMJ02285	4.3e-158	564.3	protein phosphatase 2C 27
maker-VaccDscaff44-augustus-gene-0.19-mRNA-1	102107.XP_008238828.1	4.5e-197	694.5	transcription factor
maker-VaccDscaff44-augustus-gene-1.27-mRNA-1	4155.Migut.E00886.1.p	6.3e-12	78.2	Protein NLP7-like isoform X1
snap_masked-VaccDscaff44-processed-gene-6.16-mRNA-1	3988.XP_002518865.1	1.9e-16	91.3	Belongs to the heat shock protein 70 family
maker-VaccDscaff44-augustus-gene-7.23-mRNA-1	4432.XP_010267527.1	2.3e-225	788.5	Alpha-trehalose glucohydrolase
maker-VaccDscaff44-snap-gene-10.45-mRNA-1	4096.XP_009802044.1	8.8e-70	271.2	meprin and TRAF homology
augustus_masked-VaccDscaff44-processed-gene-14.4-mRNA-1	4432.XP_010275010.1	2.3e-20	106.7
maker-VaccDscaff44-augustus-gene-15.34-mRNA-1	29760.VIT_02s0025g01370.t01	4.3e-64	252.3
snap_masked-VaccDscaff44-processed-gene-18.13-mRNA-1	85681.XP_006439369.1	3.9e-11	73.6	Peptidase inhibitor I9
augustus_masked-VaccDscaff44-processed-gene-27.3-mRNA-1	4432.XP_010251606.1	2.7e-56	225.3	Plant cell wall protein SlTFR88
maker-VaccDscaff44-snap-gene-27.24-mRNA-1	29760.VIT_02s0025g00530.t01	7.7e-27	127.5	Late embryogenesis abundant protein
maker-VaccDscaff44-augustus-gene-28.26-mRNA-1	29760.VIT_02s0025g00390.t01	5.6e-41	173.3	DET1- and DDB1-associated protein
maker-VaccDscaff44-augustus-gene-29.16-mRNA-1	3988.XP_002509855.1	7.7e-137	493.8	Protein BYPASS1-related
maker-VaccDscaff44-augustus-gene-31.34-mRNA-1	29760.VIT_02s0025g00110.t01	0.0	1333.5	DNA repair helicase
maker-VaccDscaff44-augustus-gene-39.36-mRNA-1	3750.XP_008366428.1	2.1e-221	775.4	glycerophosphoryl diester phosphodiesterase
maker-VaccDscaff44-augustus-gene-42.26-mRNA-1	3988.XP_002509785.1	1.5e-92	345.9	Glutathione S-transferase
maker-VaccDscaff44-augustus-gene-56.22-mRNA-1	29760.VIT_04s0008g05780.t01	2.8e-200	705.3	Transcription initiation factor TFIID subunit
maker-VaccDscaff44-snap-gene-58.38-mRNA-1	3641.EOY29346	5.3e-61	241.5	WRKY Transcription Factor
augustus_masked-VaccDscaff44-processed-gene-58.4-mRNA-1	13333.ERN20508	3.4e-16	91.7	Vesicle-fusing
maker-VaccDscaff44-augustus-gene-59.33-mRNA-1	3988.XP_002529405.1	6.4e-21	108.6	U1-like zinc finger
augustus_masked-VaccDscaff44-processed-gene-61.5-mRNA-1	3659.XP_004137555.1	1.7e-13	82.8	Domain of unknown function (DUF4539)
maker-VaccDscaff44-snap-gene-76.38-mRNA-1	981085.XP_010099854.1	1.2e-88	332.8	ER membrane protein complex subunit 7 homolog
snap_masked-VaccDscaff44-processed-gene-103.13-mRNA-1	2711.XP_006481381.1	2.6e-26	125.2	Pentatricopeptide repeat-containing protein
snap_masked-VaccDscaff44-processed-gene-103.12-mRNA-1	2711.XP_006481381.1	1.2e-19	103.2	Pentatricopeptide repeat-containing protein
snap_masked-VaccDscaff44-processed-gene-107.28-mRNA-1	3641.EOY29680	3.5e-200	704.1	Aspartate aminotransferase
maker-VaccDscaff44-augustus-gene-108.28-mRNA-1	71139.XP_010049087.1	3.5e-139	501.1	Branched-chain-amino-acid aminotransferase-like protein 3
augustus_masked-VaccDscaff44-processed-gene-125.4-mRNA-1	4432.XP_010260734.1	6e-80	304.3	cationic amino acid transporter
maker-VaccDscaff44-augustus-gene-135.13-mRNA-1	29760.VIT_10s0003g05030.t01	5.7e-301	1040.4	LRR receptor-like serine threonine-protein kinase
augustus_masked-VaccDscaff44-processed-gene-153.3-mRNA-1	3760.EMJ27390	4.2e-36	160.6	Plant mobile domain
snap_masked-VaccDscaff44-processed-gene-154.18-mRNA-1	4098.XP_009612511.1	2.4e-170	605.1	GDSL-like Lipase/Acylhydrolase
augustus_masked-VaccDscaff44-processed-gene-161.2-mRNA-1	3641.EOY04076	1.4e-37	165.6	Plant mobile domain
maker-VaccDscaff44-augustus-gene-177.22-mRNA-1	4432.XP_010275353.1	0.0	1516.9	Involved in the RNA silencing pathway
maker-VaccDscaff44-augustus-gene-181.23-mRNA-1	4096.XP_009796286.1	1.4e-93	349.7	Salt stress response/antifungal
maker-VaccDscaff44-snap-gene-181.29-mRNA-1	4155.Migut.E00467.1.p	3.4e-07	60.5	Salt stress response/antifungal
maker-VaccDscaff44-augustus-gene-182.26-mRNA-1	29760.VIT_01s0011g05560.t01	6e-101	374.4	TIFY 6B-like
snap_masked-VaccDscaff44-processed-gene-186.19-mRNA-1	264402.Cagra.3359s0008.1.p	7.4e-09	70.9	Plant mobile domain
maker-VaccDscaff44-snap-gene-198.40-mRNA-1	29760.VIT_10s0042g01060.t01	2.2e-171	609.0
maker-VaccDscaff44-snap-gene-206.29-mRNA-1	4155.Migut.L01035.1.p	6e-146	525.8	Protein tyrosine kinase
maker-VaccDscaff1339-augustus-gene-0.5-mRNA-1	29760.VIT_03s0091g00120.t01	5.9e-17	95.1
maker-VaccDscaff30-augustus-gene-14.23-mRNA-1	3760.EMJ05462	0.0	1179.1	subtilisin-like
maker-VaccDscaff30-augustus-gene-16.24-mRNA-1	3750.XP_008385869.1	2.9e-32	145.6	Belongs to the MAK16 family
snap_masked-VaccDscaff30-processed-gene-16.10-mRNA-1	3750.XP_008385869.1	5.8e-46	191.0	Belongs to the MAK16 family
maker-VaccDscaff30-snap-gene-29.52-mRNA-1	29760.VIT_11s0016g01830.t01	9.1e-241	840.1	U-box domain-containing protein
maker-VaccDscaff30-snap-gene-29.51-mRNA-1	3885.XP_007154341.1	6.2e-10	69.7	Belongs to the importin alpha family
snap_masked-VaccDscaff30-processed-gene-38.28-mRNA-1	3641.EOY29905	9.4e-15	85.9	Domain of unknown function (DUF4408)
augustus_masked-VaccDscaff30-processed-gene-38.6-mRNA-1	3760.EMJ27390	2.2e-38	168.3	Plant mobile domain
augustus_masked-VaccDscaff30-processed-gene-54.6-mRNA-1	4432.XP_010275010.1	6.7e-15	88.6
maker-VaccDscaff30-augustus-gene-93.26-mRNA-1	3694.POPTR_0004s18020.1	9.7e-98	363.2	RNA polymerase II transcription regulator recruiting activity
maker-VaccDscaff30-augustus-gene-93.23-mRNA-1	4432.XP_010266820.1	9.2e-257	892.5	C2 domain
augustus_masked-VaccDscaff30-processed-gene-95.8-mRNA-1	161934.XP_010690398.1	2.5e-30	139.0	glycine-rich protein
maker-VaccDscaff30-snap-gene-106.56-mRNA-1	29730.Gorai.008G032800.1	3.7e-19	101.3	Pentatricopeptide repeat-containing protein
maker-VaccDscaff30-snap-gene-110.68-mRNA-1	2711.XP_006487291.1	5.7e-19	100.1	Pentatricopeptide repeat-containing protein
maker-VaccDscaff30-augustus-gene-112.38-mRNA-1	29760.VIT_03s0038g00700.t01	0.0	1185.6	Belongs to the TRAFAC class myosin-kinesin ATPase
maker-VaccDscaff30-augustus-gene-116.25-mRNA-1	71139.XP_010066197.1	2.1e-162	578.6	Belongs to the peptidase C1 family
maker-VaccDscaff30-augustus-gene-117.29-mRNA-1	3760.EMJ00689	2.7e-17	94.4
maker-VaccDscaff30-augustus-gene-132.30-mRNA-1	981085.XP_010096202.1	2.3e-226	791.6	Belongs to the major facilitator superfamily
snap_masked-VaccDscaff30-processed-gene-139.11-mRNA-1	102107.XP_008222471.1	3.1e-08	65.5	Ribosomal protein-like protein
augustus_masked-VaccDscaff30-processed-gene-157.0-mRNA-1	3983.cassava4.1_002023m	5.4e-76	292.4	Plant protein of unknown function (DUF863)
augustus_masked-VaccDscaff30-processed-gene-174.3-mRNA-1	3760.EMJ27390	9e-21	109.4	Plant mobile domain
maker-VaccDscaff30-augustus-gene-181.21-mRNA-1	3827.XP_004508602.1	1.6e-83	315.8	Protein CHAPERONE-LIKE PROTEIN OF POR1-like
augustus_masked-VaccDscaff30-processed-gene-187.9-mRNA-1	3760.EMJ27390	2.9e-12	80.1	Plant mobile domain
augustus_masked-VaccDscaff30-processed-gene-195.0-mRNA-1	102107.XP_008233477.1	1.3e-10	75.5	Plant mobile domain
snap_masked-VaccDscaff30-processed-gene-203.18-mRNA-1	3641.EOY23100	5.5e-29	135.6	Plant mobile domain
maker-VaccDscaff30-augustus-gene-213.24-mRNA-1	3983.cassava4.1_006368m	4e-225	787.3	Cytochrome p450
augustus_masked-VaccDscaff30-processed-gene-214.5-mRNA-1	3760.EMJ27390	9.1e-36	159.5	Plant mobile domain
augustus_masked-VaccDscaff30-processed-gene-218.5-mRNA-1	3760.EMJ27390	1.4e-31	145.6	Plant mobile domain
maker-VaccDscaff30-augustus-gene-219.26-mRNA-1	4432.XP_010270793.1	4.2e-135	487.6	ribosome production factor 2 homolog
maker-VaccDscaff30-augustus-gene-219.29-mRNA-1	981085.XP_010099829.1	4.5e-64	251.1	Homeobox domain
maker-VaccDscaff30-augustus-gene-232.17-mRNA-1	4098.XP_009598965.1	1.4e-153	550.1	Mitogen-activated protein kinase kinase kinase
maker-VaccDscaff30-augustus-gene-239.30-mRNA-1	4098.XP_009589845.1	3e-71	275.4	Heat shock factor
[truncated: 593 more rows]
